# Supplementary material for: Integrated Metabolomic and Transcriptomic Analysis of Anthocyanin Metabolism in Wheat Pericarp
Source: Research Square preprint supplement (doi:10.21203/rs.3.rs-5030591/v1), 2024-12-05
Supplement: Supplementary file 1 [file 16df30ef866abb188f552d1a.xlsx]

## Sheet: Table S3
Table S3: The other identified differentially expressed transcription factors between Shiluan02-1 and Hengzi151.
ID	Shiluan02-1-1	Shiluan02-1-2	Shiluan02-1-3	Hengzi151-1	Hengzi151-2	Hengzi151-3	TFs	Type
LOC100125707	0.412506	0.253825	0.280143	1.69503	0.903329	1.43073	AP2/ERF	TF
LOC123112960	0.0249722	0.0197563	0.0826763	0.726039	0.99696	0.692908	AP2/ERF	TF
LOC123154669	0	0	0	10.5586	11.0347	9.46689	AP2/ERF	TF
LOC123042630	16.7686	17.0955	16.841	0.963019	1.25541	0.52753	AP2/ERF	TF
LOC123108302	0.678552	0.946658	0.825019	0	0	0	AP2/ERF	TF
LOC123138224	6.84553	7.68285	6.64634	0	0.0442567	0.0144642	AP2/ERF	TF
LOC123185880	1.79875	1.18009	1.63125	0	0	0.152166	AP2/ERF	TF
LOC123054617	1.61149	1.69987	1.728	20.8517	22.6309	24.7315	B3	TF
LOC123096155	0.576209	0.371439	0.456538	1.92097	2.0545	2.06197	B3	TF
LOC123117617	0	0	0	1.58275	0.899393	1.40056	B3	TF
LOC123132397	0.0476671	0.0419011	0.0566509	0.310434	0.200739	0.267675	B3	TF
LOC123080781	1.1293	1.3997	1.75436	0.315198	0.0285347	0	B3	TF
LOC123105379	5.86956	5.25901	5.58303	0.0438621	0.119124	0.0467194	B3	TF
LOC123111511	0.461986	0.777081	0.67413	0.0348499	0.113578	0.0989869	BES1	TF
LOC123127245	0.27519	0.203198	0	1.45935	1.19598	1.49988	bZIP	TF
LOC123043995	11.7527	12.4289	10.2009	2.59411	2.74236	3.10477	bZIP	TF
LOC123190476	22.9692	22.642	24.4824	4.33539	5.19187	6.21768	bZIP	TF
LOC123055437	0.758156	1.14745	0.889852	4.64619	4.76421	4.11588	C2C2	TF
LOC123079039	0.339208	0.198784	0.115182	0.99936	1.23803	0.653616	C2C2	TF
LOC123128245	0.873413	0.69689	0.787073	4.92764	4.57225	4.37202	C2C2	TF
LOC123138077	1.43016	1.23101	1.52682	6.00354	6.07098	6.17921	C2C2	TF
LOC123145345	1.36998	1.68809	1.48203	7.7377	8.14855	7.3527	C2C2	TF
LOC123084774	1.30033	1.26613	1.32463	0.07755	0.370685	0.280846	C2C2	TF
LOC123111814	1.76617	1.56041	1.87224	0	0	0	C2C2	TF
LOC123157386	0	0	0	1.11844	1.5243	1.79778	C2H2	TF
LOC123159444	0	0	0	0.505125	0.83409	0.731721	C2H2	TF
LOC123162023	0	0	0	2.21156	1.9148	2.03682	C2H2	TF
LOC123184132	0.387434	0.429116	0.611745	2.34296	2.72149	2.55317	C2H2	TF
LOC123103591	3.0776	3.00591	2.51583	0.954431	0.288013	0.357694	C2H2	TF
LOC123043256	0.432219	0.383389	0.450302	3.49114	3.09763	3.76724	C3H	TF
LOC123136750	1.25261	1.46039	0.772324	0	0	0	C3H	TF
LOC123161325	2.54092	2.85181	3.10609	0.113471	0	0.0604315	CPP	TF
LOC123176402	0.925307	0.790138	0.852827	0	0	0	CPP	TF
LOC123184807	2.36615	1.88612	2.41037	0	0	0	CPP	TF
LOC123052758	0.0427845	0.135393	0.058112	1.07474	0.980162	1.10235	FAR1	TF
LOC123057809	0	0	0	6.14588	6.17173	6.41491	FAR1	TF
LOC123067920	0.0260163	0.0182954	0.0176683	1.41194	1.61274	1.28907	FAR1	TF
LOC123068911	0	0	0	7.36785	7.89195	7.21356	FAR1	TF
LOC123069326	0	0	0	2.95778	2.78416	2.5866	FAR1	TF
LOC123110286	0	0	0	3.67731	4.48134	3.57746	FAR1	TF
LOC123156742	0.0424273	0.014918	0.0576268	1.40786	1.31503	1.92002	FAR1	TF
LOC123187469	0	0	0	3.15492	3.30289	3.77345	FAR1	TF
LOC123040174	1.57222	1.1468	0.630418	0	0	0	FAR1	TF
LOC123040487	1.1779	1.00272	1.19991	0.153807	0.271519	0.184305	FAR1	TF
LOC123071723	3.24308	3.84723	3.44778	0.20679	0.224647	0.0800948	FAR1	TF
LOC123085738	1.10123	1.22408	0.856435	0	0	0	FAR1	TF
LOC123104019	1.37694	1.07088	0.950964	0.0325692	0.235878	0.115636	FAR1	TF
LOC123104915	0.88272	0.998441	0.996721	0	0	0	FAR1	TF
LOC123149268	0.6807	0.638251	0.462281	0	0	0	FAR1	TF
LOC123157156	4.27183	4.93333	4.99017	0.00897147	0.0292385	0.0860031	FAR1	TF
LOC123168774	1.50027	1.95761	1.69616	0.0161364	0.0262947	0.0343751	FAR1	TF
LOC123170664	0.954142	1.37113	1.07058	0.0385956	0.0559046	0.0685165	FAR1	TF
LOC123184720	6.60721	6.47051	7.86077	0	0	0	FAR1	TF
LOC123184722	5.95465	5.2659	7.0963	0	0	0	FAR1	TF
LOC123187472	3.52193	3.81747	4.59062	0	0	0	FAR1	TF
LOC123187923	2.70519	2.73189	2.5528	0	0	0	FAR1	TF
LOC123187972	2.39522	2.56922	2.60471	0.00940265	0	0.0200303	FAR1	TF
LOC123058025	0.170255	0.244898	0.283805	1.16639	1.06375	1.44177	GARP	TF
LOC123063675	0.204227	0.129256	0.208043	2.67908	2.41503	2.75241	GARP	TF
LOC123072822	0.310229	0.163621	0.0902932	1.71114	1.79171	1.27363	GARP	TF
LOC123080986	0.0394451	0.187238	0	2.01841	1.19602	1.83718	GARP	TF
LOC123136621	0.0331245	0.157235	0.185589	1.32517	0.770017	1.01759	GARP	TF
LOC123148560	0.00828336	0.00873764	0	0.793774	0.845575	0.8619	GARP	TF
LOC123106077	0.153816	0.249618	0.204903	0.726533	1.36329	1.24287	GRAS	TF
LOC123112854	0	0	0.00671151	0.392295	0.312969	0.404792	GRAS	TF
LOC123046275	0.328669	0.316977	0.373075	0.0349465	0.0569463	0.148892	HB	TF
LOC123102758	17.3567	16.6461	17.1657	0.307755	0.550662	0.231391	HB	TF
LOC123114519	10.534	12.9323	10.6702	0.664438	1.56393	0.766698	HB	TF
LOC123161615	3.63735	4.79145	4.52971	0.0161917	0	0.0431161	HB	TF
LOC123104996	0.24875	0.171564	0.165684	1.49538	1.53749	1.17564	HSF	TF
LOC123122798	0.313948	0.130459	0.164753	1.56665	1.36539	1.565	HSF	TF
LOC123066715	0.103852	0.0657287	0.105793	0.599047	0.776734	0.720403	LOB	TF
LOC123063125	0.512168	0.288137	0.417391	3.08138	3.451	2.53772	MADS	TF
LOC123092968	3.68194	5.66397	3.04748	26.2982	25.0416	25.0848	MADS	TF
LOC123138303	0.394706	0.364309	0.0753904	28.6432	27.0276	31.6092	MADS	TF
LOC123145554	23.9291	22.6392	23.0695	1.7902	2.36865	2.10239	MADS	TF
LOC123155767	2.57452	2.65028	2.30666	0.548309	0.595657	0.491813	MADS	TF
LOC123169618	6.17606	7.8013	8.24765	0.0482856	0.10491	0	MADS	TF
LOC123042950	0.0135036	0	0	1.31914	1.39211	1.4586	NAC	TF
LOC123042951	0	0	0	1.06554	0.815979	1.13495	NAC	TF
LOC123159027	1.12632	1.35782	1.52982	12.3501	12.6576	12.1182	NAC	TF
LOC123191207	0.208195	0.159718	0.308488	0.933267	1.45383	0.919039	NAC	TF
LOC123043337	2.15253	2.64572	2.19276	0	0	0	NAC	TF
LOC123068669	3.3729	3.16652	3.98569	0.376564	0.357946	0.233972	NAC	TF
LOC123134946	5.03202	5.16785	5.02455	0.787994	0.788899	0.806412	NAC	TF
LOC123189700	0.35101	0.12342	0.405245	1.50221	0.993348	1.43774	NF-Y	TF
LOC123112815	0.141736	0.0934435	0.19853	0.807683	0.590921	0.509156	SRS	TF
LOC123167974	0.191768	0.168571	0.0651171	0.490638	0.694523	0.617618	SRS	TF
LOC123183069	7.29444	6.87663	7.33404	0.147212	0.0639698	0.156802	Trihelix	TF
LOC123158136	0.211743	0.111678	0.12942	0.768295	0.727634	0.629495	WRKY	TF
LOC100049024	6.25799	5.43746	5.11545	0.601688	0.346047	0.320442	WRKY	TF
