# Supplementary material for: Integrated Metabolomic and Transcriptomic Analysis of Anthocyanin Metabolism in Wheat Pericarp
Source: Research Square preprint supplement (doi:10.21203/rs.3.rs-5030591/v1), 2024-12-05
Supplement: Supplementary file 2 [file 2292f0add16b9b5e788e5831.xlsx]

## Sheet: Table S4
Table S4: Sequences of specific primers for qRT-PCR.
Primer name	Forward (5'-3')	Reverse (5'-3')
PAL (LOC123105206)	CTCCGGTGACCTTGTTCCAC	CTGGATACCGGCGATCTTGAA
CHI (LOC123113970)	CGTGTCCGAGCTGGAGG	GATGAACTTGCCCCCGATCT
CHS (LOC123190869)	CTCCAAGATCACCCACCTCG	CATGAGGCGCTTGACGGA
CHS (LOC123088283)	CCTACGCCTAGCCAAAGACC	GAAGAGTCCCTGGGGGATGA
CHS (LOC123047221)	GTCCAAGATCACCCACCTCG	CATCATGAGGCGCTTGACGG
CHS (LOC123055015)	GGTGATCATTGGCGCGGAC	TGAGGAGGTGGAAGGTGAGG
F3H (LOC123042301)	GGACATGGACCAGAAGGTGG	GTGTGACGCTTGAGACCCAG
F3H (LOC100192198)	GGTGCAGGATTGGAGGGAAA	CCACCTCCCGTAGTCCCG
F3H (LOC123186261)	GTGAAGGCGAGGGACTACGG	CACGACAGTCCCATGAGTCG
actin	GGATCTGTATGGTAATGTTGTTCT	CACTGTATTTCCTTTCAGGTGGTG
