# Supplementary material for: Integrated Metabolomic and Transcriptomic Analysis of Anthocyanin Metabolism in Wheat Pericarp
Source: Research Square preprint supplement (doi:10.21203/rs.3.rs-5030591/v1), 2024-12-05
Supplement: Supplementary file 3 [file 401225120db10642a2715dc8.xlsx]

## Sheet: Table S1
Table S1：The differentially expressed flavonoids compounds between Shiluan02-1 and Hengzi151.
Index	Formula	Compounds	Class I	Class II	Shiluan02-1-1	Shiluan02-1-2	Shiluan02-1-3	Hengzi151-1	Hengzi151-2	Hengzi151-3	VIP	p_value	FDR	Fold_Change	Log2FC	Type
Lmbn006032	C15H10O7	Hypolaetin*	Flavonoids	Flavones	2922.7	2173.7	2658.3	9	9	9	1.09726	0.00717082	0.0127211	0.00348176	-8.16597	down
Lmjp007790	C18H16O6	5-Hydroxy-3,7,4'-trimethoxyflavone	Flavonoids	Flavones	33174	38802	38518	9	9	9	1.09765	0.00246214	0.00660779	0.000244357	-11.9987	down
pmn001519	C15H12O9	Galloyl Methyl gallate	Tannins	Tannin	7082.5	6212.7	6171.9	9	9	9	1.0976	0.00209361	0.00597631	0.00138696	-9.49386	down
pme0321	C21H20O10	Kaempferol-7-O-rhamnoside*	Flavonoids	Flavonols	5748.6	6399.6	7334.3	9	9	9	1.09754	0.00499761	0.0098695	0.00138586	-9.495	down
mws0919	C21H20O10	Kaempferol-3-O-rhamnoside (Afzelin)(Kaempferin)*	Flavonoids	Flavonols	5748.6	6399.6	7334.3	9	9	9	1.09754	0.00499761	0.0098695	0.00138586	-9.495	down
mws0072	C21H20O10	Apigenin-5-O-glucoside*	Flavonoids	Flavones	213510	280570	309930	9	9	9	1.09751	0.0111475	0.0184227	3.35817e-05	-14.862	down
mws1434	C21H20O10	Apigenin-6-C-glucoside (Isovitexin)*	Flavonoids	Flavonoid carbonoside	105200	109640	124510	60983	55447	49371	1.07121	0.00261107	0.00666565	0.488584	-1.03332	down
mws0045	C21H20O11	Quercetin-3-O-rhamnoside(Quercitrin)	Flavonoids	Flavonols	24721	26566	21752	8043.5	10005	7447	1.07546	0.00187509	0.00545165	0.349067	-1.51842	down
pmn001416	C24H20O9	Catechin-(7,8-bc)-4α-(3,4-dihydroxyphenyl)-dihydro-2-(3H)-one	Flavonoids	Flavanols	7613.8	11204	9142.7	9	9	9	1.09711	0.0122513	0.0195274	0.000965648	-10.0162	down
Lmnp002845	C22H22O11	Hispidulin-8-C-glucoside	Flavonoids	Flavonoid carbonoside	108480	148010	151470	23717	28677	37140	1.07296	0.011583	0.0187478	0.219468	-2.18792	down
HJAP011	C22H22O11	Chrysoeriol-8-C-glucoside (Scoparin)	Flavonoids	Flavonoid carbonoside	86997	110060	115180	10783	22199	22688	1.05502	0.00391952	0.00815053	0.178294	-2.48767	down
pmp000120	C22H22O11	Diosmetin-6-C-glucoside	Flavonoids	Flavones	71818	81979	100580	27507	14642	14535	1.04962	0.00620706	0.0115326	0.222835	-2.16595	down
pmb2975	C23H26O11	Hesperetin-3'-O-glucuronide	Flavonoids	Flavanonols	3697.2	7482.4	7553.5	9	9	9	1.09489	0.0392868	0.0503513	0.0014413	-9.43841	down
pmp000531	C26H30O11	Phellamurin	Flavonoids	Flavanonols	137110	178840	164350	46217	49074	51285	1.08709	0.0110123	0.0182956	0.305176	-1.71229	down
Lmtp002822	C25H26O13	Apigenin-6-C-arabinoside-8-C-xyloside*	Flavonoids	Flavonoid carbonoside	2326300	3090800	3473600	698660	696920	725890	1.08287	0.0215482	0.0304781	0.238617	-2.06723	down
pmp001110	C25H26O13	Apigenin-6-C-xyloside-8-C-arabinoside	Flavonoids	Flavonoid carbonoside	926720	1156800	1045400	252400	262790	220260	1.09003	0.00544435	0.0102983	0.235049	-2.08897	down
Lmtp002942	C25H26O13	Apigenin-6,8-di-C-arabinoside*	Flavonoids	Flavonoid carbonoside	2392100	3284600	3165500	786640	716050	761130	1.08505	0.0154877	0.0237746	0.256025	-1.96565	down
pmp000980	C27H32O12	Maohuoside A	Flavonoids	Flavonols	85980	137190	113950	24115	31450	43374	1.03714	0.0220205	0.0310064	0.293483	-1.76865	down
mws1292	C26H28O14	Isoschaftoside*	Flavonoids	Flavonoid carbonoside	2878100	3663000	3551800	1238700	1254200	1275900	1.08485	0.0131322	0.0207211	0.373411	-1.42116	down
mws1660	C26H28O14	Schaftoside*	Flavonoids	Flavonoid carbonoside	57055	62472	63405	9334.6	10742	16613	1.07439	9.00241e-05	0.000979531	0.200564	-2.31786	down
Lmtp002474	C26H28O14	Apigenin-6-C-(2''-glucosyl)arabinoside*	Flavonoids	Flavonoid carbonoside	2836700	3650500	3726200	1612800	1677900	1439500	1.06235	0.0185084	0.0269057	0.463137	-1.11049	down
pmp000236	C26H28O14	Apigenin-6-C-glucoside-8-O-xylcoside*	Flavonoids	Flavonoid carbonoside	66345	92255	97024	28972	16020	11475	1.02549	0.00796952	0.0137496	0.220899	-2.17854	down
mws0046	C27H32O14	Naringenin-7-O-Neohesperidoside(Naringin)	Flavonoids	Flavanones	430300	443900	416250	224530	205450	187190	1.08439	0.000130303	0.00113653	0.47826	-1.06413	down
mws1073	C27H30O15	Apigenin-6,8-di-C-glucoside	Flavonoids	Flavones	139030	169990	206180	59599	36685	65124	1.03404	0.0141839	0.0222688	0.313292	-1.67442	down
Lmyp004052	C30H26O14	Quercetin-3-O-(6''-p-Coumaroyl)galactoside*	Flavonoids	Flavonols	17318	18117	20583	9	9	9	1.09767	0.00276043	0.00673502	0.000481988	-11.0187	down
Lmyn001269	C27H30O16	Kaempferol-3-O-sophoroside	Flavonoids	Flavones	5810.8	6676.5	6386.1	9	9	9	1.09763	0.00163559	0.00498618	0.00143058	-9.44918	down
Lmpp003228	C31H29O15+	Petunidin-3-O-(6''-O-caffeoyl)glucoside	Flavonoids	Anthocyanidins	29720	43333	33174	12033	13529	14465	1.06336	0.0295473	0.039819	0.376806	-1.40811	down
Xmbp008275	C39H32O15	Castanoside B [Kaempferol-3-O-(4'',6''-di-p-coumaroyl)mannoside]	Flavonoids	Flavones	2855.9	2825.1	4110.3	9	9	9	1.09693	0.0165016	0.0247918	0.00275755	-8.5024	down
pmb2991	C33H40O19	Apigenin-7-O-glucoside-4'-O-rutinoside	Flavonoids	Flavones	579790	557010	544540	225110	218130	238020	1.09524	6.74488e-05	0.000962678	0.405189	-1.30333	down
pmb0721	C39H42O20	Tricin-7-O-(2''-feruloyl)glucoside-5-O-glucoside	Flavonoids	Flavones	32919	88500	26892	9	9	9	1.0933	0.127881	0.147627	0.00018205	-12.4234	down
pme0309	C8H8O5	3-O-Methylgallic Acid	Tannins	Tannin	7655.7	8804.7	14730	86412	82847	88239	1.07854	2.22656e-05	0.00063558	8.25568	3.04539	up
pme2960	C15H12O5	Naringenin chalcone*	Flavonoids	Chalcones	40260	38489	33545	106660	113230	108420	1.09179	1.38277e-05	0.000482432	2.92366	1.54778	up
MWSHY0017	C15H12O5	(±)-Naringenin; 4',5,7-Trihydroxyflavanone*	Flavonoids	Flavones	37525	47330	45604	119870	131060	126540	1.08638	5.16421e-05	0.000897654	2.8934	1.53277	up
pme3475	C15H12O5	Butin*	Flavonoids	Flavanones	38849	28452	35435	170930	108220	114800	1.06402	0.0368697	0.0478392	3.83459	1.93907	up
pme1201	C15H14O5	Phloretin	Flavonoids	Chalcones	9	9	9	43884	2989	4783.1	1.06807	0.326135	0.348321	1913.19	10.9018	up
pme0088	C15H10O6	Luteolin (5,7,3',4'-Tetrahydroxyflavone)	Flavonoids	Flavones	9	9	9	18802	21579	20233	1.09763	0.00157241	0.00484054	2244.96	11.1325	up
mws1034	C16H14O5	Isosakuranetin (5,7-Dihydroxy-4'-methoxyflavanone)	Flavonoids	Flavanones	9	9	9	11007	12927	13533	1.09745	0.00370123	0.00796017	1387.67	10.4384	up
Cmsp008121	C16H14O5	7-O-Methylnaringenin*	Flavonoids	Flavones	3189.6	5696.4	4186.2	21994	23863	21665	1.07589	5.56974e-05	0.000897654	5.16531	2.36886	up
Lmdp003110	C15H12O6	2,6,7,4'-Tetrahydroxyisoflavanone	Flavonoids	Dihydroisoflavones	9	9	9	203880	205730	211010	1.09771	0.000106618	0.00104619	22985.9	14.4885	up
mws0064	C15H12O6	Eriodictyol (5,7,3',4'-Tetrahydroxyflavanone)	Flavonoids	Flavanones	9	9	9	17635	13042	15335	1.09748	0.00739914	0.0129074	1704.15	10.7348	up
mws0054	C15H14O6	Catechin	Flavonoids	Flavanols	9	9	9	23821	22496	28499	1.09745	0.00529214	0.0101947	2770.96	11.4362	up
pmp001204	C17H14O5	Apigenin-7,4'-dimethyl ether	Flavonoids	Flavones	11562	17584	19191	309230	350310	319340	1.0914	0.00114689	0.00381963	20.2512	4.33993	up
Lmjp004941	C16H12O6	Rhamnocitrin (7-Methylkaempferol)*	Flavonoids	Flavonols	73305	92427	93883	965620	876940	889640	1.09489	0.000645604	0.00286847	10.524	3.39562	up
mws0058	C16H12O6	Diosmetin (5,7,3'-Trihydroxy-4'-methoxyflavone)	Flavonoids	Flavones	98802	116920	117550	1168000	1173300	1122600	1.09636	3.97197e-05	0.0007795	10.3936	3.37763	up
pmp000001	C16H12O6	Hispidulin (5,7,4'-Trihydroxy-6-methoxyflavone)*	Flavonoids	Flavones	71252	80973	87235	880340	879050	851040	1.09627	7.63816e-06	0.00039973	10.9013	3.44643	up
MWS20189	C16H12O6	Tectorigenin*	Flavonoids	Isoflavones	64423	81098	84586	892190	881150	804890	1.09471	0.000750583	0.00302158	11.2045	3.486	up
Lmmp005689	C16H12O6	Cajanin	Flavonoids	Isoflavones	6566.8	5619.5	6122.3	59544	64235	62804	1.09657	0.000398766	0.00215884	10.191	3.34922	up
Lmhn004976	C16H12O6	Aracarpene 2*	Flavonoids	Isoflavones	99600	109900	111780	1207600	1144400	1090500	1.09699	0.000931422	0.00344078	10.715	3.42155	up
Lmhn005110	C16H12O6	Aracarpene 1*	Flavonoids	Isoflavones	82569	83002	78774	667080	781870	782950	1.09614	0.00331861	0.00760616	9.13422	3.19128	up
Zmap007870	C16H14O6	Blumeatin*	Flavonoids	Flavanones	9	9	9	100790	83954	96944	1.09765	0.00293025	0.00691804	10432.9	13.3489	up
Cmsp007228	C16H14O6	7-O-Methyleriodictyol*	Flavonoids	Flavanols	9	9	9	104150	84091	94345	1.09766	0.00375907	0.00796946	10466.1	13.3534	up
mws0044	C15H12O7	Dihydroquercetin(Taxifolin)	Flavonoids	Flavanonols	6534	9458.5	7695.6	50528	50373	36927	1.08316	0.0115572	0.0187478	5.81845	2.54063	up
pmp000106	C18H16O5	5,7,4'-Trimethoxyflavone	Flavonoids	Flavones	9	9	9	6478.9	4840.3	8025	1.09648	0.0197875	0.0286326	716.452	9.48473	up
mws0066	C16H12O7	Isorhamnetin	Flavonoids	Flavonols	9	9	9	10572	11461	10125	1.09769	0.00134126	0.00430532	1191.04	10.218	up
Lmmp006082	C17H16O6	Cajanol	Flavonoids	Isoflavones	9	9	9	10561	14506	13267	1.09724	0.00821845	0.014025	1419.78	10.4714	up
pmf0392	C17H16O6	Persicogenin (5,3'-dihydroxy-7,4'-dimethoxyflavanone)	Flavonoids	Flavanones	174600	222410	222430	7964300	8662000	8299000	1.09651	0.000576128	0.00274097	40.2384	5.3305	up
mws0744	C15H12O8	Dihydromyricetin (Ampelopsin)	Flavonoids	Flavanonols	45870	69378	49532	118070	128040	121080	1.04722	0.00538088	0.01024	2.22837	1.15599	up
pmp000107	C18H16O6	Monohydroxy-trimethoxyflavone	Flavonoids	Flavones	9	9	9	8432.5	7537.7	9344.5	1.09747	0.00380706	0.00796946	937.581	9.8728	up
Lmzp004885	C17H14O7	Tricin (5,7,4'-Trihydroxy-3',5'-dimethoxyflavone)	Flavonoids	Flavones	148040	205800	191780	451390	439640	405920	1.06773	0.000466606	0.00240187	2.37702	1.24915	up
Lmjp005016	C17H14O7	Cirsiliol (3',4',5-Trihydroxy-6,7-Dimethoxyflavone)	Flavonoids	Flavanones	4671.1	6009.6	5395.3	12258	12115	12335	1.08118	0.00253516	0.00666565	2.2834	1.19119	up
MWSHY0118	C19H18O6	5,6,7,4'-Tetramethoxyflavone*	Flavonoids	Flavones	40895	44480	46648	246650	240640	235590	1.09646	1.26049e-05	0.000482432	5.47541	2.45297	up
MWSHY0128	C19H18O6	5,7,8,4'-Tetramethoxyflavone*	Flavonoids	Flavones	16014	18932	17636	46020	43575	42351	1.09059	6.41557e-05	0.000959281	2.50934	1.32731	up
Lmsp009872	C19H18O6	3',4',5,7-Tetramethoxyflavone; Luteolin Tetramethyl Ether*	Flavonoids	Flavones	21402	23763	21135	117460	109960	124880	1.09556	0.00147121	0.00466626	5.31373	2.40972	up
Zmhp004065	C18H16O7	7,8-Dihydroxy-5,6,4'-trimethoxyflavone*	Flavonoids	Flavones	16111	19916	15700	45531	47101	45617	1.08542	0.000685145	0.00286847	2.67267	1.41828	up
pmp000786	C18H16O7	Eupatorin; 3',5-Dihydroxy-4',6,7-Trimethoxyflavone*	Flavonoids	Flavones	16111	19916	15700	45531	47101	45617	1.08542	0.000685145	0.00286847	2.67267	1.41828	up
pmp000006	C18H16O7	Eupatilin (5,7-Dihydroxy-3',4',6-Trimethoxyflavone)*	Flavonoids	Flavones	16111	19916	15700	45531	47101	45617	1.08542	0.000685145	0.00286847	2.67267	1.41828	up
mws1002	C17H14O8	Syringetin	Flavonoids	Flavones	9	9	9	1895.5	3483.4	2170.3	1.0953	0.0361275	0.0472668	279.6	8.12722	up
Zmsp007375	C20H20O7	3,5,7,3'4'-Pentamethoxyflavone*	Flavonoids	Flavones	26057	33132	23891	146360	148240	125520	1.08837	0.00156722	0.00484054	5.05681	2.33823	up
MWSHY0027	C20H20O7	Tangeretin (4',5,6,7,8-Pentamethoxyflavone)	Flavonoids	Flavones	161470	181530	175060	352990	357840	359160	1.09259	0.000389837	0.00214752	2.06538	1.04641	up
mws1313	C20H20O7	Sinensetin (5,6,7,3',4'-pentamethoxyflavone)	Flavonoids	Flavones	52980	41039	44403	234250	262890	280700	1.09114	0.00244629	0.00660779	5.61934	2.4904	up
mws0043	C21H22O8	Nobiletin (5,6,7,8,3',4'-Hexamethoxyflavone)	Flavonoids	Flavones	287180	341080	310600	1538600	1513000	1536400	1.09563	6.17813e-06	0.000390363	4.88678	2.28888	up
pma6218	C21H22O9	O-MethylNaringenin-8-C-arabinoside	Flavonoids	Flavones	168460	190440	174180	366050	340240	360470	1.08972	7.93024e-05	0.000979531	2.00113	1.00081	up
Hmhp002834	C20H19O10+	Cyanidin 3-xyloside*	Flavonoids	Anthocyanidins	9	9	9	560390	605700	602790	1.09769	0.000616148	0.00284515	65514.1	15.9995	up
Smlp002532	C20H19O10+	Cyanidin-3-O-arabinoside*	Flavonoids	Anthocyanidins	9	9	9	560390	605700	602790	1.09769	0.000616148	0.00284515	65514.1	15.9995	up
pmp000117	C22H24O9	3,5,6,7,8,3',4'-Heptamethoxyflavone	Flavonoids	Flavonols	74306	109950	99525	410990	414070	410780	1.0842	0.00100358	0.00358096	4.35491	2.12264	up
pme3392	C21H21O10+	Pelargonidin-3-O-glucoside	Flavonoids	Anthocyanidins	9	9	9	1526000	1552800	1574100	1.09771	8.04906e-05	0.000979531	172330	17.3948	up
mws2186	C20H18O11	Avicularin(Quercetin-3-O-α-L-arabinofuranoside)	Flavonoids	Flavonols	16813	17797	24761	84998	75672	69893	1.0773	0.00115562	0.00381963	3.88343	1.95733	up
Lmdp003509	C20H18O11	Quercetin-3-O-xyloside (Reynoutrin)	Flavonoids	Flavonols	18819	18742	23161	99688	97312	85106	1.09104	0.00177224	0.00529983	4.64586	2.21595	up
HJN087	C21H22O10	Naringenin-4'-O-glucoside*	Flavonoids	Flavanones	15228	21237	17918	169640	168910	167380	1.09382	1.8685e-05	0.00058671	9.30309	3.21771	up
Lmlp006175	C21H22O10	Isosalipurposide (Phlorizin Chalcone)*	Flavonoids	Chalcones	13919	22532	18790	157500	194350	180480	1.08781	0.00311571	0.00724691	9.6365	3.26851	up
HJN090	C21H22O10	Butin-7-O-glucoside*	Flavonoids	Flavanones	19728	22799	21423	159900	166840	175830	1.09629	0.000683963	0.00286847	7.8588	2.97431	up
mws1179	C21H22O10	Naringenin-7-O-glucoside (Prunin)*	Flavonoids	Flavanones	3922.9	6043.9	4615.1	38883	38333	35255	1.08949	0.000102874	0.00104201	7.71306	2.9473	up
pmn001697	C21H18O11	Apigenin-7-O-glucuronide	Flavonoids	Flavones	9	9	9	80577	92062	96214	1.09758	0.00271256	0.00673502	9957.52	13.2816	up
Hmcp002316	C21H20O11	Isorhamnetin-3-O-arabinoside	Flavonoids	Flavonols	9	9	9	43591	54029	46805	1.09758	0.0040866	0.00838687	5349.07	12.3851	up
Xmyp005654	C21H20O11	Kaempferol-4'-O-glucoside*	Flavonoids	Flavonols	177340	139360	255240	1894900	2135900	2066700	1.0849	0.000238898	0.00173269	10.6611	3.41428	up
Lmlp003531	C21H20O11	Luteolin-3'-O-glucoside*	Flavonoids	Flavones	9	9	9	1912600	1809900	1830600	1.09773	0.000286869	0.00183831	205670	17.65	up
mws0089	C21H20O11	Kaempferol-7-O-glucoside	Flavonoids	Flavonols	19846	11916	10703	177060	156020	155310	1.08478	0.000658035	0.00286847	11.501	3.52369	up
mws0913	C21H20O11	Kaempferol-3-O-galactoside (Trifolin)	Flavonoids	Flavonols	15247	20052	25623	136570	233410	123100	1.06735	0.0525617	0.0660175	8.09363	3.01679	up
Hmpp003270	C21H20O11	Luteolin-4'-O-glucoside	Flavonoids	Flavones	122210	126570	148260	2170800	2021600	2073900	1.09647	0.000338059	0.00197384	15.7825	3.98026	up
Lmtn002796	C21H22O11	Aromadendrin-7-O-glucoside*	Flavonoids	Flavanonols	9	9	9	2030000	2413400	2132000	1.09767	0.00272483	0.00673502	243533	17.8938	up
pmb3023	C21H22O11	Eriodictyol-8-C-glucoside*	Flavonoids	Flavanones	9	9	9	1007700	964670	1175600	1.09761	0.00373961	0.00796946	116591	16.8311	up
Lmzn001894	C21H18O12	Kaempferol-3-O-glucuronide*	Flavonoids	Flavonols	9	9	9	84095	93220	100350	1.09758	0.00257379	0.00666565	10283.9	13.3281	up
pmn001702	C21H18O12	Tetahydroxyflavone-7-O-glucuronide*	Flavonoids	Flavones	9	9	9	78903	74291	83103	1.09767	0.00104239	0.00361631	8751.74	13.0954	up
pmb3012	C22H22O11	Chrysoeriol-7-O-glucoside	Flavonoids	Flavones	32395	46293	46702	451760	365000	286400	1.08383	0.0199713	0.0287659	8.79783	3.13715	up
Lmjp003655	C22H22O11	6-C-MethylKaempferol-3-glucoside	Flavonoids	Flavones	641920	694740	801480	14959000	17997000	17054000	1.09585	0.00308293	0.00722418	23.3895	4.54779	up
Hmmp004965	C22H22O11	Diosmetin-7-O-glucoside*	Flavonoids	Flavones	533560	723400	723190	15837000	15725000	16202000	1.0954	6.21598e-06	0.000390363	24.1214	4.59224	up
Zmgp004060	C22H22O11	paratensein-7-O-glucoside	Flavonoids	Flavones	495820	731290	775680	16610000	14736000	16296000	1.09306	0.00117287	0.00383627	23.7878	4.57215	up
pmp000579	C22H22O11	Diosmetin-7-O-galactoside*	Flavonoids	Flavones	593650	693240	699500	16715000	15832000	16907000	1.09697	0.00038529	0.00214752	24.8964	4.63787	up
Hmgp002189	C22H22O11	Hispidulin-7-O-Glucoside	Flavonoids	Flavones	479130	640570	769920	14903000	15822000	15807000	1.09335	0.00017153	0.00141738	24.6251	4.62206	up
mws0061	C21H20O12	Quercetin-3-O-galactoside (Hyperin)	Flavonoids	Flavonols	170080	60501	67553	1919900	1574000	2098800	1.07145	0.005491	0.0103244	18.759	4.22951	up
Smgp004575	C21H20O12	Quercetin-5-O-β-D-glucoside	Flavonoids	Flavonols	354870	139060	124420	2937300	2991800	2928400	1.06796	0.000349882	0.00199751	14.3244	3.8404	up
Zmhp004034	C21H20O12	Rhodiolgin	Flavonoids	Flavonols	9	9	9	993360	706470	426660	1.09695	0.0493584	0.0622431	78758.9	16.2652	up
pmp001309	C21H20O12	6-Hydroxykaempferol-7-O-glucoside	Flavonoids	Flavonols	83566	99880	107240	806810	863950	1237000	1.08734	0.0228346	0.0320093	10.0031	3.32237	up
Hmcn001884	C21H20O12	6-Hydroxyluteolin 5-glucoside	Flavonoids	Flavones	153350	52911	47504	902510	856460	942090	1.05226	8.68755e-05	0.000979531	10.6439	3.41196	up
mws0856	C21H20O12	Spiraeoside*	Flavonoids	Flavonols	150480	48671	50977	875500	927670	913490	1.05401	0.00029505	0.00185291	10.8611	3.4411	up
MWSHY0046	C21H20O12	Quercetin-3-O-glucoside (Isoquercitrin)	Flavonoids	Flavonols	396150	107660	135890	2985100	2597000	3015500	1.05379	0.00019109	0.00146347	13.4401	3.74847	up
mws1329	C21H20O12	Quercetin-7-O-glucoside*	Flavonoids	Flavonols	161490	28428	36924	1050600	1179800	1202700	1.03339	8.01162e-05	0.000979531	15.1343	3.91975	up
Lmzp002365	C22H24O11	Hesperetin-7-O-glucoside	Flavonoids	Flavones	112680	15937	47279	536110	628710	574490	1.00396	0.000188305	0.00146347	9.88829	3.30572	up
pme1598	C22H24O11	Hesperetin-5-O-glucoside	Flavonoids	Flavanonols	205520	66356	73486	1154700	1024600	1097300	1.05063	9.64979e-05	0.00101001	9.48744	3.24602	up
Zmbp003860	C23H23O11+	Pelargonidin-3-O-(6''-O-acetyl)glucoside	Flavonoids	Anthocyanidins	9	9	9	8218100	8250300	8050900	1.09773	5.71754e-05	0.000897654	908122	19.7925	up
pmp000583	C22H20O12	Diosmetin-7-O-glucuronide	Flavonoids	Flavones	25861	26392	24023	9292000	9716900	8791900	1.0977	0.000835593	0.00323921	364.476	8.50968	up
Lmmp003783	C21H18O13	Quercetin-3-O-glucuronide	Flavonoids	Flavonols	9	9	9	149500	173290	159580	1.09766	0.00183358	0.00543155	17865.6	14.1249	up
Hmcp002207	C22H22O12	Isorhamnetin-7-O-glucoside (Brassicin)*	Flavonoids	Flavonols	57067	57043	63737	1903200	2086700	1896100	1.09723	0.00105956	0.00361631	33.0959	5.04858	up
pma0214	C22H22O12	6-C-Methylquercetin-3-O-glucoside*	Flavonoids	Flavonols	32210	73332	59700	451070	592620	1027300	1.05748	0.0663924	0.0824001	12.5331	3.64767	up
Lmjp002906	C22H22O12	Rhamnetin-3-O-Glucoside*	Flavonoids	Flavonols	67486	68161	90635	1928300	2003200	1963100	1.09553	2.44982e-05	0.000636646	26.0498	4.7032	up
Lmjp003295	C22H22O12	6-Methoxykaempferol-3-O-glucoside*	Flavonoids	Flavonols	61135	87849	77773	795320	432890	378530	1.06291	0.0717155	0.0879635	7.08573	2.82492	up
Hmgp002036	C22H22O12	Nepetin-7-O-glucoside(Nepitrin)	Flavonoids	Flavones	57067	57043	63737	1903200	2086700	1896100	1.09723	0.00105956	0.00361631	33.0959	5.04858	up
Lmmn003398	C23H22O12	Kaempferol-3-O-(6''-acetyl)glucoside	Flavonoids	Flavonols	9	9	9	226920	244860	168620	1.09756	0.0114249	0.0186845	23718.5	14.5337	up
Lmpp003059	C23H23O12+	Cyanidin-3-O-(6''-O-acetyl)glucoside	Flavonoids	Anthocyanidins	9	9	9	88665000	76975000	90662000	1.09769	0.00248707	0.00661814	9.49267e+06	23.1784	up
Lmgp003546	C23H24O12	4',5'-Dihydroxy-6,8-dimethoxyisoflavone-7-O-galactoside*	Flavonoids	Isoflavones	183490	262050	243450	477030	474920	500320	1.05386	0.00451757	0.00909306	2.10782	1.07575	up
Hmgp002238	C23H24O12	Jaceosidin-7-O-Glucoside	Flavonoids	Flavones	251250	261770	152340	485000	531480	487830	1.01414	0.00715754	0.0127211	2.2609	1.17689	up
pmn001642	C23H20O13	Kaempferol-3-O-(2''-O-acetyl)glucuronide	Flavonoids	Flavonols	191560	187700	146070	359620	365290	350560	1.0677	0.00365187	0.00790818	2.04723	1.03367	up
Lmxp003068	C23H21O13+	Cyanidin-3-O-(6''-O-malonyl)arabinoside	Flavonoids	Anthocyanidins	9	9	9	327290	344780	342470	1.0977	0.000263037	0.00177286	37575.6	15.1975	up
Smpp002603	C24H25O12+	Peonidin-3-O-(6''-O-Acetyl)glucoside	Flavonoids	Anthocyanidins	9	9	9	51130000	67319000	75651000	1.09751	0.0121542	0.0194715	7.18889e+06	22.7773	up
Zmsp004363	C23H22O13	Quercetin-3-O-(6''-O-acetyl)glucoside	Flavonoids	Flavonols	9	9	9	2483300	2638200	2602200	1.0977	0.000330296	0.00197384	286063	18.126	up
pmb3045	C23H22O13	Tricin-7-O-Glucuronide*	Flavonoids	Flavones	9	9	9	234380	247000	284250	1.09758	0.00342332	0.00764716	28356.7	14.7914	up
Hmln002199	C23H22O13	Quercetin-3-O-(6''-O-acetyl)galactoside*	Flavonoids	Flavonols	9	9	9	969640	1365900	817310	1.09742	0.0233587	0.0325983	116772	16.8333	up
pmb0554	C24H23O13+	Pelargonidin-3-O-(6''-O-malonyl)glucoside	Flavonoids	Anthocyanidins	564.87	9	9	4341800	3936500	4250300	1.0685	0.000862541	0.0033029	21494.7	14.3917	up
pmn001644	C23H20O14	Quercetin-3-O-(2''-O-acetyl)glucuronide	Flavonoids	Flavonols	9	9	9	770830	861760	543040	1.09751	0.0166597	0.0247921	80578.9	16.2981	up
pma0791	C24H24O13	Naringenin-7-O-(6''-malonyl)glucoside	Flavonoids	Flavanols	31154	38094	36821	72871	78492	65476	1.07094	0.00276693	0.00673502	2.04432	1.03162	up
Li512111	C24H24O13	Isorhamnetin-3-O-(6''-acetylglucoside)	Flavonoids	Flavonols	4898.2	5860.5	7071.5	1689200	1886800	1773700	1.09676	0.00103441	0.00361631	300.036	8.22899	up
pmp000235	C27H26O11	Salcolin B*	Flavonoids	Flavones	168280	252270	194690	451040	426150	416110	1.0466	0.00532666	0.0101986	2.10211	1.07184	up
Lmmp003817	C24H22O14	Kaempferol-3-O-(6''-malonyl)glucoside*	Flavonoids	Flavonols	47332	67464	42004	4604700	3265500	5091100	1.09354	0.0159488	0.0241929	82.6614	6.36914	up
Lmdp004892	C24H22O14	Kaempferol-3-O-(6''-malonyl)galactoside*	Flavonoids	Flavonols	44204	70819	46398	3519500	4052500	4202100	1.09478	0.00281267	0.00679369	72.9403	6.18864	up
pmb0542	C24H23O14+	Cyanidin-3-O-(6''-O-malonyl)glucoside	Flavonoids	Anthocyanidins	9	9	9	169940000	172970000	169780000	1.09772	3.68679e-05	0.000771768	1.89885e+07	24.1786	up
pmp000588	C25H24O14	Diosmetin-7-O-(6''-malonyl)glucoside	Flavonoids	Flavones	7466.7	10767	8074.5	143610	155590	150780	1.09437	0.000242797	0.00173269	17.1042	4.09628	up
pmb0608	C25H24O14	Chrysoeriol-7-O-(6''-malonyl)glucoside	Flavonoids	Flavones	87007	98039	109520	1399500	1813900	1796200	1.09411	0.00722244	0.0127407	17.0067	4.08803	up
pmp000589	C24H22O15	Quercetin-7-O-(6''-malonyl)glucoside*	Flavonoids	Flavonols	9	9	9	3833400	3417900	3664100	1.09772	0.00109734	0.003705	404274	18.625	up
Hmln002189	C24H22O15	Quercetin-3-O-(6''-malonyl)galactoside*	Flavonoids	Flavonols	9	9	9	3495100	3800100	3844500	1.09768	0.000873512	0.00330461	412581	18.6543	up
HJAP064	C25H24O15	Isorhamnetin-3-O-(6''-malonyl)glucoside*	Flavonoids	Flavonols	17454	18807	19765	5149900	5472200	5228200	1.09757	0.00033945	0.00197384	282.91	8.1442	up
Zmhp005139	C25H24O15	Tamarixetin-3-O-(6''-malonyl)glucoside*	Flavonoids	Flavonols	32587	34626	33268	5457100	5652100	6386800	1.0974	0.00237433	0.00648295	174.122	7.44396	up
Lmtp004126	C24H22O16	Myricetin-3-O-(6''-malony)glucoside	Flavonoids	Flavonols	9	9	9	821250	765940	942230	1.09761	0.00379007	0.00796946	93682.2	16.5155	up
Zmxp005470	C26H26O15	Tricin-7-O-(6''-O-malonyl)glucoside	Flavonoids	Flavones	499710	777060	764810	2016200	2367100	2106000	1.06223	0.000488754	0.0024753	3.17857	1.66838	up
mws0836	C30H26O12	Procyanidin B1*	Tannins	Proanthocyanidins	9	9	9	5688.6	7527.1	7796.3	1.09706	0.00884523	0.0149323	778.222	9.60404	up
Smsp002643	C27H31O14+	Pelargonidin-3-O-rutinoside	Flavonoids	Anthocyanidins	18968	28753	11229	2309100	2316100	2221300	1.09128	0.000125137	0.00113653	116.141	6.85973	up
Lmjp001877	C26H29O15+	Cyanidin-3-O-sambubioside [Cyanidin-3-O-(2''-O-xylosyl)glucoside]	Flavonoids	Anthocyanidins	9	9	9	265490	350480	122750	1.09593	0.0657135	0.081881	27360	14.7398	up
Lmfn004769	C27H22O15	Quercetin-3-O-(4''-O-galloyl)arabinoside	Flavonoids	Flavonols	3804.9	5653.9	4892.6	15864	18154	15289	1.07582	0.000908005	0.00339421	3.43569	1.7806	up
MWSslk094	C30H26O13	Proanthocyanidins	Tannins	Proanthocyanidins	13779	16841	20826	614470	636590	641910	1.09508	8.56285e-05	0.000979531	36.7953	5.20145	up
Hmcp001829	C27H30O15	Quercetin-3,7-Di-O-rhamnoside	Flavonoids	Flavonols	9	9	9	184680	166320	209270	1.09757	0.00440951	0.00898811	20750.7	14.3409	up
pme1793	C27H31O15+	Pelargonidin-3,5-O-diglucoside	Flavonoids	Anthocyanidins	9	9	9	13088	21719	12036	1.09644	0.0365322	0.047598	1734.93	10.7607	up
pme1773	C27H31O15+	Cyanidin-3-O-rutinoside (Keracyanin)	Flavonoids	Anthocyanidins	236600	63308	53633	136220000	136170000	133190000	1.0889	5.19876e-05	0.000897654	1147.19	10.1639	up
pmb0562	C27H25O16+	Pelargonidin-3-O-(3'',6''-O-dimalonylglucoside)	Flavonoids	Anthocyanidins	9	9	9	4655600	4455200	4677900	1.09772	0.000237263	0.00173269	510693	18.9621	up
pmb3002	C28H32O15	Chrysoeriol-7-O-rutinoside	Flavonoids	Flavones	2717300	2939700	2856000	9799000	10391000	10026000	1.09657	0.000127064	0.00113653	3.5494	1.82757	up
pmp001080	C28H32O15	Diosmetin-7-O-Neohesperidoside (Neodiosmin)*	Flavonoids	Flavones	496150	620610	626300	1879600	2126800	2376900	1.08364	0.00521615	0.0101103	3.66212	1.87268	up
mws1661	C28H32O15	Diosmetin-7-O-rutinoside (Diosmin)*	Flavonoids	Flavones	6953100	8738900	8343400	22456000	23656000	25950000	1.08534	0.000772545	0.00307062	2.99816	1.58408	up
Hmgp002121	C31H28O13	Hispidulin-7-O-(6''-O-p-Coumaroyl)Glucoside	Flavonoids	Flavones	3632100	4811500	5325500	13110000	15354000	14514000	1.07254	0.000423394	0.00225332	3.12134	1.64216	up
Lmpp003977	C31H29O13+	Peonidin-3-O-(6''-O-p-Coumaroyl)glucoside	Flavonoids	Anthocyanidins	4663600	5757900	5600200	16673000	14899000	15613000	1.08781	0.000189086	0.00146347	2.94507	1.5583	up
Lmtp003079	C28H33O15+	Peonidin-3-O-rutinoside	Flavonoids	Anthocyanidins	9	9	9	67596000	64641000	68675000	1.09771	0.000323997	0.00197384	7.44119e+06	22.8271	up
pmb0665	C27H30O16	Luteolin-8-C-glucoside-7-O-glucoside	Flavonoids	Flavonoid carbonoside	9	9	9	291550	303350	254220	1.09772	0.00272581	0.00673502	31448.9	14.9407	up
Lmbp002592	C27H30O16	Kaempferol-3,7-di-O-glucoside*	Flavonoids	Flavones	9	9	9	93044	70192	73285	1.09761	0.00814374	0.0139734	8760.04	13.0967	up
Lmjp002461	C27H30O16	Quercetin-3-O-neohesperidoside*	Flavonoids	Flavonols	1008900	485450	499750	10035000	10387000	10361000	1.0821	5.8056e-06	0.000390363	15.437	3.94832	up
pmb0711	C27H30O16	Quercetin-7-O-rutinoside*	Flavonoids	Flavonols	898800	568990	432560	10787000	10190000	9961900	1.08583	3.67596e-05	0.000771768	16.2806	4.02508	up
Lmbp002336	C27H30O16	Quercetin-3-O-(2''-O-rhamnosyl)galactoside	Flavonoids	Flavonols	1008900	485450	499750	10035000	10387000	10361000	1.0821	5.8056e-06	0.000390363	15.437	3.94832	up
MWSHY0067	C27H30O16	Quercetin-3-O-rutinoside (Rutin)	Flavonoids	Flavonols	892830	516440	374940	9792800	9479800	8448800	1.08036	0.000697816	0.00288308	15.5371	3.95764	up
Lmsp004166	C27H30O16	Quercetin-3-O-glucoside-7-O-rhamnoside*	Flavonoids	Flavonols	909320	513810	456920	10397000	10825000	9994000	1.08593	2.63579e-05	0.000636646	16.6038	4.05344	up
pmn001583	C27H30O16	Quercetin-3-O-robinobioside	Flavonoids	Flavonols	375630	202650	237380	6761400	6163300	5141700	1.08902	0.00618192	0.0115326	22.1494	4.4692	up
Hmpp002612	C27H30O16	Luteolin-7-O-gentiobioside*	Flavonoids	Flavones	9	9	9	68218	92935	73285	1.09747	0.0091783	0.0153297	8682.89	13.084	up
pme1777	C27H31O16+	Cyanidin-3,5-O-diglucoside (Cyanin)	Flavonoids	Anthocyanidins	9	9	9	513890	555110	540250	1.0977	0.000504476	0.00251437	59601.9	15.8631	up
pmb0557	C27H25O17+	Cyanidin-3-O-(3'',6''-O-dimalonyl)glucoside	Flavonoids	Anthocyanidins	23817	7086.7	4332	11201000	10894000	10794000	1.08705	0.000120646	0.00113653	933.4	9.86635	up
Lmcp003751	C28H31O16+	"Cyanidin-3-O-(6""-O-acetyl-2""-O-xylosyl)glucoside"	Flavonoids	Anthocyanidins	9	9	9	4082800	4266000	3498800	1.09772	0.00341355	0.00764716	438800	18.7432	up
HJN051	C28H32O16	Tamarixetin-3-O-rutinoside	Flavonoids	Flavonols	212170	226990	197260	2379600	2647400	2101000	1.09579	0.00516576	0.0101075	11.2002	3.48545	up
Lmnp002584	C28H32O16	Hispidulin-8-C-(2''-O-glucosyl)glucoside	Flavonoids	Flavonoid carbonoside	12387	17174	34874	194100	202070	175890	1.05888	9.04663e-05	0.000979531	8.87809	3.15025	up
Zmxp004480	C28H32O16	Chrysoeriol-7-O-gentiobioside	Flavonoids	Flavones	36803	26925	52807	249630	299630	264750	1.07469	0.000829385	0.00323921	6.98511	2.80428	up
pmf0614	C28H33O16+	Peonidin-3,5-O-diglucoside	Flavonoids	Anthocyanidins	9	9	9	131910	121540	131800	1.0977	0.000716282	0.00292094	14268.5	13.8005	up
pmp001311	C27H30O17	6-Hydroxykaempferol-7,6'-O-Diglucoside	Flavonoids	Flavonols	9	9	9	17992	33741	23232	1.09646	0.0326861	0.0438608	2776.48	11.439	up
Lmsp003729	C27H30O17	Myricetin-3-O-rutinoside*	Flavonoids	Flavonols	9	9	9	543370	439780	456760	1.0977	0.00443681	0.00898811	53330	15.7027	up
Zmdp003457	C27H30O17	Myricetin-3-O-galactoside-3'-O-rhamnoside*	Flavonoids	Flavonols	9	9	9	538910	480750	448600	1.09773	0.00290331	0.00691804	54380	15.7308	up
Lmmp003487	C27H26O18	Luteolin-7-O-glucuronide-(2→1)-glucuronide	Flavonoids	Flavones	9	9	9	234260	270320	263830	1.09764	0.00187209	0.00545165	28459.6	14.7966	up
Lmgp004959	C29H34O16	Tricin-7-O-neohesperidoside	Flavonoids	Flavones	2102800	3231800	3036900	5755300	5739600	5283200	1.02467	0.00686723	0.0123926	2.00419	1.00302	up
Hmgp002080	C28H32O17	Patuletin-7-O-rutinoside	Flavonoids	Flavonols	7115.4	6255	10298	126870	124580	85482	1.08599	0.0155216	0.0237746	14.2355	3.83142	up
Hmgp001888	C28H32O17	Patuletin-3-O-rutinoside	Flavonoids	Flavonols	7115.4	6255	10298	126870	124580	85482	1.08599	0.0155216	0.0237746	14.2355	3.83142	up
pmb3014	C31H30O15	Luteolin-7-O-(6''-eudesmyl)glucoside	Flavonoids	Flavones	9	9	9	209290	205900	222590	1.09768	0.000573523	0.00274097	23621.5	14.5278	up
pmp001289	C28H28O18	Chrysoeriol-7-O-(2''-O-glucuronyl)glucuronide	Flavonoids	Flavones	9	9	9	1898100	1819100	2150700	1.09764	0.00260374	0.00666565	217330	17.7295	up
Zmbp002578	C29H33O17+	Cyanidin-3-O-(6''-O-acetyl)glucoside-5-O-glucoside	Flavonoids	Anthocyanidins	9	9	9	451340	446050	511600	1.09764	0.00199786	0.00575531	52184.8	15.6713	up
Hmqp003184	C29H30O18	Luteolin-7-O-(6''-malonyl)glucoside-5-O-arabinoside	Flavonoids	Flavones	6560.4	13075	11859	59820	71911	55143	1.06444	0.00405595	0.00837874	5.93356	2.5689	up
pmb0738	C34H34O16	Tricin-7-O-(2''-Sinapoyl)glucoside	Flavonoids	Flavones	13669	21153	17171	54271	57199	53819	1.07287	0.000668244	0.00286847	3.17906	1.6686	up
Lmzn001875	C33H42O19	Naringenin-7-O-Rutinoside-4'-O-glucoside	Flavonoids	Flavones	9555.3	12122	8510.4	22313	23480	17528	1.03162	0.0112241	0.0184522	2.09758	1.06872	up
Smsp001702	C33H41O20+	Cyanidin-3-O-rutinoside-5-O-glucoside	Flavonoids	Anthocyanidins	9	9	9	25317	28189	27082	1.09766	0.000968461	0.00349537	2984.74	11.5434	up
Lmtp001633	C34H43O20+	Peonidin-3-O-rutinoside-5-O-glucoside	Flavonoids	Anthocyanidins	9	9	9	134160	164010	156670	1.09758	0.00349038	0.00764716	16845.9	14.0401	up
pmb1108	C33H40O21	Luteolin-6,8-di-C-glucoside-7-O-glucoside	Flavonoids	Flavonoid carbonoside	9	9	9	6683.1	9582	5352.4	1.09645	0.0288074	0.0391581	800.648	9.64502	up
pmb0676	C38H40O19	Chrysoeriol-8-C-glucoside-7-O-(6''-feruloyl)glucoside	Flavonoids	Flavonoid carbonoside	72655	72557	68426	151990	192440	156160	1.08011	0.0166516	0.0247921	2.34317	1.22846	up
