# Supplementary material for: Integrated Metabolomic and Transcriptomic Analysis of Anthocyanin Metabolism in Wheat Pericarp
Source: Research Square preprint supplement (doi:10.21203/rs.3.rs-5030591/v1), 2024-12-05
Supplement: Supplementary file 4 [file a63f47f41060ef068ce6e5de.xlsx]

## Sheet: Table S2
Table S2: The differentially expressed MYB, bHLH and WD40 genes identified between Shiluan02-1 and Hengzi151.
id	Shiluan02-1-1	Shiluan02-1-2	Shiluan02-1-3	Hengzi151-1	Hengzi151-2	Hengzi151-3	TF	type
LOC123059745	0.100465	0.317924	0.204684	2.73396	2.43696	2.61339	bHLH	TF
LOC123112283	0.0339091	0.0393456	0.062177	0.252383	0.157651	0.154573	bHLH	TF
LOC123190100	0	0.0158128	0.0152708	321.822	326.325	320.043	bHLH	TF
LOC123072107	1.56264	1.11263	0.696432	0.145383	0.177679	0.17421	bHLH	TF
LOC123073527	2.25442	2.73477	2.78457	0	0	0	bHLH	TF
LOC123073529	0.314931	1.44961	0.991614	0	0.0578731	0	bHLH	TF
LOC123110986	9.4093	9.65043	8.98431	1.82483	1.91309	1.73982	bHLH	TF
LOC123161020	4.4923	5.31701	4.6303	0	0	0	bHLH	TF
LOC123046701	0.165802	0.0874477	0.405362	2.79205	3.3683	2.9575	MYB	TF
LOC123054556	0.263611	0.370758	0.375953	2.58335	2.57552	1.79379	MYB	TF
LOC123064990	0	0	0	2.30129	2.86059	1.95625	MYB	TF
LOC123073744	0	0	0	1.86709	1.93018	1.28305	MYB	TF
LOC123180688	0	0	0	1.27425	1.40698	0.645255	MYB	TF
LOC123190414	0.523839	0.533514	0.680836	6.3525	5.42226	5.76391	MYB	TF
LOC123088485	0.434659	0.316205	0.585286	0.0790189	0.136338	0.0247548	MYB	TF
LOC123174675	2.1257	2.24228	1.81896	0.284785	0.429691	0.286485	MYB	TF
LOC123156654	0.0392168	0.248205	0.292964	11.6329	11.1841	10.4476	WD40	TF
LOC123097277	0.679694	0.659612	0.581612	5.42567	5.79802	5.75217	WD40	TF
LOC123156362	0	0	0	4.76625	7.48602	5.1379	WD40	TF
LOC123096237	0	0	0	3.47944	4.326	4.05256	WD40	TF
LOC123149913	0	0	0	1.73655	1.91984	1.79739	WD40	TF
LOC123111305	7.73171	6.83599	6.57304	1.4779	1.37819	1.5881	WD40	TF
LOC123114245	5.49238	5.1089	4.35734	1.23877	1.02613	1.45141	WD40	TF
LOC123155841	9.94037	10.3212	10.7451	1.04368	1.71645	1.46678	WD40	TF
LOC123061622	6.71735	7.48604	7.5482	0.755649	0.679598	0.488202	WD40	TF
LOC123139623	4.99303	4.47579	5.40801	0.697719	0.738023	0.586714	WD40	TF
LOC123092024	5.12239	4.96136	4.72246	0.60357	0.519088	0.776824	WD40	TF
LOC123156333	0.0915293	0.143266	0.102263	0.532909	0.537149	0.579328	WD40	TF
LOC123098481	1.97527	1.93207	1.65853	0.412096	0.205692	0.237265	WD40	TF
LOC123145020	0.0225121	0.0237467	0.0131045	0.341096	0.494067	0.30595	WD40	TF
LOC123105799	1.71451	1.9113	1.23053	0.108758	0.157533	0.0193072	WD40	TF
LOC123112472	3.23373	3.27279	2.52627	0.0203281	0.0220834	0.0216523	WD40	TF
LOC123182272	1.7595	1.57214	1.25115	0	0	0	WD40	TF
LOC123139391	1.5211	2.47971	2.67645	0	0	0	WD40	TF
LOC123149732	1.00332	0.72277	0.897424	0	0	0	WD40	TF
LOC123156652	1.08831	1.148	1.12728	0	0	0	WD40	TF
LOC123156650	4.06006	5.13071	4.2931	0	0	0	WD40	TF
