# Supplementary material for: Integrated Metabolomic and Transcriptomic Analysis of Anthocyanin Metabolism in Wheat Pericarp
Source: Research Square preprint supplement (doi:10.21203/rs.3.rs-5030591/v1), 2024-12-05
Supplement: Supplementary file 5 [file cec4ec040656afc65d3b6bb3.xlsx]

## Sheet: Table S1
Supplementary Table 1：The differentially expressed flavonoids compounds in Shiluan02-1 and Hengzi151.
Index	Formula	Compounds	Class I	Class II	Shiluan02-1-1	Shiluan02-1-2	Shiluan02-1-3	Hengzi151-1	Hengzi151-2	Hengzi151-3	VIP	p_value	FDR	Fold_Change	Log2FC	Type
Lmbn006032	C15H10O7	Hypolaetin*	Flavonoids	Flavones	2922.7	2173.7	2658.3	9	9	9	1.09726	0.00717082	0.0127211	0.00348176	-8.16597	down
Lmjp007790	C18H16O6	5-Hydroxy-3,7,4'-trimethoxyflavone	Flavonoids	Flavones	33174	38802	38518	9	9	9	1.09765	0.00246214	0.00660779	0.000244357	-11.9987	down
pmn001519	C15H12O9	Galloyl Methyl gallate	Tannins	Tannin	7082.5	6212.7	6171.9	9	9	9	1.0976	0.00209361	0.00597631	0.00138696	-9.49386	down
pme0321	C21H20O10	Kaempferol-7-O-rhamnoside*	Flavonoids	Flavonols	5748.6	6399.6	7334.3	9	9	9	1.09754	0.00499761	0.0098695	0.00138586	-9.495	down
mws0919	C21H20O10	Kaempferol-3-O-rhamnoside (Afzelin)(Kaempferin)*	Flavonoids	Flavonols	5748.6	6399.6	7334.3	9	9	9	1.09754	0.00499761	0.0098695	0.00138586	-9.495	down
mws0072	C21H20O10	Apigenin-5-O-glucoside*	Flavonoids	Flavones	213510	280570	309930	9	9	9	1.09751	0.0111475	0.0184227	3.35817e-05	-14.862	down
mws1434	C21H20O10	Apigenin-6-C-glucoside (Isovitexin)*	Flavonoids	Flavonoid carbonoside	105200	109640	124510	60983	55447	49371	1.07121	0.00261107	0.00666565	0.488584	-1.03332	down
mws0045	C21H20O11	Quercetin-3-O-rhamnoside(Quercitrin)	Flavonoids	Flavonols	24721	26566	21752	8043.5	10005	7447	1.07546	0.00187509	0.00545165	0.349067	-1.51842	down
pmn001416	C24H20O9	Catechin-(7,8-bc)-4α-(3,4-dihydroxyphenyl)-dihydro-2-(3H)-one	Flavonoids	Flavanols	7613.8	11204	9142.7	9	9	9	1.09711	0.0122513	0.0195274	0.000965648	-10.0162	down
Lmnp002845	C22H22O11	Hispidulin-8-C-glucoside	Flavonoids	Flavonoid carbonoside	108480	148010	151470	23717	28677	37140	1.07296	0.011583	0.0187478	0.219468	-2.18792	down
HJAP011	C22H22O11	Chrysoeriol-8-C-glucoside (Scoparin)	Flavonoids	Flavonoid carbonoside	86997	110060	115180	10783	22199	22688	1.05502	0.00391952	0.00815053	0.178294	-2.48767	down
pmp000120	C22H22O11	Diosmetin-6-C-glucoside	Flavonoids	Flavones	71818	81979	100580	27507	14642	14535	1.04962	0.00620706	0.0115326	0.222835	-2.16595	down
pmb2975	C23H26O11	Hesperetin-3'-O-glucuronide	Flavonoids	Flavanonols	3697.2	7482.4	7553.5	9	9	9	1.09489	0.0392868	0.0503513	0.0014413	-9.43841	down
pmp000531	C26H30O11	Phellamurin	Flavonoids	Flavanonols	137110	178840	164350	46217	49074	51285	1.08709	0.0110123	0.0182956	0.305176	-1.71229	down
Lmtp002822	C25H26O13	Apigenin-6-C-arabinoside-8-C-xyloside*	Flavonoids	Flavonoid carbonoside	2326300	3090800	3473600	698660	696920	725890	1.08287	0.0215482	0.0304781	0.238617	-2.06723	down
pmp001110	C25H26O13	Apigenin-6-C-xyloside-8-C-arabinoside	Flavonoids	Flavonoid carbonoside	926720	1156800	1045400	252400	262790	220260	1.09003	0.00544435	0.0102983	0.235049	-2.08897	down
Lmtp002942	C25H26O13	Apigenin-6,8-di-C-arabinoside*	Flavonoids	Flavonoid carbonoside	2392100	3284600	3165500	786640	716050	761130	1.08505	0.0154877	0.0237746	0.256025	-1.96565	down
pmp000980	C27H32O12	Maohuoside A	Flavonoids	Flavonols	85980	137190	113950	24115	31450	43374	1.03714	0.0220205	0.0310064	0.293483	-1.76865	down
mws1292	C26H28O14	Isoschaftoside*	Flavonoids	Flavonoid carbonoside	2878100	3663000	3551800	1238700	1254200	1275900	1.08485	0.0131322	0.0207211	0.373411	-1.42116	down
mws1660	C26H28O14	Schaftoside*	Flavonoids	Flavonoid carbonoside	57055	62472	63405	9334.6	10742	16613	1.07439	9.00241e-05	0.000979531	0.200564	-2.31786	down
Lmtp002474	C26H28O14	Apigenin-6-C-(2''-glucosyl)arabinoside*	Flavonoids	Flavonoid carbonoside	2836700	3650500	3726200	1612800	1677900	1439500	1.06235	0.0185084	0.0269057	0.463137	-1.11049	down
pmp000236	C26H28O14	Apigenin-6-C-glucoside-8-O-xylcoside*	Flavonoids	Flavonoid carbonoside	66345	92255	97024	28972	16020	11475	1.02549	0.00796952	0.0137496	0.220899	-2.17854	down
mws0046	C27H32O14	Naringenin-7-O-Neohesperidoside(Naringin)	Flavonoids	Flavanones	430300	443900	416250	224530	205450	187190	1.08439	0.000130303	0.00113653	0.47826	-1.06413	down
mws1073	C27H30O15	Apigenin-6,8-di-C-glucoside	Flavonoids	Flavones	139030	169990	206180	59599	36685	65124	1.03404	0.0141839	0.0222688	0.313292	-1.67442	down
Lmyp004052	C30H26O14	Quercetin-3-O-(6''-p-Coumaroyl)galactoside*	Flavonoids	Flavonols	17318	18117	20583	9	9	9	1.09767	0.00276043	0.00673502	0.000481988	-11.0187	down
Lmyn001269	C27H30O16	Kaempferol-3-O-sophoroside	Flavonoids	Flavones	5810.8	6676.5	6386.1	9	9	9	1.09763	0.00163559	0.00498618	0.00143058	-9.44918	down
Lmpp003228	C31H29O15+	Petunidin-3-O-(6''-O-caffeoyl)glucoside	Flavonoids	Anthocyanidins	29720	43333	33174	12033	13529	14465	1.06336	0.0295473	0.039819	0.376806	-1.40811	down
Xmbp008275	C39H32O15	Castanoside B [Kaempferol-3-O-(4'',6''-di-p-coumaroyl)mannoside]	Flavonoids	Flavones	2855.9	2825.1	4110.3	9	9	9	1.09693	0.0165016	0.0247918	0.00275755	-8.5024	down
pmb2991	C33H40O19	Apigenin-7-O-glucoside-4'-O-rutinoside	Flavonoids	Flavones	579790	557010	544540	225110	218130	238020	1.09524	6.74488e-05	0.000962678	0.405189	-1.30333	down
pmb0721	C39H42O20	Tricin-7-O-(2''-feruloyl)glucoside-5-O-glucoside	Flavonoids	Flavones	32919	88500	26892	9	9	9	1.0933	0.127881	0.147627	0.00018205	-12.4234	down
pme0309	C8H8O5	3-O-Methylgallic Acid	Tannins	Tannin	7655.7	8804.7	14730	86412	82847	88239	1.07854	2.22656e-05	0.00063558	8.25568	3.04539	up
pme2960	C15H12O5	Naringenin chalcone*	Flavonoids	Chalcones	40260	38489	33545	106660	113230	108420	1.09179	1.38277e-05	0.000482432	2.92366	1.54778	up
MWSHY0017	C15H12O5	(±)-Naringenin; 4',5,7-Trihydroxyflavanone*	Flavonoids	Flavones	37525	47330	45604	119870	131060	126540	1.08638	5.16421e-05	0.000897654	2.8934	1.53277	up
pme3475	C15H12O5	Butin*	Flavonoids	Flavanones	38849	28452	35435	170930	108220	114800	1.06402	0.0368697	0.0478392	3.83459	1.93907	up
pme1201	C15H14O5	Phloretin	Flavonoids	Chalcones	9	9	9	43884	2989	4783.1	1.06807	0.326135	0.348321	1913.19	10.9018	up
pme0088	C15H10O6	Luteolin (5,7,3',4'-Tetrahydroxyflavone)	Flavonoids	Flavones	9	9	9	18802	21579	20233	1.09763	0.00157241	0.00484054	2244.96	11.1325	up
mws1034	C16H14O5	Isosakuranetin (5,7-Dihydroxy-4'-methoxyflavanone)	Flavonoids	Flavanones	9	9	9	11007	12927	13533	1.09745	0.00370123	0.00796017	1387.67	10.4384	up
Cmsp008121	C16H14O5	7-O-Methylnaringenin*	Flavonoids	Flavones	3189.6	5696.4	4186.2	21994	23863	21665	1.07589	5.56974e-05	0.000897654	5.16531	2.36886	up
Lmdp003110	C15H12O6	2,6,7,4'-Tetrahydroxyisoflavanone	Flavonoids	Dihydroisoflavones	9	9	9	203880	205730	211010	1.09771	0.000106618	0.00104619	22985.9	14.4885	up
mws0064	C15H12O6	Eriodictyol (5,7,3',4'-Tetrahydroxyflavanone)	Flavonoids	Flavanones	9	9	9	17635	13042	15335	1.09748	0.00739914	0.0129074	1704.15	10.7348	up
mws0054	C15H14O6	Catechin	Flavonoids	Flavanols	9	9	9	23821	22496	28499	1.09745	0.00529214	0.0101947	2770.96	11.4362	up
pmp001204	C17H14O5	Apigenin-7,4'-dimethyl ether	Flavonoids	Flavones	11562	17584	19191	309230	350310	319340	1.0914	0.00114689	0.00381963	20.2512	4.33993	up
Lmjp004941	C16H12O6	Rhamnocitrin (7-Methylkaempferol)*	Flavonoids	Flavonols	73305	92427	93883	965620	876940	889640	1.09489	0.000645604	0.00286847	10.524	3.39562	up
mws0058	C16H12O6	Diosmetin (5,7,3'-Trihydroxy-4'-methoxyflavone)	Flavonoids	Flavones	98802	116920	117550	1168000	1173300	1122600	1.09636	3.97197e-05	0.0007795	10.3936	3.37763	up
pmp000001	C16H12O6	Hispidulin (5,7,4'-Trihydroxy-6-methoxyflavone)*	Flavonoids	Flavones	71252	80973	87235	880340	879050	851040	1.09627	7.63816e-06	0.00039973	10.9013	3.44643	up
MWS20189	C16H12O6	Tectorigenin*	Flavonoids	Isoflavones	64423	81098	84586	892190	881150	804890	1.09471	0.000750583	0.00302158	11.2045	3.486	up
Lmmp005689	C16H12O6	Cajanin	Flavonoids	Isoflavones	6566.8	5619.5	6122.3	59544	64235	62804	1.09657	0.000398766	0.00215884	10.191	3.34922	up
Lmhn004976	C16H12O6	Aracarpene 2*	Flavonoids	Isoflavones	99600	109900	111780	1207600	1144400	1090500	1.09699	0.000931422	0.00344078	10.715	3.42155	up
Lmhn005110	C16H12O6	Aracarpene 1*	Flavonoids	Isoflavones	82569	83002	78774	667080	781870	782950	1.09614	0.00331861	0.00760616	9.13422	3.19128	up
Zmap007870	C16H14O6	Blumeatin*	Flavonoids	Flavanones	9	9	9	100790	83954	96944	1.09765	0.00293025	0.00691804	10432.9	13.3489	up
Cmsp007228	C16H14O6	7-O-Methyleriodictyol*	Flavonoids	Flavanols	9	9	9	104150	84091	94345	1.09766	0.00375907	0.00796946	10466.1	13.3534	up
mws0044	C15H12O7	Dihydroquercetin(Taxifolin)	Flavonoids	Flavanonols	6534	9458.5	7695.6	50528	50373	36927	1.08316	0.0115572	0.0187478	5.81845	2.54063	up
pmp000106	C18H16O5	5,7,4'-Trimethoxyflavone	Flavonoids	Flavones	9	9	9	6478.9	4840.3	8025	1.09648	0.0197875	0.0286326	716.452	9.48473	up
mws0066	C16H12O7	Isorhamnetin	Flavonoids	Flavonols	9	9	9	10572	11461	10125	1.09769	0.00134126	0.00430532	1191.04	10.218	up
Lmmp006082	C17H16O6	Cajanol	Flavonoids	Isoflavones	9	9	9	10561	14506	13267	1.09724	0.00821845	0.014025	1419.78	10.4714	up
pmf0392	C17H16O6	Persicogenin (5,3'-dihydroxy-7,4'-dimethoxyflavanone)	Flavonoids	Flavanones	174600	222410	222430	7964300	8662000	8299000	1.09651	0.000576128	0.00274097	40.2384	5.3305	up
mws0744	C15H12O8	Dihydromyricetin (Ampelopsin)	Flavonoids	Flavanonols	45870	69378	49532	118070	128040	121080	1.04722	0.00538088	0.01024	2.22837	1.15599	up
pmp000107	C18H16O6	Monohydroxy-trimethoxyflavone	Flavonoids	Flavones	9	9	9	8432.5	7537.7	9344.5	1.09747	0.00380706	0.00796946	937.581	9.8728	up
Lmzp004885	C17H14O7	Tricin (5,7,4'-Trihydroxy-3',5'-dimethoxyflavone)	Flavonoids	Flavones	148040	205800	191780	451390	439640	405920	1.06773	0.000466606	0.00240187	2.37702	1.24915	up
Lmjp005016	C17H14O7	Cirsiliol (3',4',5-Trihydroxy-6,7-Dimethoxyflavone)	Flavonoids	Flavanones	4671.1	6009.6	5395.3	12258	12115	12335	1.08118	0.00253516	0.00666565	2.2834	1.19119	up
MWSHY0118	C19H18O6	5,6,7,4'-Tetramethoxyflavone*	Flavonoids	Flavones	40895	44480	46648	246650	240640	235590	1.09646	1.26049e-05	0.000482432	5.47541	2.45297	up
MWSHY0128	C19H18O6	5,7,8,4'-Tetramethoxyflavone*	Flavonoids	Flavones	16014	18932	17636	46020	43575	42351	1.09059	6.41557e-05	0.000959281	2.50934	1.32731	up
Lmsp009872	C19H18O6	3',4',5,7-Tetramethoxyflavone; Luteolin Tetramethyl Ether*	Flavonoids	Flavones	21402	23763	21135	117460	109960	124880	1.09556	0.00147121	0.00466626	5.31373	2.40972	up
Zmhp004065	C18H16O7	7,8-Dihydroxy-5,6,4'-trimethoxyflavone*	Flavonoids	Flavones	16111	19916	15700	45531	47101	45617	1.08542	0.000685145	0.00286847	2.67267	1.41828	up
pmp000786	C18H16O7	Eupatorin; 3',5-Dihydroxy-4',6,7-Trimethoxyflavone*	Flavonoids	Flavones	16111	19916	15700	45531	47101	45617	1.08542	0.000685145	0.00286847	2.67267	1.41828	up
pmp000006	C18H16O7	Eupatilin (5,7-Dihydroxy-3',4',6-Trimethoxyflavone)*	Flavonoids	Flavones	16111	19916	15700	45531	47101	45617	1.08542	0.000685145	0.00286847	2.67267	1.41828	up
mws1002	C17H14O8	Syringetin	Flavonoids	Flavones	9	9	9	1895.5	3483.4	2170.3	1.0953	0.0361275	0.0472668	279.6	8.12722	up
Zmsp007375	C20H20O7	3,5,7,3'4'-Pentamethoxyflavone*	Flavonoids	Flavones	26057	33132	23891	146360	148240	125520	1.08837	0.00156722	0.00484054	5.05681	2.33823	up
MWSHY0027	C20H20O7	Tangeretin (4',5,6,7,8-Pentamethoxyflavone)	Flavonoids	Flavones	161470	181530	175060	352990	357840	359160	1.09259	0.000389837	0.00214752	2.06538	1.04641	up
mws1313	C20H20O7	Sinensetin (5,6,7,3',4'-pentamethoxyflavone)	Flavonoids	Flavones	52980	41039	44403	234250	262890	280700	1.09114	0.00244629	0.00660779	5.61934	2.4904	up
mws0043	C21H22O8	Nobiletin (5,6,7,8,3',4'-Hexamethoxyflavone)	Flavonoids	Flavones	287180	341080	310600	1538600	1513000	1536400	1.09563	6.17813e-06	0.000390363	4.88678	2.28888	up
pma6218	C21H22O9	O-MethylNaringenin-8-C-arabinoside	Flavonoids	Flavones	168460	190440	174180	366050	340240	360470	1.08972	7.93024e-05	0.000979531	2.00113	1.00081	up
Hmhp002834	C20H19O10+	Cyanidin 3-xyloside*	Flavonoids	Anthocyanidins	9	9	9	560390	605700	602790	1.09769	0.000616148	0.00284515	65514.1	15.9995	up
Smlp002532	C20H19O10+	Cyanidin-3-O-arabinoside*	Flavonoids	Anthocyanidins	9	9	9	560390	605700	602790	1.09769	0.000616148	0.00284515	65514.1	15.9995	up
pmp000117	C22H24O9	3,5,6,7,8,3',4'-Heptamethoxyflavone	Flavonoids	Flavonols	74306	109950	99525	410990	414070	410780	1.0842	0.00100358	0.00358096	4.35491	2.12264	up
pme3392	C21H21O10+	Pelargonidin-3-O-glucoside	Flavonoids	Anthocyanidins	9	9	9	1526000	1552800	1574100	1.09771	8.04906e-05	0.000979531	172330	17.3948	up
mws2186	C20H18O11	Avicularin(Quercetin-3-O-α-L-arabinofuranoside)	Flavonoids	Flavonols	16813	17797	24761	84998	75672	69893	1.0773	0.00115562	0.00381963	3.88343	1.95733	up
Lmdp003509	C20H18O11	Quercetin-3-O-xyloside (Reynoutrin)	Flavonoids	Flavonols	18819	18742	23161	99688	97312	85106	1.09104	0.00177224	0.00529983	4.64586	2.21595	up
HJN087	C21H22O10	Naringenin-4'-O-glucoside*	Flavonoids	Flavanones	15228	21237	17918	169640	168910	167380	1.09382	1.8685e-05	0.00058671	9.30309	3.21771	up
Lmlp006175	C21H22O10	Isosalipurposide (Phlorizin Chalcone)*	Flavonoids	Chalcones	13919	22532	18790	157500	194350	180480	1.08781	0.00311571	0.00724691	9.6365	3.26851	up
HJN090	C21H22O10	Butin-7-O-glucoside*	Flavonoids	Flavanones	19728	22799	21423	159900	166840	175830	1.09629	0.000683963	0.00286847	7.8588	2.97431	up
mws1179	C21H22O10	Naringenin-7-O-glucoside (Prunin)*	Flavonoids	Flavanones	3922.9	6043.9	4615.1	38883	38333	35255	1.08949	0.000102874	0.00104201	7.71306	2.9473	up
pmn001697	C21H18O11	Apigenin-7-O-glucuronide	Flavonoids	Flavones	9	9	9	80577	92062	96214	1.09758	0.00271256	0.00673502	9957.52	13.2816	up
Hmcp002316	C21H20O11	Isorhamnetin-3-O-arabinoside	Flavonoids	Flavonols	9	9	9	43591	54029	46805	1.09758	0.0040866	0.00838687	5349.07	12.3851	up
Xmyp005654	C21H20O11	Kaempferol-4'-O-glucoside*	Flavonoids	Flavonols	177340	139360	255240	1894900	2135900	2066700	1.0849	0.000238898	0.00173269	10.6611	3.41428	up
Lmlp003531	C21H20O11	Luteolin-3'-O-glucoside*	Flavonoids	Flavones	9	9	9	1912600	1809900	1830600	1.09773	0.000286869	0.00183831	205670	17.65	up
mws0089	C21H20O11	Kaempferol-7-O-glucoside	Flavonoids	Flavonols	19846	11916	10703	177060	156020	155310	1.08478	0.000658035	0.00286847	11.501	3.52369	up
mws0913	C21H20O11	Kaempferol-3-O-galactoside (Trifolin)	Flavonoids	Flavonols	15247	20052	25623	136570	233410	123100	1.06735	0.0525617	0.0660175	8.09363	3.01679	up
Hmpp003270	C21H20O11	Luteolin-4'-O-glucoside	Flavonoids	Flavones	122210	126570	148260	2170800	2021600	2073900	1.09647	0.000338059	0.00197384	15.7825	3.98026	up
Lmtn002796	C21H22O11	Aromadendrin-7-O-glucoside*	Flavonoids	Flavanonols	9	9	9	2030000	2413400	2132000	1.09767	0.00272483	0.00673502	243533	17.8938	up
pmb3023	C21H22O11	Eriodictyol-8-C-glucoside*	Flavonoids	Flavanones	9	9	9	1007700	964670	1175600	1.09761	0.00373961	0.00796946	116591	16.8311	up
Lmzn001894	C21H18O12	Kaempferol-3-O-glucuronide*	Flavonoids	Flavonols	9	9	9	84095	93220	100350	1.09758	0.00257379	0.00666565	10283.9	13.3281	up
pmn001702	C21H18O12	Tetahydroxyflavone-7-O-glucuronide*	Flavonoids	Flavones	9	9	9	78903	74291	83103	1.09767	0.00104239	0.00361631	8751.74	13.0954	up
pmb3012	C22H22O11	Chrysoeriol-7-O-glucoside	Flavonoids	Flavones	32395	46293	46702	451760	365000	286400	1.08383	0.0199713	0.0287659	8.79783	3.13715	up
Lmjp003655	C22H22O11	6-C-MethylKaempferol-3-glucoside	Flavonoids	Flavones	641920	694740	801480	14959000	17997000	17054000	1.09585	0.00308293	0.00722418	23.3895	4.54779	up
Hmmp004965	C22H22O11	Diosmetin-7-O-glucoside*	Flavonoids	Flavones	533560	723400	723190	15837000	15725000	16202000	1.0954	6.21598e-06	0.000390363	24.1214	4.59224	up
Zmgp004060	C22H22O11	paratensein-7-O-glucoside	Flavonoids	Flavones	495820	731290	775680	16610000	14736000	16296000	1.09306	0.00117287	0.00383627	23.7878	4.57215	up
pmp000579	C22H22O11	Diosmetin-7-O-galactoside*	Flavonoids	Flavones	593650	693240	699500	16715000	15832000	16907000	1.09697	0.00038529	0.00214752	24.8964	4.63787	up
Hmgp002189	C22H22O11	Hispidulin-7-O-Glucoside	Flavonoids	Flavones	479130	640570	769920	14903000	15822000	15807000	1.09335	0.00017153	0.00141738	24.6251	4.62206	up
mws0061	C21H20O12	Quercetin-3-O-galactoside (Hyperin)	Flavonoids	Flavonols	170080	60501	67553	1919900	1574000	2098800	1.07145	0.005491	0.0103244	18.759	4.22951	up
Smgp004575	C21H20O12	Quercetin-5-O-β-D-glucoside	Flavonoids	Flavonols	354870	139060	124420	2937300	2991800	2928400	1.06796	0.000349882	0.00199751	14.3244	3.8404	up
Zmhp004034	C21H20O12	Rhodiolgin	Flavonoids	Flavonols	9	9	9	993360	706470	426660	1.09695	0.0493584	0.0622431	78758.9	16.2652	up
pmp001309	C21H20O12	6-Hydroxykaempferol-7-O-glucoside	Flavonoids	Flavonols	83566	99880	107240	806810	863950	1237000	1.08734	0.0228346	0.0320093	10.0031	3.32237	up
Hmcn001884	C21H20O12	6-Hydroxyluteolin 5-glucoside	Flavonoids	Flavones	153350	52911	47504	902510	856460	942090	1.05226	8.68755e-05	0.000979531	10.6439	3.41196	up
mws0856	C21H20O12	Spiraeoside*	Flavonoids	Flavonols	150480	48671	50977	875500	927670	913490	1.05401	0.00029505	0.00185291	10.8611	3.4411	up
MWSHY0046	C21H20O12	Quercetin-3-O-glucoside (Isoquercitrin)	Flavonoids	Flavonols	396150	107660	135890	2985100	2597000	3015500	1.05379	0.00019109	0.00146347	13.4401	3.74847	up
mws1329	C21H20O12	Quercetin-7-O-glucoside*	Flavonoids	Flavonols	161490	28428	36924	1050600	1179800	1202700	1.03339	8.01162e-05	0.000979531	15.1343	3.91975	up
Lmzp002365	C22H24O11	Hesperetin-7-O-glucoside	Flavonoids	Flavones	112680	15937	47279	536110	628710	574490	1.00396	0.000188305	0.00146347	9.88829	3.30572	up
pme1598	C22H24O11	Hesperetin-5-O-glucoside	Flavonoids	Flavanonols	205520	66356	73486	1154700	1024600	1097300	1.05063	9.64979e-05	0.00101001	9.48744	3.24602	up
Zmbp003860	C23H23O11+	Pelargonidin-3-O-(6''-O-acetyl)glucoside	Flavonoids	Anthocyanidins	9	9	9	8218100	8250300	8050900	1.09773	5.71754e-05	0.000897654	908122	19.7925	up
pmp000583	C22H20O12	Diosmetin-7-O-glucuronide	Flavonoids	Flavones	25861	26392	24023	9292000	9716900	8791900	1.0977	0.000835593	0.00323921	364.476	8.50968	up
Lmmp003783	C21H18O13	Quercetin-3-O-glucuronide	Flavonoids	Flavonols	9	9	9	149500	173290	159580	1.09766	0.00183358	0.00543155	17865.6	14.1249	up
Hmcp002207	C22H22O12	Isorhamnetin-7-O-glucoside (Brassicin)*	Flavonoids	Flavonols	57067	57043	63737	1903200	2086700	1896100	1.09723	0.00105956	0.00361631	33.0959	5.04858	up
pma0214	C22H22O12	6-C-Methylquercetin-3-O-glucoside*	Flavonoids	Flavonols	32210	73332	59700	451070	592620	1027300	1.05748	0.0663924	0.0824001	12.5331	3.64767	up
Lmjp002906	C22H22O12	Rhamnetin-3-O-Glucoside*	Flavonoids	Flavonols	67486	68161	90635	1928300	2003200	1963100	1.09553	2.44982e-05	0.000636646	26.0498	4.7032	up
Lmjp003295	C22H22O12	6-Methoxykaempferol-3-O-glucoside*	Flavonoids	Flavonols	61135	87849	77773	795320	432890	378530	1.06291	0.0717155	0.0879635	7.08573	2.82492	up
Hmgp002036	C22H22O12	Nepetin-7-O-glucoside(Nepitrin)	Flavonoids	Flavones	57067	57043	63737	1903200	2086700	1896100	1.09723	0.00105956	0.00361631	33.0959	5.04858	up
Lmmn003398	C23H22O12	Kaempferol-3-O-(6''-acetyl)glucoside	Flavonoids	Flavonols	9	9	9	226920	244860	168620	1.09756	0.0114249	0.0186845	23718.5	14.5337	up
Lmpp003059	C23H23O12+	Cyanidin-3-O-(6''-O-acetyl)glucoside	Flavonoids	Anthocyanidins	9	9	9	88665000	76975000	90662000	1.09769	0.00248707	0.00661814	9.49267e+06	23.1784	up
Lmgp003546	C23H24O12	4',5'-Dihydroxy-6,8-dimethoxyisoflavone-7-O-galactoside*	Flavonoids	Isoflavones	183490	262050	243450	477030	474920	500320	1.05386	0.00451757	0.00909306	2.10782	1.07575	up
Hmgp002238	C23H24O12	Jaceosidin-7-O-Glucoside	Flavonoids	Flavones	251250	261770	152340	485000	531480	487830	1.01414	0.00715754	0.0127211	2.2609	1.17689	up
pmn001642	C23H20O13	Kaempferol-3-O-(2''-O-acetyl)glucuronide	Flavonoids	Flavonols	191560	187700	146070	359620	365290	350560	1.0677	0.00365187	0.00790818	2.04723	1.03367	up
Lmxp003068	C23H21O13+	Cyanidin-3-O-(6''-O-malonyl)arabinoside	Flavonoids	Anthocyanidins	9	9	9	327290	344780	342470	1.0977	0.000263037	0.00177286	37575.6	15.1975	up
Smpp002603	C24H25O12+	Peonidin-3-O-(6''-O-Acetyl)glucoside	Flavonoids	Anthocyanidins	9	9	9	51130000	67319000	75651000	1.09751	0.0121542	0.0194715	7.18889e+06	22.7773	up
Zmsp004363	C23H22O13	Quercetin-3-O-(6''-O-acetyl)glucoside	Flavonoids	Flavonols	9	9	9	2483300	2638200	2602200	1.0977	0.000330296	0.00197384	286063	18.126	up
pmb3045	C23H22O13	Tricin-7-O-Glucuronide*	Flavonoids	Flavones	9	9	9	234380	247000	284250	1.09758	0.00342332	0.00764716	28356.7	14.7914	up
Hmln002199	C23H22O13	Quercetin-3-O-(6''-O-acetyl)galactoside*	Flavonoids	Flavonols	9	9	9	969640	1365900	817310	1.09742	0.0233587	0.0325983	116772	16.8333	up
pmb0554	C24H23O13+	Pelargonidin-3-O-(6''-O-malonyl)glucoside	Flavonoids	Anthocyanidins	564.87	9	9	4341800	3936500	4250300	1.0685	0.000862541	0.0033029	21494.7	14.3917	up
pmn001644	C23H20O14	Quercetin-3-O-(2''-O-acetyl)glucuronide	Flavonoids	Flavonols	9	9	9	770830	861760	543040	1.09751	0.0166597	0.0247921	80578.9	16.2981	up
pma0791	C24H24O13	Naringenin-7-O-(6''-malonyl)glucoside	Flavonoids	Flavanols	31154	38094	36821	72871	78492	65476	1.07094	0.00276693	0.00673502	2.04432	1.03162	up
Li512111	C24H24O13	Isorhamnetin-3-O-(6''-acetylglucoside)	Flavonoids	Flavonols	4898.2	5860.5	7071.5	1689200	1886800	1773700	1.09676	0.00103441	0.00361631	300.036	8.22899	up
pmp000235	C27H26O11	Salcolin B*	Flavonoids	Flavones	168280	252270	194690	451040	426150	416110	1.0466	0.00532666	0.0101986	2.10211	1.07184	up
Lmmp003817	C24H22O14	Kaempferol-3-O-(6''-malonyl)glucoside*	Flavonoids	Flavonols	47332	67464	42004	4604700	3265500	5091100	1.09354	0.0159488	0.0241929	82.6614	6.36914	up
Lmdp004892	C24H22O14	Kaempferol-3-O-(6''-malonyl)galactoside*	Flavonoids	Flavonols	44204	70819	46398	3519500	4052500	4202100	1.09478	0.00281267	0.00679369	72.9403	6.18864	up
pmb0542	C24H23O14+	Cyanidin-3-O-(6''-O-malonyl)glucoside	Flavonoids	Anthocyanidins	9	9	9	169940000	172970000	169780000	1.09772	3.68679e-05	0.000771768	1.89885e+07	24.1786	up
pmp000588	C25H24O14	Diosmetin-7-O-(6''-malonyl)glucoside	Flavonoids	Flavones	7466.7	10767	8074.5	143610	155590	150780	1.09437	0.000242797	0.00173269	17.1042	4.09628	up
pmb0608	C25H24O14	Chrysoeriol-7-O-(6''-malonyl)glucoside	Flavonoids	Flavones	87007	98039	109520	1399500	1813900	1796200	1.09411	0.00722244	0.0127407	17.0067	4.08803	up
pmp000589	C24H22O15	Quercetin-7-O-(6''-malonyl)glucoside*	Flavonoids	Flavonols	9	9	9	3833400	3417900	3664100	1.09772	0.00109734	0.003705	404274	18.625	up
Hmln002189	C24H22O15	Quercetin-3-O-(6''-malonyl)galactoside*	Flavonoids	Flavonols	9	9	9	3495100	3800100	3844500	1.09768	0.000873512	0.00330461	412581	18.6543	up
HJAP064	C25H24O15	Isorhamnetin-3-O-(6''-malonyl)glucoside*	Flavonoids	Flavonols	17454	18807	19765	5149900	5472200	5228200	1.09757	0.00033945	0.00197384	282.91	8.1442	up
Zmhp005139	C25H24O15	Tamarixetin-3-O-(6''-malonyl)glucoside*	Flavonoids	Flavonols	32587	34626	33268	5457100	5652100	6386800	1.0974	0.00237433	0.00648295	174.122	7.44396	up
Lmtp004126	C24H22O16	Myricetin-3-O-(6''-malony)glucoside	Flavonoids	Flavonols	9	9	9	821250	765940	942230	1.09761	0.00379007	0.00796946	93682.2	16.5155	up
Zmxp005470	C26H26O15	Tricin-7-O-(6''-O-malonyl)glucoside	Flavonoids	Flavones	499710	777060	764810	2016200	2367100	2106000	1.06223	0.000488754	0.0024753	3.17857	1.66838	up
mws0836	C30H26O12	Procyanidin B1*	Tannins	Proanthocyanidins	9	9	9	5688.6	7527.1	7796.3	1.09706	0.00884523	0.0149323	778.222	9.60404	up
Smsp002643	C27H31O14+	Pelargonidin-3-O-rutinoside	Flavonoids	Anthocyanidins	18968	28753	11229	2309100	2316100	2221300	1.09128	0.000125137	0.00113653	116.141	6.85973	up
Lmjp001877	C26H29O15+	Cyanidin-3-O-sambubioside [Cyanidin-3-O-(2''-O-xylosyl)glucoside]	Flavonoids	Anthocyanidins	9	9	9	265490	350480	122750	1.09593	0.0657135	0.081881	27360	14.7398	up
Lmfn004769	C27H22O15	Quercetin-3-O-(4''-O-galloyl)arabinoside	Flavonoids	Flavonols	3804.9	5653.9	4892.6	15864	18154	15289	1.07582	0.000908005	0.00339421	3.43569	1.7806	up
MWSslk094	C30H26O13	Proanthocyanidins	Tannins	Proanthocyanidins	13779	16841	20826	614470	636590	641910	1.09508	8.56285e-05	0.000979531	36.7953	5.20145	up
Hmcp001829	C27H30O15	Quercetin-3,7-Di-O-rhamnoside	Flavonoids	Flavonols	9	9	9	184680	166320	209270	1.09757	0.00440951	0.00898811	20750.7	14.3409	up
pme1793	C27H31O15+	Pelargonidin-3,5-O-diglucoside	Flavonoids	Anthocyanidins	9	9	9	13088	21719	12036	1.09644	0.0365322	0.047598	1734.93	10.7607	up
pme1773	C27H31O15+	Cyanidin-3-O-rutinoside (Keracyanin)	Flavonoids	Anthocyanidins	236600	63308	53633	136220000	136170000	133190000	1.0889	5.19876e-05	0.000897654	1147.19	10.1639	up
pmb0562	C27H25O16+	Pelargonidin-3-O-(3'',6''-O-dimalonylglucoside)	Flavonoids	Anthocyanidins	9	9	9	4655600	4455200	4677900	1.09772	0.000237263	0.00173269	510693	18.9621	up
pmb3002	C28H32O15	Chrysoeriol-7-O-rutinoside	Flavonoids	Flavones	2717300	2939700	2856000	9799000	10391000	10026000	1.09657	0.000127064	0.00113653	3.5494	1.82757	up
pmp001080	C28H32O15	Diosmetin-7-O-Neohesperidoside (Neodiosmin)*	Flavonoids	Flavones	496150	620610	626300	1879600	2126800	2376900	1.08364	0.00521615	0.0101103	3.66212	1.87268	up
mws1661	C28H32O15	Diosmetin-7-O-rutinoside (Diosmin)*	Flavonoids	Flavones	6953100	8738900	8343400	22456000	23656000	25950000	1.08534	0.000772545	0.00307062	2.99816	1.58408	up
Hmgp002121	C31H28O13	Hispidulin-7-O-(6''-O-p-Coumaroyl)Glucoside	Flavonoids	Flavones	3632100	4811500	5325500	13110000	15354000	14514000	1.07254	0.000423394	0.00225332	3.12134	1.64216	up
Lmpp003977	C31H29O13+	Peonidin-3-O-(6''-O-p-Coumaroyl)glucoside	Flavonoids	Anthocyanidins	4663600	5757900	5600200	16673000	14899000	15613000	1.08781	0.000189086	0.00146347	2.94507	1.5583	up
Lmtp003079	C28H33O15+	Peonidin-3-O-rutinoside	Flavonoids	Anthocyanidins	9	9	9	67596000	64641000	68675000	1.09771	0.000323997	0.00197384	7.44119e+06	22.8271	up
pmb0665	C27H30O16	Luteolin-8-C-glucoside-7-O-glucoside	Flavonoids	Flavonoid carbonoside	9	9	9	291550	303350	254220	1.09772	0.00272581	0.00673502	31448.9	14.9407	up
Lmbp002592	C27H30O16	Kaempferol-3,7-di-O-glucoside*	Flavonoids	Flavones	9	9	9	93044	70192	73285	1.09761	0.00814374	0.0139734	8760.04	13.0967	up
Lmjp002461	C27H30O16	Quercetin-3-O-neohesperidoside*	Flavonoids	Flavonols	1008900	485450	499750	10035000	10387000	10361000	1.0821	5.8056e-06	0.000390363	15.437	3.94832	up
pmb0711	C27H30O16	Quercetin-7-O-rutinoside*	Flavonoids	Flavonols	898800	568990	432560	10787000	10190000	9961900	1.08583	3.67596e-05	0.000771768	16.2806	4.02508	up
Lmbp002336	C27H30O16	Quercetin-3-O-(2''-O-rhamnosyl)galactoside	Flavonoids	Flavonols	1008900	485450	499750	10035000	10387000	10361000	1.0821	5.8056e-06	0.000390363	15.437	3.94832	up
MWSHY0067	C27H30O16	Quercetin-3-O-rutinoside (Rutin)	Flavonoids	Flavonols	892830	516440	374940	9792800	9479800	8448800	1.08036	0.000697816	0.00288308	15.5371	3.95764	up
Lmsp004166	C27H30O16	Quercetin-3-O-glucoside-7-O-rhamnoside*	Flavonoids	Flavonols	909320	513810	456920	10397000	10825000	9994000	1.08593	2.63579e-05	0.000636646	16.6038	4.05344	up
pmn001583	C27H30O16	Quercetin-3-O-robinobioside	Flavonoids	Flavonols	375630	202650	237380	6761400	6163300	5141700	1.08902	0.00618192	0.0115326	22.1494	4.4692	up
Hmpp002612	C27H30O16	Luteolin-7-O-gentiobioside*	Flavonoids	Flavones	9	9	9	68218	92935	73285	1.09747	0.0091783	0.0153297	8682.89	13.084	up
pme1777	C27H31O16+	Cyanidin-3,5-O-diglucoside (Cyanin)	Flavonoids	Anthocyanidins	9	9	9	513890	555110	540250	1.0977	0.000504476	0.00251437	59601.9	15.8631	up
pmb0557	C27H25O17+	Cyanidin-3-O-(3'',6''-O-dimalonyl)glucoside	Flavonoids	Anthocyanidins	23817	7086.7	4332	11201000	10894000	10794000	1.08705	0.000120646	0.00113653	933.4	9.86635	up
Lmcp003751	C28H31O16+	"Cyanidin-3-O-(6""-O-acetyl-2""-O-xylosyl)glucoside"	Flavonoids	Anthocyanidins	9	9	9	4082800	4266000	3498800	1.09772	0.00341355	0.00764716	438800	18.7432	up
HJN051	C28H32O16	Tamarixetin-3-O-rutinoside	Flavonoids	Flavonols	212170	226990	197260	2379600	2647400	2101000	1.09579	0.00516576	0.0101075	11.2002	3.48545	up
Lmnp002584	C28H32O16	Hispidulin-8-C-(2''-O-glucosyl)glucoside	Flavonoids	Flavonoid carbonoside	12387	17174	34874	194100	202070	175890	1.05888	9.04663e-05	0.000979531	8.87809	3.15025	up
Zmxp004480	C28H32O16	Chrysoeriol-7-O-gentiobioside	Flavonoids	Flavones	36803	26925	52807	249630	299630	264750	1.07469	0.000829385	0.00323921	6.98511	2.80428	up
pmf0614	C28H33O16+	Peonidin-3,5-O-diglucoside	Flavonoids	Anthocyanidins	9	9	9	131910	121540	131800	1.0977	0.000716282	0.00292094	14268.5	13.8005	up
pmp001311	C27H30O17	6-Hydroxykaempferol-7,6'-O-Diglucoside	Flavonoids	Flavonols	9	9	9	17992	33741	23232	1.09646	0.0326861	0.0438608	2776.48	11.439	up
Lmsp003729	C27H30O17	Myricetin-3-O-rutinoside*	Flavonoids	Flavonols	9	9	9	543370	439780	456760	1.0977	0.00443681	0.00898811	53330	15.7027	up
Zmdp003457	C27H30O17	Myricetin-3-O-galactoside-3'-O-rhamnoside*	Flavonoids	Flavonols	9	9	9	538910	480750	448600	1.09773	0.00290331	0.00691804	54380	15.7308	up
Lmmp003487	C27H26O18	Luteolin-7-O-glucuronide-(2→1)-glucuronide	Flavonoids	Flavones	9	9	9	234260	270320	263830	1.09764	0.00187209	0.00545165	28459.6	14.7966	up
Lmgp004959	C29H34O16	Tricin-7-O-neohesperidoside	Flavonoids	Flavones	2102800	3231800	3036900	5755300	5739600	5283200	1.02467	0.00686723	0.0123926	2.00419	1.00302	up
Hmgp002080	C28H32O17	Patuletin-7-O-rutinoside	Flavonoids	Flavonols	7115.4	6255	10298	126870	124580	85482	1.08599	0.0155216	0.0237746	14.2355	3.83142	up
Hmgp001888	C28H32O17	Patuletin-3-O-rutinoside	Flavonoids	Flavonols	7115.4	6255	10298	126870	124580	85482	1.08599	0.0155216	0.0237746	14.2355	3.83142	up
pmb3014	C31H30O15	Luteolin-7-O-(6''-eudesmyl)glucoside	Flavonoids	Flavones	9	9	9	209290	205900	222590	1.09768	0.000573523	0.00274097	23621.5	14.5278	up
pmp001289	C28H28O18	Chrysoeriol-7-O-(2''-O-glucuronyl)glucuronide	Flavonoids	Flavones	9	9	9	1898100	1819100	2150700	1.09764	0.00260374	0.00666565	217330	17.7295	up
Zmbp002578	C29H33O17+	Cyanidin-3-O-(6''-O-acetyl)glucoside-5-O-glucoside	Flavonoids	Anthocyanidins	9	9	9	451340	446050	511600	1.09764	0.00199786	0.00575531	52184.8	15.6713	up
Hmqp003184	C29H30O18	Luteolin-7-O-(6''-malonyl)glucoside-5-O-arabinoside	Flavonoids	Flavones	6560.4	13075	11859	59820	71911	55143	1.06444	0.00405595	0.00837874	5.93356	2.5689	up
pmb0738	C34H34O16	Tricin-7-O-(2''-Sinapoyl)glucoside	Flavonoids	Flavones	13669	21153	17171	54271	57199	53819	1.07287	0.000668244	0.00286847	3.17906	1.6686	up
Lmzn001875	C33H42O19	Naringenin-7-O-Rutinoside-4'-O-glucoside	Flavonoids	Flavones	9555.3	12122	8510.4	22313	23480	17528	1.03162	0.0112241	0.0184522	2.09758	1.06872	up
Smsp001702	C33H41O20+	Cyanidin-3-O-rutinoside-5-O-glucoside	Flavonoids	Anthocyanidins	9	9	9	25317	28189	27082	1.09766	0.000968461	0.00349537	2984.74	11.5434	up
Lmtp001633	C34H43O20+	Peonidin-3-O-rutinoside-5-O-glucoside	Flavonoids	Anthocyanidins	9	9	9	134160	164010	156670	1.09758	0.00349038	0.00764716	16845.9	14.0401	up
pmb1108	C33H40O21	Luteolin-6,8-di-C-glucoside-7-O-glucoside	Flavonoids	Flavonoid carbonoside	9	9	9	6683.1	9582	5352.4	1.09645	0.0288074	0.0391581	800.648	9.64502	up
pmb0676	C38H40O19	Chrysoeriol-8-C-glucoside-7-O-(6''-feruloyl)glucoside	Flavonoids	Flavonoid carbonoside	72655	72557	68426	151990	192440	156160	1.08011	0.0166516	0.0247921	2.34317	1.22846	up

## Sheet: Table S2
Supplementary Table 2: The differentially expressed MYB, bHLH and WD40 genes identified in Shiluan02-1 and Hengzi151.
id	Shiluan02-1-1	Shiluan02-1-2	Shiluan02-1-3	Hengzi151-1	Hengzi151-2	Hengzi151-3	TF	type
LOC123059745	0.100465	0.317924	0.204684	2.73396	2.43696	2.61339	bHLH	TF
LOC123112283	0.0339091	0.0393456	0.062177	0.252383	0.157651	0.154573	bHLH	TF
LOC123190100	0	0.0158128	0.0152708	321.822	326.325	320.043	bHLH	TF
LOC123072107	1.56264	1.11263	0.696432	0.145383	0.177679	0.17421	bHLH	TF
LOC123073527	2.25442	2.73477	2.78457	0	0	0	bHLH	TF
LOC123073529	0.314931	1.44961	0.991614	0	0.0578731	0	bHLH	TF
LOC123110986	9.4093	9.65043	8.98431	1.82483	1.91309	1.73982	bHLH	TF
LOC123161020	4.4923	5.31701	4.6303	0	0	0	bHLH	TF
LOC123046701	0.165802	0.0874477	0.405362	2.79205	3.3683	2.9575	MYB	TF
LOC123054556	0.263611	0.370758	0.375953	2.58335	2.57552	1.79379	MYB	TF
LOC123064990	0	0	0	2.30129	2.86059	1.95625	MYB	TF
LOC123073744	0	0	0	1.86709	1.93018	1.28305	MYB	TF
LOC123180688	0	0	0	1.27425	1.40698	0.645255	MYB	TF
LOC123190414	0.523839	0.533514	0.680836	6.3525	5.42226	5.76391	MYB	TF
LOC123088485	0.434659	0.316205	0.585286	0.0790189	0.136338	0.0247548	MYB	TF
LOC123174675	2.1257	2.24228	1.81896	0.284785	0.429691	0.286485	MYB	TF
LOC123156654	0.0392168	0.248205	0.292964	11.6329	11.1841	10.4476	WD40	TF
LOC123097277	0.679694	0.659612	0.581612	5.42567	5.79802	5.75217	WD40	TF
LOC123156362	0	0	0	4.76625	7.48602	5.1379	WD40	TF
LOC123096237	0	0	0	3.47944	4.326	4.05256	WD40	TF
LOC123149913	0	0	0	1.73655	1.91984	1.79739	WD40	TF
LOC123111305	7.73171	6.83599	6.57304	1.4779	1.37819	1.5881	WD40	TF
LOC123114245	5.49238	5.1089	4.35734	1.23877	1.02613	1.45141	WD40	TF
LOC123155841	9.94037	10.3212	10.7451	1.04368	1.71645	1.46678	WD40	TF
LOC123061622	6.71735	7.48604	7.5482	0.755649	0.679598	0.488202	WD40	TF
LOC123139623	4.99303	4.47579	5.40801	0.697719	0.738023	0.586714	WD40	TF
LOC123092024	5.12239	4.96136	4.72246	0.60357	0.519088	0.776824	WD40	TF
LOC123156333	0.0915293	0.143266	0.102263	0.532909	0.537149	0.579328	WD40	TF
LOC123098481	1.97527	1.93207	1.65853	0.412096	0.205692	0.237265	WD40	TF
LOC123145020	0.0225121	0.0237467	0.0131045	0.341096	0.494067	0.30595	WD40	TF
LOC123105799	1.71451	1.9113	1.23053	0.108758	0.157533	0.0193072	WD40	TF
LOC123112472	3.23373	3.27279	2.52627	0.0203281	0.0220834	0.0216523	WD40	TF
LOC123182272	1.7595	1.57214	1.25115	0	0	0	WD40	TF
LOC123139391	1.5211	2.47971	2.67645	0	0	0	WD40	TF
LOC123149732	1.00332	0.72277	0.897424	0	0	0	WD40	TF
LOC123156652	1.08831	1.148	1.12728	0	0	0	WD40	TF
LOC123156650	4.06006	5.13071	4.2931	0	0	0	WD40	TF

## Sheet: Table S3
Supplementary table 3: The differentially expressed transcription factors identified in Shiluan02-1 and Hengzi151.
ID	Shiluan02-1-1	Shiluan02-1-2	Shiluan02-1-3	Hengzi151-1	Hengzi151-2	Hengzi151-3	TFs	Type
LOC100125707	0.412506	0.253825	0.280143	1.69503	0.903329	1.43073	AP2/ERF	TF
LOC123112960	0.0249722	0.0197563	0.0826763	0.726039	0.99696	0.692908	AP2/ERF	TF
LOC123154669	0	0	0	10.5586	11.0347	9.46689	AP2/ERF	TF
LOC123042630	16.7686	17.0955	16.841	0.963019	1.25541	0.52753	AP2/ERF	TF
LOC123108302	0.678552	0.946658	0.825019	0	0	0	AP2/ERF	TF
LOC123138224	6.84553	7.68285	6.64634	0	0.0442567	0.0144642	AP2/ERF	TF
LOC123185880	1.79875	1.18009	1.63125	0	0	0.152166	AP2/ERF	TF
LOC123054617	1.61149	1.69987	1.728	20.8517	22.6309	24.7315	B3	TF
LOC123096155	0.576209	0.371439	0.456538	1.92097	2.0545	2.06197	B3	TF
LOC123117617	0	0	0	1.58275	0.899393	1.40056	B3	TF
LOC123132397	0.0476671	0.0419011	0.0566509	0.310434	0.200739	0.267675	B3	TF
LOC123080781	1.1293	1.3997	1.75436	0.315198	0.0285347	0	B3	TF
LOC123105379	5.86956	5.25901	5.58303	0.0438621	0.119124	0.0467194	B3	TF
LOC123111511	0.461986	0.777081	0.67413	0.0348499	0.113578	0.0989869	BES1	TF
LOC123127245	0.27519	0.203198	0	1.45935	1.19598	1.49988	bZIP	TF
LOC123043995	11.7527	12.4289	10.2009	2.59411	2.74236	3.10477	bZIP	TF
LOC123190476	22.9692	22.642	24.4824	4.33539	5.19187	6.21768	bZIP	TF
LOC123055437	0.758156	1.14745	0.889852	4.64619	4.76421	4.11588	C2C2	TF
LOC123079039	0.339208	0.198784	0.115182	0.99936	1.23803	0.653616	C2C2	TF
LOC123128245	0.873413	0.69689	0.787073	4.92764	4.57225	4.37202	C2C2	TF
LOC123138077	1.43016	1.23101	1.52682	6.00354	6.07098	6.17921	C2C2	TF
LOC123145345	1.36998	1.68809	1.48203	7.7377	8.14855	7.3527	C2C2	TF
LOC123084774	1.30033	1.26613	1.32463	0.07755	0.370685	0.280846	C2C2	TF
LOC123111814	1.76617	1.56041	1.87224	0	0	0	C2C2	TF
LOC123157386	0	0	0	1.11844	1.5243	1.79778	C2H2	TF
LOC123159444	0	0	0	0.505125	0.83409	0.731721	C2H2	TF
LOC123162023	0	0	0	2.21156	1.9148	2.03682	C2H2	TF
LOC123184132	0.387434	0.429116	0.611745	2.34296	2.72149	2.55317	C2H2	TF
LOC123103591	3.0776	3.00591	2.51583	0.954431	0.288013	0.357694	C2H2	TF
LOC123043256	0.432219	0.383389	0.450302	3.49114	3.09763	3.76724	C3H	TF
LOC123136750	1.25261	1.46039	0.772324	0	0	0	C3H	TF
LOC123161325	2.54092	2.85181	3.10609	0.113471	0	0.0604315	CPP	TF
LOC123176402	0.925307	0.790138	0.852827	0	0	0	CPP	TF
LOC123184807	2.36615	1.88612	2.41037	0	0	0	CPP	TF
LOC123052758	0.0427845	0.135393	0.058112	1.07474	0.980162	1.10235	FAR1	TF
LOC123057809	0	0	0	6.14588	6.17173	6.41491	FAR1	TF
LOC123067920	0.0260163	0.0182954	0.0176683	1.41194	1.61274	1.28907	FAR1	TF
LOC123068911	0	0	0	7.36785	7.89195	7.21356	FAR1	TF
LOC123069326	0	0	0	2.95778	2.78416	2.5866	FAR1	TF
LOC123110286	0	0	0	3.67731	4.48134	3.57746	FAR1	TF
LOC123156742	0.0424273	0.014918	0.0576268	1.40786	1.31503	1.92002	FAR1	TF
LOC123187469	0	0	0	3.15492	3.30289	3.77345	FAR1	TF
LOC123040174	1.57222	1.1468	0.630418	0	0	0	FAR1	TF
LOC123040487	1.1779	1.00272	1.19991	0.153807	0.271519	0.184305	FAR1	TF
LOC123071723	3.24308	3.84723	3.44778	0.20679	0.224647	0.0800948	FAR1	TF
LOC123085738	1.10123	1.22408	0.856435	0	0	0	FAR1	TF
LOC123104019	1.37694	1.07088	0.950964	0.0325692	0.235878	0.115636	FAR1	TF
LOC123104915	0.88272	0.998441	0.996721	0	0	0	FAR1	TF
LOC123149268	0.6807	0.638251	0.462281	0	0	0	FAR1	TF
LOC123157156	4.27183	4.93333	4.99017	0.00897147	0.0292385	0.0860031	FAR1	TF
LOC123168774	1.50027	1.95761	1.69616	0.0161364	0.0262947	0.0343751	FAR1	TF
LOC123170664	0.954142	1.37113	1.07058	0.0385956	0.0559046	0.0685165	FAR1	TF
LOC123184720	6.60721	6.47051	7.86077	0	0	0	FAR1	TF
LOC123184722	5.95465	5.2659	7.0963	0	0	0	FAR1	TF
LOC123187472	3.52193	3.81747	4.59062	0	0	0	FAR1	TF
LOC123187923	2.70519	2.73189	2.5528	0	0	0	FAR1	TF
LOC123187972	2.39522	2.56922	2.60471	0.00940265	0	0.0200303	FAR1	TF
LOC123058025	0.170255	0.244898	0.283805	1.16639	1.06375	1.44177	GARP	TF
LOC123063675	0.204227	0.129256	0.208043	2.67908	2.41503	2.75241	GARP	TF
LOC123072822	0.310229	0.163621	0.0902932	1.71114	1.79171	1.27363	GARP	TF
LOC123080986	0.0394451	0.187238	0	2.01841	1.19602	1.83718	GARP	TF
LOC123136621	0.0331245	0.157235	0.185589	1.32517	0.770017	1.01759	GARP	TF
LOC123148560	0.00828336	0.00873764	0	0.793774	0.845575	0.8619	GARP	TF
LOC123106077	0.153816	0.249618	0.204903	0.726533	1.36329	1.24287	GRAS	TF
LOC123112854	0	0	0.00671151	0.392295	0.312969	0.404792	GRAS	TF
LOC123046275	0.328669	0.316977	0.373075	0.0349465	0.0569463	0.148892	HB	TF
LOC123102758	17.3567	16.6461	17.1657	0.307755	0.550662	0.231391	HB	TF
LOC123114519	10.534	12.9323	10.6702	0.664438	1.56393	0.766698	HB	TF
LOC123161615	3.63735	4.79145	4.52971	0.0161917	0	0.0431161	HB	TF
LOC123104996	0.24875	0.171564	0.165684	1.49538	1.53749	1.17564	HSF	TF
LOC123122798	0.313948	0.130459	0.164753	1.56665	1.36539	1.565	HSF	TF
LOC123066715	0.103852	0.0657287	0.105793	0.599047	0.776734	0.720403	LOB	TF
LOC123063125	0.512168	0.288137	0.417391	3.08138	3.451	2.53772	MADS	TF
LOC123092968	3.68194	5.66397	3.04748	26.2982	25.0416	25.0848	MADS	TF
LOC123138303	0.394706	0.364309	0.0753904	28.6432	27.0276	31.6092	MADS	TF
LOC123145554	23.9291	22.6392	23.0695	1.7902	2.36865	2.10239	MADS	TF
LOC123155767	2.57452	2.65028	2.30666	0.548309	0.595657	0.491813	MADS	TF
LOC123169618	6.17606	7.8013	8.24765	0.0482856	0.10491	0	MADS	TF
LOC123042950	0.0135036	0	0	1.31914	1.39211	1.4586	NAC	TF
LOC123042951	0	0	0	1.06554	0.815979	1.13495	NAC	TF
LOC123159027	1.12632	1.35782	1.52982	12.3501	12.6576	12.1182	NAC	TF
LOC123191207	0.208195	0.159718	0.308488	0.933267	1.45383	0.919039	NAC	TF
LOC123043337	2.15253	2.64572	2.19276	0	0	0	NAC	TF
LOC123068669	3.3729	3.16652	3.98569	0.376564	0.357946	0.233972	NAC	TF
LOC123134946	5.03202	5.16785	5.02455	0.787994	0.788899	0.806412	NAC	TF
LOC123189700	0.35101	0.12342	0.405245	1.50221	0.993348	1.43774	NF-Y	TF
LOC123112815	0.141736	0.0934435	0.19853	0.807683	0.590921	0.509156	SRS	TF
LOC123167974	0.191768	0.168571	0.0651171	0.490638	0.694523	0.617618	SRS	TF
LOC123183069	7.29444	6.87663	7.33404	0.147212	0.0639698	0.156802	Trihelix	TF
LOC123158136	0.211743	0.111678	0.12942	0.768295	0.727634	0.629495	WRKY	TF
LOC100049024	6.25799	5.43746	5.11545	0.601688	0.346047	0.320442	WRKY	TF

## Sheet: Table S4
Table S4. Sequences of specific primers for qRT-PCR.
Primer name	Forward (5'-3')	Reverse (5'-3')
PAL (LOC123105206)	CTCCGGTGACCTTGTTCCAC	CTGGATACCGGCGATCTTGAA
CHI (LOC123113970)	CGTGTCCGAGCTGGAGG	GATGAACTTGCCCCCGATCT
CHS (LOC123190869)	CTCCAAGATCACCCACCTCG	CATGAGGCGCTTGACGGA
CHS (LOC123088283)	CCTACGCCTAGCCAAAGACC	GAAGAGTCCCTGGGGGATGA
CHS (LOC123047221)	GTCCAAGATCACCCACCTCG	CATCATGAGGCGCTTGACGG
CHS (LOC123055015)	GGTGATCATTGGCGCGGAC	TGAGGAGGTGGAAGGTGAGG
F3H (LOC123042301)	GGACATGGACCAGAAGGTGG	GTGTGACGCTTGAGACCCAG
F3H (LOC100192198)	GGTGCAGGATTGGAGGGAAA	CCACCTCCCGTAGTCCCG
F3H (LOC123186261)	GTGAAGGCGAGGGACTACGG	CACGACAGTCCCATGAGTCG
actin	GGATCTGTATGGTAATGTTGTTCT	CACTGTATTTCCTTTCAGGTGGTG

## Sheet: Table S5
Table S5: The information of metabolome.
Index	Q1 (Da)	Q3 (Da)	Molecular Weight (Da)	Formula	Ionization model	Compounds	Class I	Class II	CAS	Level	SL02-1-1	SL02-1-2	SL02-1-3	PSC1-1	PSC1-2	PSC1-3	mix01	mix02	mix03	cpd_ID	kegg_map
pme0309	183.03	124	184.037	C8H8O5	[M-H]-	3-O-Methylgallic Acid	Tannins	Tannin	3934-84-7	3	7655.7	8804.7	14730	86412	82847	88239	42780	42351	45887	C05616	--
MWSHY0030	255.07	137.02	254.058	C15H10O4	[M+H]+	4',5-Dihydroxyflavone	Flavonoids	Flavones	6665-67-4	3	8684.2	12468	6589.8	11556	10450	7176.4	12476	9965	7062.6	--	--
MWS20151	271.06	153.02	270.053	C15H10O5	[M+H]+	Apigenin; 4',5,7-Trihydroxyflavone	Flavonoids	Flavones	520-36-5	1	67889	75959	76972	80219	79029	78117	70508	69083	69603	C01477	ko00941,ko00943,ko00944,ko01100,ko01110
pme2960	273.08	153	272.068	C15H12O5	[M+H]+	Naringenin chalcone*	Flavonoids	Chalcones	73692-50-9	3	40260	38489	33545	106660	113230	108420	68516	62996	69176	C06561	ko00941,ko01100,ko01110
MWSHY0017	273.08	153.02	272.068	C15H12O5	[M+H]+	(±)-Naringenin; 4',5,7-Trihydroxyflavanone*	Flavonoids	Flavones	67604-48-2	3	37525	47330	45604	119870	131060	126540	81584	76959	74991	--	--
mws0914	271.06	151	272.068	C15H12O5	[M-H]-	Pinobanksin	Flavonoids	Flavanonols	548-82-3	3	9	3875.7	9	27610	31303	25793	12439	17036	11077	C09826	ko00941
pme3475	273.08	153	272.068	C15H12O5	[M+H]+	Butin*	Flavonoids	Flavanones	492-14-8	3	38849	28452	35435	170930	108220	114800	80430	80876	67022	C09614	ko00941
pme1201	273.08	167	274.084	C15H14O5	[M-H]-	Phloretin	Flavonoids	Chalcones	60-82-2	3	9	9	9	43884	2989	4783.1	8414.4	8546.6	8734.6	C00774	ko00941,ko01110
mws0129	285.08	270	284.068	C16H12O5	[M+H]+	Genkwanin (Apigenin 7-methyl ether)*	Flavonoids	Flavones	437-64-9	1	8593.2	10488	11265	14137	14312	13945	12114	11266	11031	C10046	--
mws0918	283.06	268	284.068	C16H12O5	[M-H]-	Prunetin (5,4'-Dihydroxy-7-methoxyisoflavone)*	Flavonoids	Isoflavones	552-59-0	1	50199	61542	63474	98001	100450	96574	69838	71268	72287	C10521	ko00943
mws0051	285.08	270	284.068	C16H12O5	[M+H]+	Acacetin*	Flavonoids	Flavones	480-44-4	1	8862.9	10298	10331	13894	13659	13038	11505	11444	12024	C01470	ko00944
pme0088	285.04	151	286.048	C15H10O6	[M-H]-	Luteolin (5,7,3',4'-Tetrahydroxyflavone)	Flavonoids	Flavones	491-70-3	1	9	9	9	18802	21579	20233	11225	10628	10930	C01514	ko00941,ko00944,ko01100,ko01110
mws1034	287.09	153.02	286.084	C16H14O5	[M+H]+	Isosakuranetin (5,7-Dihydroxy-4'-methoxyflavanone)	Flavonoids	Flavanones	480-43-3	3	9	9	9	11007	12927	13533	7987	7264.7	8170.7	C05334	ko00941,ko01110
Cmsp008121	287.09	167.03	286.084	C16H14O5	[M+H]+	7-O-Methylnaringenin*	Flavonoids	Flavones	-	3	3189.6	5696.4	4186.2	21994	23863	21665	11479	12543	13640	--	--
Lmdp003110	289.07	243.07	288.063	C15H12O6	[M+H]+	2,6,7,4'-Tetrahydroxyisoflavanone	Flavonoids	Dihydroisoflavones	-	1	9	9	9	203880	205730	211010	160180	176250	115680	C16233	ko00943,ko01110
mws0064	287.06	135	288.063	C15H12O6	[M-H]-	Eriodictyol (5,7,3',4'-Tetrahydroxyflavanone)	Flavonoids	Flavanones	552-58-9	3	9	9	9	17635	13042	15335	9246.1	9349.4	8927.7	C05631	ko00941,ko01100,ko01110
mws0054	289.07	245	290.079	C15H14O6	[M-H]-	Catechin	Flavonoids	Flavanols	154-23-4	3	9	9	9	23821	22496	28499	20565	19543	19843	C06562	ko00941,ko01110
pmp001204	299.09	284.1	298.084	C17H14O5	[M+H]+	Apigenin-7,4'-dimethyl ether	Flavonoids	Flavones	5128-44-9	1	11562	17584	19191	309230	350310	319340	174410	175310	175830	C10019	--
Lmjp004941	301.07	286.05	300.063	C16H12O6	[M+H]+	Rhamnocitrin (7-Methylkaempferol)*	Flavonoids	Flavonols	569-92-6	1	73305	92427	93883	965620	876940	889640	457940	458540	439930	C17059	--
mws0058	299.06	284	300.063	C16H12O6	[M-H]-	Diosmetin (5,7,3'-Trihydroxy-4'-methoxyflavone)	Flavonoids	Flavones	520-34-3	1	98802	116920	117550	1168000	1173300	1122600	630320	638590	651820	C10038	--
pmp000001	301.07	286.05	300.063	C16H12O6	[M+H]+	Hispidulin (5,7,4'-Trihydroxy-6-methoxyflavone)*	Flavonoids	Flavones	1447-88-7	1	71252	80973	87235	880340	879050	851040	456160	432140	437970	C10058	--
MWS20189	301.07	286.05	300.063	C16H12O6	[M+H]+	Tectorigenin*	Flavonoids	Isoflavones	548-77-6	1	64423	81098	84586	892190	881150	804890	444990	441590	449180	C10534	--
Lmmp005689	301.07	258.05	300.063	C16H12O6	[M+H]+	Cajanin	Flavonoids	Isoflavones	32884-36-9	1	6566.8	5619.5	6122.3	59544	64235	62804	34348	31865	33196	C10203	--
Lmhn004976	299.06	284.02	300.063	C16H12O6	[M-H]-	Aracarpene 2*	Flavonoids	Isoflavones	-	1	99600	109900	111780	1207600	1144400	1090500	623600	636090	623130	--	--
Lmhn005110	299.06	284.02	300.063	C16H12O6	[M-H]-	Aracarpene 1*	Flavonoids	Isoflavones	1261245-78-6	1	82569	83002	78774	667080	781870	782950	492850	461810	425960	--	--
Zmpn004713	301.04	149.03	302.043	C15H10O7	[M-H]-	Isoetin (5,7,2',4',5'-Pentahydroxyflavone)*	Flavonoids	Flavones	1621-84-7	3	3763.7	4749.1	5325.4	6251.4	5916.9	5685.2	2991.8	3450.3	3680.2	C10079	--
Lmbn006032	301.04	149.02	302.043	C15H10O7	[M-H]-	Hypolaetin*	Flavonoids	Flavones	27696-41-9	3	2922.7	2173.7	2658.3	9	9	9	2653.7	2585.7	2886	C10078	--
Zmap007870	303.09	167.03	302.079	C16H14O6	[M+H]+	Blumeatin*	Flavonoids	Flavanones	118024-26-3	3	9	9	9	100790	83954	96944	51125	52515	53706	--	--
mws1033	303.09	153.02	302.079	C16H14O6	[M+H]+	Homoeriodictyol	Flavonoids	Flavanones	446-71-9	3	16474	15593	19152	25931	25679	28226	22137	18297	17957	C09756	ko00941
Cmsp007228	303.09	167.03	302.079	C16H14O6	[M+H]+	7-O-Methyleriodictyol*	Flavonoids	Flavanols	51857-11-5	3	9	9	9	104150	84091	94345	53363	54821	54173	--	--
mws0044	303.05	125.02	304.058	C15H12O7	[M-H]-	Dihydroquercetin(Taxifolin)	Flavonoids	Flavanonols	480-18-2	3	6534	9458.5	7695.6	50528	50373	36927	27172	26335	31351	C01617	ko00941,ko01100,ko01110
pmp000106	313.11	298.1	312.1	C18H16O5	[M+H]+	5,7,4'-Trimethoxyflavone	Flavonoids	Flavones	5631-70-9	3	9	9	9	6478.9	4840.3	8025	3457.5	3179.1	3706.8	--	--
pmp000804	313.14	277.2	312.136	C19H20O4	[M+H]+	Isobavachalcone D	Flavonoids	Chalcones	-	2	15405	15755	16823	13075	12973	15182	16207	14857	14314	--	--
Zmjp006969	315.09	282.05	314.078	C17H14O6	[M+H]+	Pectolinarigenin	Flavonoids	Flavones	520-12-7	2	37901	21982	28772	19514	18536	26569	42961	26508	17343	--	--
mws1174	313.07	253	314.079	C17H14O6	[M-H]-	3-O-Acetylpinobanksin	Flavonoids	Flavanonols	52117-69-8	3	44989	55484	54648	48213	36674	15068	41387	53467	53704	C16418	ko00941
pmp000784	315.09	254.06	314.079	C17H14O6	[M+H]+	Cirsimaritin (4',5-dihydroxy-6,7-dimethoxyflavone)	Flavonoids	Flavones	6601-62-3	2	2810.3	3172.8	2982.2	4751.9	5415.4	4990.3	2277.8	4009.8	4926.3	C17785	--
pmp000003	317.07	302.04	316.058	C16H12O7	[M+H]+	Nepetin (5,7,3',4'-Tetrahydroxy-6-methoxyflavone)	Flavonoids	Flavones	520-11-6	3	2479.9	2313.7	2271.3	6549.7	3317.1	5506.5	5053.5	3798.1	3772.7	--	--
mws0066	315.05	151	316.058	C16H12O7	[M-H]-	Isorhamnetin	Flavonoids	Flavonols	480-19-3	3	9	9	9	10572	11461	10125	7378.6	7966.6	5999.6	C10084	--
Lmmp006082	317.1	167.03	316.094	C17H16O6	[M+H]+	Cajanol	Flavonoids	Isoflavones	61020-70-0	2	9	9	9	10561	14506	13267	6940.7	7352	6480.3	C10204	--
pmf0392	317.1	167.04	316.095	C17H16O6	[M+H]+	Persicogenin (5,3'-dihydroxy-7,4'-dimethoxyflavanone)	Flavonoids	Flavanones	28590-40-1	3	174600	222410	222430	7964300	8662000	8299000	4068400	4044200	4166000	--	--
mws0744	319.05	301	320.053	C15H12O8	[M-H]-	Dihydromyricetin (Ampelopsin)	Flavonoids	Flavanonols	27200-12-0	3	45870	69378	49532	118070	128040	121080	79865	82933	84856	C02906	ko00941,ko01110
Lmqn009304	325.11	293.08	326.115	C19H18O5	[M-H]-	Eucalyptin (5-Hydroxy-7,4'-dimethoxy-6,8-dimethylflavone)	Flavonoids	Flavanones	3122-88-1	3	260460	432640	449710	568560	569880	546270	539620	544390	545250	--	--
pmp000107	329.1	314.1	328.095	C18H16O6	[M+H]+	Monohydroxy-trimethoxyflavone	Flavonoids	Flavones	-	3	9	9	9	8432.5	7537.7	9344.5	3711.1	4027.5	3986.5	--	--
Lmjp007790	329.1	314.08	328.095	C18H16O6	[M+H]+	5-Hydroxy-3,7,4'-trimethoxyflavone	Flavonoids	Flavones	-	3	33174	38802	38518	9	9	9	23797	23487	24536	--	--
Lmzp004885	331.08	315.05	330.074	C17H14O7	[M+H]+	Tricin (5,7,4'-Trihydroxy-3',5'-dimethoxyflavone)	Flavonoids	Flavones	520-32-1	2	148040	205800	191780	451390	439640	405920	274410	280690	293590	C10193	--
mws0917	329.07	314	330.074	C17H14O7	[M-H]-	3,7-Di-O-methylquercetin*	Flavonoids	Flavonols	552-54-5	1	49505	60551	62098	37810	37546	37582	43491	43599	42970	C01265	ko00944
Lmjn007168	329.07	271.03	330.074	C17H14O7	[M-H]-	Quercetin-3,3'-dimethyl ether*	Flavonoids	Flavonols	4382-17-6	1	5918.4	7538.9	7514.1	5056	5717.5	5311.8	6195.6	5998	5414.1	--	--
Lmjp005016	331.08	298.05	330.074	C17H14O7	[M+H]+	Cirsiliol (3',4',5-Trihydroxy-6,7-Dimethoxyflavone)	Flavonoids	Flavanones	34334-69-5	2	4671.1	6009.6	5395.3	12258	12115	12335	8574.2	7471.9	9195.5	C10033	--
pmn001519	335.04	124	336.048	C15H12O9	[M-H]-	Galloyl Methyl gallate	Tannins	Tannin	-	3	7082.5	6212.7	6171.9	9	9	9	6127	5932.3	7554.5	--	--
MWSHY0118	343.12	282.09	342.11	C19H18O6	[M+H]+	5,6,7,4'-Tetramethoxyflavone*	Flavonoids	Flavones	1168-42-9	1	40895	44480	46648	246650	240640	235590	144170	137270	134040	C14472	--
MWSHY0128	343.12	313.08	342.11	C19H18O6	[M+H]+	5,7,8,4'-Tetramethoxyflavone*	Flavonoids	Flavones	6601-66-7	1	16014	18932	17636	46020	43575	42351	33976	26785	27885	--	--
Lmsp009872	343.12	299.09	342.11	C19H18O6	[M+H]+	3',4',5,7-Tetramethoxyflavone; Luteolin Tetramethyl Ether*	Flavonoids	Flavones	855-97-0	1	21402	23763	21135	117460	109960	124880	62449	57569	61425	--	--
Zmhp004065	345.1	330.07	344.089	C18H16O7	[M+H]+	7,8-Dihydroxy-5,6,4'-trimethoxyflavone*	Flavonoids	Flavones	-	1	16111	19916	15700	45531	47101	45617	35050	28658	28249	--	--
pmp000786	345.1	330.07	344.09	C18H16O7	[M+H]+	Eupatorin; 3',5-Dihydroxy-4',6,7-Trimethoxyflavone*	Flavonoids	Flavones	855-96-9	1	16111	19916	15700	45531	47101	45617	35050	28658	28249	--	--
pmp000006	345.1	330.07	344.09	C18H16O7	[M+H]+	Eupatilin (5,7-Dihydroxy-3',4',6-Trimethoxyflavone)*	Flavonoids	Flavones	22368-21-4	1	16111	19916	15700	45531	47101	45617	35050	28658	28249	C10040	--
Lmjn005592	343.08	313.04	344.09	C18H16O7	[M-H]-	Cirsilineol (4',5-Dihydroxy-3',6,7-trimethoxyflavone)	Flavonoids	Flavanones	41365-32-6	2	59567	81348	75688	112450	108100	109200	99971	83175	82101	C10032	--
mws1474	345.1	284	344.09	C18H16O7	[M+H]+	5,7-Dihydroxy-3',4',5'-trimethoxyflavone*	Flavonoids	Flavones	18103-42-9	1	82571	76412	61990	77132	77265	73429	113800	72706	49418	C19807	--
mws1002	345.06	330	346.069	C17H14O8	[M-H]-	Syringetin	Flavonoids	Flavones	4423-37-4	3	9	9	9	1895.5	3483.4	2170.3	2332.6	2536.3	2439.9	C11620	ko00944
Zmsp007375	373.13	343.08	372.121	C20H20O7	[M+H]+	3,5,7,3'4'-Pentamethoxyflavone*	Flavonoids	Flavones	1247-97-8	1	26057	33132	23891	146360	148240	125520	97786	86124	79329	--	--
MWSHY0027	373.13	343.09	372.121	C20H20O7	[M+H]+	Tangeretin (4',5,6,7,8-Pentamethoxyflavone)	Flavonoids	Flavones	481-53-8	1	161470	181530	175060	352990	357840	359160	248020	229950	229690	C10190	--
mws1313	373.13	312.1	372.121	C20H20O7	[M+H]+	Sinensetin (5,6,7,3',4'-pentamethoxyflavone)	Flavonoids	Flavones	2306-27-6	2	52980	41039	44403	234250	262890	280700	145390	141430	119940	C10186	--
Lmcp007155	373.13	343.08	372.121	C20H20O7	[M+H]+	3',4',5',5,7-Pentamethoxyflavone*	Flavonoids	Flavones	53350-26-8	1	15036	14623	6916	28752	28849	30801	18666	20480	19375	--	--
mws0043	403.14	373.1	402.131	C21H22O8	[M+H]+	Nobiletin (5,6,7,8,3',4'-Hexamethoxyflavone)	Flavonoids	Flavones	478-01-3	1	287180	341080	310600	1538600	1513000	1536400	914990	845300	833680	C10112	--
pmb3031	403.1	313.1	404.111	C20H20O9	[M-H]-	Tricin-4'-O-glycerol	Flavonoids	Flavones	-	2	13820	20329	22083	25068	24451	26816	21271	21642	20561	--	--
HJAP012	419.1	383.07	418.09	C20H18O10	[M+H]+	Luteolin-8-C-arabinoside	Flavonoids	Flavonoid carbonoside	-	3	54340	48238	112860	103050	140200	139650	90359	109480	72313	--	--
pma6218	419.1	383.1	418.126	C21H22O9	[M+H]+	O-MethylNaringenin-8-C-arabinoside	Flavonoids	Flavones	-	3	168460	190440	174180	366050	340240	360470	273120	276300	249150	--	--
Hmhp002834	419.1	287.06	419.097	C20H19O10+	[M]+	Cyanidin 3-xyloside*	Flavonoids	Anthocyanidins	29761-24-8	3	9	9	9	560390	605700	602790	290400	295790	294900	--	--
Smlp002532	419.1	287.06	419.097	C20H19O10+	[M]+	Cyanidin-3-O-arabinoside*	Flavonoids	Anthocyanidins	27214-72-8	3	9	9	9	560390	605700	602790	290400	295790	294900	--	--
pmp001033	423.09	405.08	422.085	C19H18O11	[M+H]+	Isomangiferin	Flavonoids	Other Flavonoids	24699-16-9	3	608500	719820	635140	742650	764530	733060	577110	638840	647510	C16979	--
MWSHY0063	433.11	271.06	432.106	C21H20O10	[M+H]+	Sophoricoside	Flavonoids	Isoflavones	152-95-4	1	552270	723340	814120	1049700	1039000	995270	828350	819110	820690	--	--
pme0321	431.1	285	432.106	C21H20O10	[M-H]-	Kaempferol-7-O-rhamnoside*	Flavonoids	Flavonols	20196-89-8	3	5748.6	6399.6	7334.3	9	9	9	4241.8	4103.1	3589.5	--	--
MWS20149	433.11	271.07	432.106	C21H20O10	[M+H]+	Apigenin-7-O-α-D-glucopyranoside*	Flavonoids	Flavones	-	1	646220	744470	821470	1096000	1178400	1114400	858430	850000	941550	--	--
mws0919	431.1	285	432.106	C21H20O10	[M-H]-	Kaempferol-3-O-rhamnoside (Afzelin)(Kaempferin)*	Flavonoids	Flavonols	482-39-3	3	5748.6	6399.6	7334.3	9	9	9	4241.8	4103.1	3589.5	C16911	ko00944
mws0072	433.11	271.01	432.106	C21H20O10	[M+H]+	Apigenin-5-O-glucoside*	Flavonoids	Flavones	28757-27-9	1	213510	280570	309930	9	9	9	93386	82785	152640	--	--
MWS20148	433.11	271.07	432.106	C21H20O10	[M+H]+	Apigenin-3'-O-α-D-glucopyranoside*	Flavonoids	Flavones	-	1	646220	744470	821470	1096000	1178400	1114400	858430	850000	941550	--	--
mws1434	431.1	311	432.106	C21H20O10	[M-H]-	Apigenin-6-C-glucoside (Isovitexin)*	Flavonoids	Flavonoid carbonoside	29702-25-8	3	105200	109640	124510	60983	55447	49371	75053	67729	66637	C01714	ko00944
MWSHY0189	433.11	271.07	432.106	C21H20O10	[M+H]+	Apigenin-7-O-glucoside(Cosmosiin)*	Flavonoids	Flavones	578-74-5	1	589170	681180	743210	931590	931300	1154700	840860	802970	896660	C04608	ko00944
Lmgp004731	433.11	271.06	432.106	C21H20O10	[M+H]+	Genistein-7-O-galactoside	Flavonoids	Isoflavones	-	1	546980	670950	723180	1002900	1020900	965700	951060	804360	812520	--	--
mws0048	431.1	311	432.106	C21H20O10	[M-H]-	Apigenin-8-C-Glucoside (Vitexin)*	Flavonoids	Flavonoid carbonoside	3681-93-4	3	93146	84996	97917	46743	48388	51567	58957	59752	60430	C01460	ko00941,ko00944
Lmgp003335	433.11	271.06	432.106	C21H20O10	[M+H]+	4',5-Dihydroxyisoflavone-7-O-galactoside	Flavonoids	Isoflavones	-	1	398640	554620	508940	827360	846830	827320	632040	620490	649660	--	--
pmp000117	433.15	403.11	432.142	C22H24O9	[M+H]+	3,5,6,7,8,3',4'-Heptamethoxyflavone	Flavonoids	Flavonols	1178-24-1	2	74306	109950	99525	410990	414070	410780	221480	217120	216090	--	--
pme3392	433.11	271.06	433.113	C21H21O10+	[M]+	Pelargonidin-3-O-glucoside	Flavonoids	Anthocyanidins	47684-27-5	3	9	9	9	1526000	1552800	1574100	834920	774520	806030	C12137	ko00942,ko01100,ko01110
mws2186	435.09	303	434.085	C20H18O11	[M+H]+	Avicularin(Quercetin-3-O-α-L-arabinofuranoside)	Flavonoids	Flavonols	572-30-5	3	16813	17797	24761	84998	75672	69893	54693	28992	33450	--	--
Lmdp003509	435.09	303.06	434.085	C20H18O11	[M+H]+	Quercetin-3-O-xyloside (Reynoutrin)	Flavonoids	Flavonols	549-32-6	3	18819	18742	23161	99688	97312	85106	61076	61764	62499	--	--
pmb0744	435.11	331.08	434.1	C24H18O8	[M+H]+	Tricin-4'-O-Benzoic Acid	Flavonoids	Flavones	-	3	5278.1	6513.3	5535.9	11949	6277.6	11281	7424.3	6538.4	9209.8	--	--
HJN087	433.12	271.06	434.121	C21H22O10	[M-H]-	Naringenin-4'-O-glucoside*	Flavonoids	Flavanones	-	2	15228	21237	17918	169640	168910	167380	98961	95626	89725	--	--
Lmlp006175	435.13	273.09	434.121	C21H22O10	[M+H]+	Isosalipurposide (Phlorizin Chalcone)*	Flavonoids	Chalcones	4547-85-7	2	13919	22532	18790	157500	194350	180480	98802	86738	75120	C16406	ko00941
HJN090	433.11	271.06	434.121	C21H22O10	[M-H]-	Butin-7-O-glucoside*	Flavonoids	Flavanones	-	2	19728	22799	21423	159900	166840	175830	102630	109320	103820	--	--
mws1179	433.11	271	434.121	C21H22O10	[M-H]-	Naringenin-7-O-glucoside (Prunin)*	Flavonoids	Flavanones	529-55-5	2	3922.9	6043.9	4615.1	38883	38333	35255	21089	23538	23188	C09099	ko00941
mws2118	435.13	166.7	436.137	C21H24O10	[M-H]-	Phloretin-2'-O-glucoside (Phlorizin)	Flavonoids	Chalcones	60-81-1	3	7145.8	7563.6	12138	1907500	9	9	336290	382330	377450	C01604	ko00941,ko01110
mws0355	441.08	169.02	442.09	C22H18O10	[M-H]-	Catechin gallate*	Flavonoids	Flavanols	130405-40-2	3	17251	21576	19644	26483	24813	26989	19841	20162	22074	--	--
mws1397	441.08	169	442.09	C22H18O10	[M-H]-	Epicatechin gallate*	Flavonoids	Flavanols	1257-08-5	3	20292	28280	24070	31827	26793	28525	19959	21520	22440	--	--
pmn001697	445.08	269.05	446.085	C21H18O11	[M-H]-	Apigenin-7-O-glucuronide	Flavonoids	Flavones	29741-09-1	3	9	9	9	80577	92062	96214	55730	50812	58015	--	--
Hmcp002316	449.11	317.06	448.1	C21H20O11	[M+H]+	Isorhamnetin-3-O-arabinoside	Flavonoids	Flavonols	-	3	9	9	9	43591	54029	46805	21444	21805	20672	--	--
Xmyp005654	449.11	287.06	448.101	C21H20O11	[M+H]+	Kaempferol-4'-O-glucoside*	Flavonoids	Flavonols	-	1	177340	139360	255240	1894900	2135900	2066700	1148200	1150900	1146900	--	--
pme2459	449.11	287.2	448.101	C21H20O11	[M+H]+	Luteolin-7-O-glucoside (Cynaroside)*	Flavonoids	Flavones	5373-11-5	1	804270	737920	1099900	5163500	1956200	3722500	2837800	2549600	3623000	C03951	ko00944
Lmlp003531	449.11	287.06	448.101	C21H20O11	[M+H]+	Luteolin-3'-O-glucoside*	Flavonoids	Flavones	5154-41-6	1	9	9	9	1912600	1809900	1830600	1062200	862770	1117800	--	--
mws1608	447.09	357.1	448.101	C21H20O11	[M-H]-	Luteolin-6-C-glucoside (Isoorientin)	Flavonoids	Flavonoid carbonoside	4261-42-1	3	35380	32492	29262	17010	17006	19279	29087	16282	21954	C01821	--
Lmsp004915	449.11	287.06	448.101	C21H20O11	[M+H]+	Aureusidin-4-O-glucoside	Flavonoids	Aurones	-	2	9	231110	88075	2078800	2087800	2026600	1239700	986100	1159600	--	--
mws2209	449.11	287.06	448.101	C21H20O11	[M+H]+	Kaempferol-3-O-glucoside (Astragalin)*	Flavonoids	Flavonols	480-10-4	1	162410	9	160620	2284700	2121300	1871200	1322700	1070100	1240600	C12249	ko00944,ko01110
mws0089	447.09	285.04	448.101	C21H20O11	[M-H]-	Kaempferol-7-O-glucoside	Flavonoids	Flavonols	16290-07-6	2	19846	11916	10703	177060	156020	155310	105160	107830	104300	--	--
mws0913	447.09	285	448.101	C21H20O11	[M-H]-	Kaempferol-3-O-galactoside (Trifolin)	Flavonoids	Flavonols	23627-87-4	2	15247	20052	25623	136570	233410	123100	98712	99033	150770	C12626	ko00944
MWS20150	449.11	287.07	448.101	C21H20O11	[M+H]+	luteolin-7-O-β-D-glucopyranoside*	Flavonoids	Flavones	-	1	365750	965260	769360	974280	4624300	3238500	2477800	1287600	2845600	--	--
Hmpp003270	449.11	287.05	448.101	C21H20O11	[M+H]+	Luteolin-4'-O-glucoside	Flavonoids	Flavones	6920-38-3	3	122210	126570	148260	2170800	2021600	2073900	1262700	1145200	1071500	--	--
mws0045	449.11	303.05	448.101	C21H20O11	[M+H]+	Quercetin-3-O-rhamnoside(Quercitrin)	Flavonoids	Flavonols	522-12-3	3	24721	26566	21752	8043.5	10005	7447	7321.1	13855	10031	C01750	ko00944
mws1361	449.11	151	450.116	C21H22O11	[M-H]-	Astilbin	Flavonoids	Flavanonols	29838-67-3	3	4567.2	4490.5	9	19965	12960	12843	10917	8885.1	13195	C17449	--
Lmtn002796	449.1	287.05	450.116	C21H22O11	[M-H]-	Aromadendrin-7-O-glucoside*	Flavonoids	Flavanonols	28189-90-4	1	9	9	9	2030000	2413400	2132000	1351500	1461300	1391000	--	--
Jmgn004021	449.11	269.05	450.116	C21H22O11	[M-H]-	6-C-Glucosyl-2-Hydroxynaringenin	Flavonoids	Flavanones	-	2	1803600	2450100	2699400	3419500	3739300	3880500	3064800	2866200	2918300	--	--
pmb3023	449.11	287	450.116	C21H22O11	[M-H]-	Eriodictyol-8-C-glucoside*	Flavonoids	Flavanones	1023271-51-3	1	9	9	9	1007700	964670	1175600	718810	622400	629700	--	--
pmn001416	451.1	341.06	452.111	C24H20O9	[M-H]-	Catechin-(7,8-bc)-4α-(3,4-dihydroxyphenyl)-dihydro-2-(3H)-one	Flavonoids	Flavanols	-	3	7613.8	11204	9142.7	9	9	9	5239.4	5570	7234.1	--	--
HJN041	451.12	289.07	452.131	C21H24O11	[M-H]-	Epicatechin glucoside	Flavonoids	Flavanols	-	3	12978	32236	24943	33698	50909	38958	30212	33421	24828	--	--
mws0034	457.08	169	458.085	C22H18O11	[M-H]-	Epigallocatechin-3-gallate*	Flavonoids	Flavanols	989-51-5	3	23350	23447	18872	11131	17563	17445	16507	14625	15717	C09731	--
mws0351	457.08	169.02	458.085	C22H18O11	[M-H]-	Gallate catechin gallate*	Flavonoids	Flavanols	4233-96-9	3	26997	32157	30141	20034	20654	21366	23726	21656	18859	--	--
mws2220	457.08	169.02	458.085	C22H18O11	[M-H]-	Gallocatechin 3-O-gallate*	Flavonoids	Flavanols	5127-64-0	3	25838	39926	32904	23749	23269	26408	27994	26211	25951	--	--
mws4167	463.09	287.06	462.08	C21H18O12	[M+H]+	Luteolin-7-O-glucuronide	Flavonoids	Flavones	29741-10-4	3	33735	9	19048	115240	93176	102180	82884	105220	92811	C03515	ko00944
Lmzn001894	461.07	285.04	462.08	C21H18O12	[M-H]-	Kaempferol-3-O-glucuronide*	Flavonoids	Flavonols	22688-78-4	3	9	9	9	84095	93220	100350	41426	46359	46931	--	--
pmn001702	461.07	285.05	462.08	C21H18O12	[M-H]-	Tetahydroxyflavone-7-O-glucuronide*	Flavonoids	Flavones	-	3	9	9	9	78903	74291	83103	48305	47097	47642	--	--
Lmnp002845	463.13	343.09	462.116	C22H22O11	[M+H]+	Hispidulin-8-C-glucoside	Flavonoids	Flavonoid carbonoside	-	2	108480	148010	151470	23717	28677	37140	55288	66504	65230	--	--
HJAP011	463.11	343.08	462.116	C22H22O11	[M+H]+	Chrysoeriol-8-C-glucoside (Scoparin)	Flavonoids	Flavonoid carbonoside	301-16-6	2	86997	110060	115180	10783	22199	22688	39759	41318	55325	--	--
pmb3012	461.11	299.2	462.116	C22H22O11	[M-H]-	Chrysoeriol-7-O-glucoside	Flavonoids	Flavones	19993-32-9	2	32395	46293	46702	451760	365000	286400	277450	277500	295510	--	--
Lmjp003655	463.12	301.08	462.116	C22H22O11	[M+H]+	6-C-MethylKaempferol-3-glucoside	Flavonoids	Flavones	-	1	641920	694740	801480	14959000	17997000	17054000	9581500	8862900	7589100	--	--
Hmmp004965	463.12	301.07	462.116	C22H22O11	[M+H]+	Diosmetin-7-O-glucoside*	Flavonoids	Flavones	20126-59-4	1	533560	723400	723190	15837000	15725000	16202000	8801800	9110300	8399500	--	--
Zmgp004060	463.12	301.07	462.116	C22H22O11	[M+H]+	paratensein-7-O-glucoside	Flavonoids	Flavones	-	1	495820	731290	775680	16610000	14736000	16296000	8325200	9085200	8721700	--	--
pmp000120	463.12	427.1	462.116	C22H22O11	[M+H]+	Diosmetin-6-C-glucoside	Flavonoids	Flavones	-	3	71818	81979	100580	27507	14642	14535	36257	38991	51552	--	--
pmp000579	463.12	301.07	462.116	C22H22O11	[M+H]+	Diosmetin-7-O-galactoside*	Flavonoids	Flavones	-	1	593650	693240	699500	16715000	15832000	16907000	8551300	8989500	8491900	--	--
Hmgp002189	463.13	301.07	462.118	C22H22O11	[M+H]+	Hispidulin-7-O-Glucoside	Flavonoids	Flavones	17680-84-1	1	479130	640570	769920	14903000	15822000	15807000	7638800	7707600	8538500	C17762	--
mws0061	463.09	300	464.095	C21H20O12	[M-H]-	Quercetin-3-O-galactoside (Hyperin)	Flavonoids	Flavonols	482-36-0	1	170080	60501	67553	1919900	1574000	2098800	1103700	1180800	1141400	C10073	--
Smgp004575	465.1	303.05	464.095	C21H20O12	[M+H]+	Quercetin-5-O-β-D-glucoside	Flavonoids	Flavonols	-	1	354870	139060	124420	2937300	2991800	2928400	1648600	1752400	1809700	--	--
Zmhp004034	465.1	303.05	464.095	C21H20O12	[M+H]+	Rhodiolgin	Flavonoids	Flavonols	94696-39-6	2	9	9	9	993360	706470	426660	401550	574300	377260	--	--
pmp001309	465.1	303.1	464.095	C21H20O12	[M+H]+	6-Hydroxykaempferol-7-O-glucoside	Flavonoids	Flavonols	-	1	83566	99880	107240	806810	863950	1237000	687060	866100	567690	--	--
Hmcn001884	463.09	301.03	464.095	C21H20O12	[M-H]-	6-Hydroxyluteolin 5-glucoside	Flavonoids	Flavones	-	1	153350	52911	47504	902510	856460	942090	515110	480170	540970	--	--
mws0856	463.09	301	464.095	C21H20O12	[M-H]-	Spiraeoside*	Flavonoids	Flavonols	20229-56-5	1	150480	48671	50977	875500	927670	913490	609430	562220	696490	--	--
MWSHY0046	465.1	303.05	464.095	C21H20O12	[M+H]+	Quercetin-3-O-glucoside (Isoquercitrin)	Flavonoids	Flavonols	482-35-9	1	396150	107660	135890	2985100	2597000	3015500	1648600	1780500	1636700	C05623	ko00944,ko01100,ko01110
mws1329	463.09	301.03	464.095	C21H20O12	[M-H]-	Quercetin-7-O-glucoside*	Flavonoids	Flavonols	491-50-9	1	161490	28428	36924	1050600	1179800	1202700	638890	594650	632040	C12639	--
Lmzp002365	465.14	303.09	464.131	C22H24O11	[M+H]+	Hesperetin-7-O-glucoside	Flavonoids	Flavones	31712-49-9	3	112680	15937	47279	536110	628710	574490	378750	317910	293310	C16422	ko00941
pme1598	463.12	301	464.132	C22H24O11	[M-H]-	Hesperetin-5-O-glucoside	Flavonoids	Flavanonols	69651-80-5	3	205520	66356	73486	1154700	1024600	1097300	716870	716180	713060	--	--
pmp000581	475.12	271.06	474.116	C23H22O11	[M+H]+	Apigenin-7-O-(6''-acetyl)glucoside	Flavonoids	Flavones	72741-92-5	3	6288.3	7207.5	7777.6	15200	35752	15545	14901	9974.4	12839	--	--
Zmbp003860	475.13	271.07	475.123	C23H23O11+	[M]+	Pelargonidin-3-O-(6''-O-acetyl)glucoside	Flavonoids	Anthocyanidins	-	2	9	9	9	8218100	8250300	8050900	4452100	4234600	3878300	--	--
pmp000583	477.1	301.07	476.095	C22H20O12	[M+H]+	Diosmetin-7-O-glucuronide	Flavonoids	Flavones	35110-20-4	1	25861	26392	24023	9292000	9716900	8791900	5027200	5367400	5160000	--	--
Lmmp003783	479.09	303.05	478.075	C21H18O13	[M+H]+	Quercetin-3-O-glucuronide	Flavonoids	Flavonols	22688-79-5	3	9	9	9	149500	173290	159580	103310	111150	108600	--	--
Lmfn003760	477.07	301.04	478.075	C21H18O13	[M-H]-	Quercetin-4'-O-glucuronide	Flavonoids	Flavonols	201463-36-7	3	44813	16032	16430	12698	12145	10989	14020	19193	12817	--	--
Hmcp002207	479.12	317.06	478.111	C22H22O12	[M+H]+	Isorhamnetin-7-O-glucoside (Brassicin)*	Flavonoids	Flavonols	6743-96-0	1	57067	57043	63737	1903200	2086700	1896100	935070	791250	942070	--	--
pma0214	479	317.1	478.111	C22H22O12	[M+H]+	6-C-Methylquercetin-3-O-glucoside*	Flavonoids	Flavonols	-	2	32210	73332	59700	451070	592620	1027300	487940	504090	419190	--	--
Lmjp002906	479.12	317.07	478.111	C22H22O12	[M+H]+	Rhamnetin-3-O-Glucoside*	Flavonoids	Flavonols	27875-34-9	1	67486	68161	90635	1928300	2003200	1963100	1024500	1040600	1059200	--	--
Lmjp003295	479.12	317.07	478.111	C22H22O12	[M+H]+	6-Methoxykaempferol-3-O-glucoside*	Flavonoids	Flavonols	63422-27-5	2	61135	87849	77773	795320	432890	378530	580370	564010	607680	--	--
Hmgp002036	479.12	317.06	478.112	C22H22O12	[M+H]+	Nepetin-7-O-glucoside(Nepitrin)	Flavonoids	Flavones	569-90-4	2	57067	57043	63737	1903200	2086700	1896100	935070	791250	942070	--	--
mws1454	477.14	315	478.148	C23H26O11	[M-H]-	Persicoside	Flavonoids	Flavanones	28978-03-2	3	20985	24889	26817	9	9	10139	12303	12007	14740	--	--
pmb2975	477.14	357.1	478.148	C23H26O11	[M-H]-	Hesperetin-3'-O-glucuronide	Flavonoids	Flavanonols	1237479-05-8	3	3697.2	7482.4	7553.5	9	9	9	7967.2	3257.2	5623.7	--	--
Lmtp003948	481.13	319.05	480.127	C22H24O12	[M+H]+	3',5',5,7-Tetrahydroxy-4'-methoxyflavanone-3'-O-glucoside	Flavonoids	Flavones	-	2	21033	9	7070.7	141990	155310	147870	92355	106500	80452	--	--
pmn001629	483.08	169	484.085	C20H20O14	[M-H]-	Digalloylglucose	Tannins	Tannin	-	3	8251.7	10558	10641	15134	15459	13683	10957	11794	12011	--	--
Lmmn003398	489.11	285.04	490.111	C23H22O12	[M-H]-	Kaempferol-3-O-(6''-acetyl)glucoside	Flavonoids	Flavonols	-	1	9	9	9	226920	244860	168620	107940	96539	115450	--	--
Lmpp003059	491.12	287.06	491.118	C23H23O12+	[M]+	Cyanidin-3-O-(6''-O-acetyl)glucoside	Flavonoids	Anthocyanidins	-	2	9	9	9	88665000	76975000	90662000	46575000	44271000	49323000	--	--
Lmgp004829	493.13	331.08	492.127	C23H24O12	[M+H]+	5,7,4'-Trihydroxy-6,8-dimethoxyisoflavone-7-O-galactoside*	Flavonoids	Isoflavones	-	1	661580	819560	863040	1557400	1497600	1491700	1213400	1249600	1118500	--	--
pmb3042	491.12	329.1	492.127	C23H24O12	[M-H]-	Tricin-5-O-Glucoside*	Flavonoids	Flavones	32769-00-9	1	902380	880540	901750	1009300	1036100	895430	883210	917180	863720	--	--
Lmgp003546	493.13	331.08	492.127	C23H24O12	[M+H]+	4',5'-Dihydroxy-6,8-dimethoxyisoflavone-7-O-galactoside*	Flavonoids	Isoflavones	-	1	183490	262050	243450	477030	474920	500320	364780	354700	395770	--	--
pmb0736	493.13	331.08	492.127	C23H24O12	[M+H]+	Tricin-7-O-Glucoside*	Flavonoids	Flavones	32769-01-0	1	661580	819560	863040	1557400	1497600	1491700	1213400	1249600	1118500	--	--
Hmgp002238	493.14	331.08	492.128	C23H24O12	[M+H]+	Jaceosidin-7-O-Glucoside	Flavonoids	Flavones	25474-11-7	1	251250	261770	152340	485000	531480	487830	433060	301670	386180	--	--
pmb0745	497.14	331.08	496.137	C26H24O10	[M+H]+	Tricin-4'-O-syringyl alcohol	Flavonoids	Flavones	-	3	34666	47018	54593	61979	59685	53298	50882	49906	53686	--	--
pmn001642	503.08	459.1	504.09	C23H20O13	[M-H]-	Kaempferol-3-O-(2''-O-acetyl)glucuronide	Flavonoids	Flavonols	-	3	191560	187700	146070	359620	365290	350560	273450	250360	262440	--	--
pmb3000	503.12	341.1	504.127	C24H24O12	[M-H]-	Chrysoeriol-7-O-(6''-acetyl)glucoside	Flavonoids	Flavones	-	3	60622	41442	53412	110040	70800	96608	100350	84998	121010	--	--
Lmxp003068	505.09	287.06	505.098	C23H21O13+	[M]+	Cyanidin-3-O-(6''-O-malonyl)arabinoside	Flavonoids	Anthocyanidins	-	3	9	9	9	327290	344780	342470	183230	191680	158080	--	--
Smpp002603	505.13	301.07	505.134	C24H25O12+	[M]+	Peonidin-3-O-(6''-O-Acetyl)glucoside	Flavonoids	Anthocyanidins	-	3	9	9	9	51130000	67319000	75651000	60836000	34849000	39698000	--	--
Zmsp004363	507.12	303.05	506.106	C23H22O13	[M+H]+	Quercetin-3-O-(6''-O-acetyl)glucoside	Flavonoids	Flavonols	-	1	9	9	9	2483300	2638200	2602200	1419700	1321900	1455500	--	--
pmb3045	505.1	329.1	506.106	C23H22O13	[M-H]-	Tricin-7-O-Glucuronide*	Flavonoids	Flavones	-	1	9	9	9	234380	247000	284250	156730	159720	155840	--	--
Hmln002199	505.1	300.03	506.107	C23H22O13	[M-H]-	Quercetin-3-O-(6''-O-acetyl)galactoside*	Flavonoids	Flavonols	-	1	9	9	9	969640	1365900	817310	322820	405000	514770	--	--
pmp000013	507.15	345.09	506.142	C24H26O12	[M+H]+	Eupatilin-7-O-glucoside	Flavonoids	Flavones	-	2	110430	199190	130310	162410	155180	146190	140340	146860	142950	--	--
pmp000194	519.11	271.05	518.106	C24H22O13	[M+H]+	6''-O-Malonylgenistin	Flavonoids	Isoflavones	51011-05-3	1	252750	366060	353000	610400	690800	632120	510570	487250	466820	C16192	ko00943
pmp000585	519.11	433.11	518.106	C24H22O13	[M+H]+	Apigenin-7-O-(6''-malonyl)glucoside	Flavonoids	Flavones	86546-87-4	2	14220	25926	14842	44847	36930	54868	30063	38620	38221	C10020	--
pmp000531	519.19	357.13	518.179	C26H30O11	[M+H]+	Phellamurin	Flavonoids	Flavanonols	52589-11-4	2	137110	178840	164350	46217	49074	51285	100530	84507	93275	C09808	--
pmp000530	519.19	357.13	518.179	C26H30O11	[M+H]+	Phellodendroside	Flavonoids	Flavanonols	40451-69-2	2	126660	122660	168910	113630	87052	83118	104530	130570	95164	--	--
pmb0554	519.11	271.06	519.113	C24H23O13+	[M]+	Pelargonidin-3-O-(6''-O-malonyl)glucoside	Flavonoids	Anthocyanidins	165070-68-8	2	564.87	9	9	4341800	3936500	4250300	2361000	2183000	2107700	C12642	ko00942
pmn001644	519.08	300	520.085	C23H20O14	[M-H]-	Quercetin-3-O-(2''-O-acetyl)glucuronide	Flavonoids	Flavonols	-	3	9	9	9	770830	861760	543040	358770	440320	346330	--	--
pma0791	521	273	520.122	C24H24O13	[M+H]+	Naringenin-7-O-(6''-malonyl)glucoside	Flavonoids	Flavanols	-	3	31154	38094	36821	72871	78492	65476	55316	52758	46796	--	--
Li512111	519.11	315.05	520.122	C24H24O13	[M-H]-	Isorhamnetin-3-O-(6''-acetylglucoside)	Flavonoids	Flavonols	-	3	4898.2	5860.5	7071.5	1689200	1886800	1773700	852630	1051300	675300	--	--
pmb3041	521.09	329.2	522.101	C23H22O14	[M-H]-	Tricin-7-O-saccharic acid	Flavonoids	Flavones	-	3	480070	488010	439570	313450	329430	313720	318270	344670	328820	--	--
pmb3053	523.12	329.2	524.132	C27H24O11	[M-H]-	Tricin-4'-O-eudesmic acid	Flavonoids	Flavones	-	3	10391	13017	12390	20765	19170	19619	14606	13144	14021	--	--
pmp000234	527.15	331.08	526.148	C27H26O11	[M+H]+	Salcolin A*	Flavonoids	Flavones	-	1	130970	232320	210800	374690	339540	352800	267320	318690	266480	--	--
pmp000235	527.15	331.08	526.148	C27H26O11	[M+H]+	Salcolin B*	Flavonoids	Flavones	-	1	168280	252270	194690	451040	426150	416110	319250	310470	321070	--	--
pmb0746	527.15	331.08	526.148	C27H26O11	[M+H]+	Tricin-4'-O-(guaiacylglycerol)ether*	Flavonoids	Flavones	-	1	159200	245330	250690	447450	434900	424410	259990	261920	257250	--	--
Lmmp003817	535.11	287.05	534.101	C24H22O14	[M+H]+	Kaempferol-3-O-(6''-malonyl)glucoside*	Flavonoids	Flavonols	-	1	47332	67464	42004	4604700	3265500	5091100	2510100	2481400	2576600	--	--
Lmdp004892	535.11	287.05	534.101	C24H22O14	[M+H]+	Kaempferol-3-O-(6''-malonyl)galactoside*	Flavonoids	Flavonols	-	1	44204	70819	46398	3519500	4052500	4202100	2151000	2164100	2147400	--	--
Lmtp002822	535.14	499.12	534.137	C25H26O13	[M+H]+	Apigenin-6-C-arabinoside-8-C-xyloside*	Flavonoids	Flavonoid carbonoside	-	3	2326300	3090800	3473600	698660	696920	725890	1551700	1577300	1323400	--	--
pmp001110	535.14	517.13	534.137	C25H26O13	[M+H]+	Apigenin-6-C-xyloside-8-C-arabinoside	Flavonoids	Flavonoid carbonoside	-	3	926720	1156800	1045400	252400	262790	220260	519670	497790	493290	--	--
Lmtp002942	535.14	499.12	534.137	C25H26O13	[M+H]+	Apigenin-6,8-di-C-arabinoside*	Flavonoids	Flavonoid carbonoside	-	3	2392100	3284600	3165500	786640	716050	761130	1484500	1444800	1325300	--	--
pmb0542	535.11	287.06	535.108	C24H23O14+	[M]+	Cyanidin-3-O-(6''-O-malonyl)glucoside	Flavonoids	Anthocyanidins	171828-62-9	1	9	9	9	169940000	172970000	169780000	105450000	106210000	108200000	C12643	ko00942
pmp000588	549.12	463.12	548.117	C25H24O14	[M+H]+	Diosmetin-7-O-(6''-malonyl)glucoside	Flavonoids	Flavones	-	1	7466.7	10767	8074.5	143610	155590	150780	80281	78657	78560	--	--
pmb0608	549.12	301.4	548.117	C25H24O14	[M+H]+	Chrysoeriol-7-O-(6''-malonyl)glucoside	Flavonoids	Flavones	-	1	87007	98039	109520	1399500	1813900	1796200	895790	896370	953340	--	--
pmp000980	549.2	387.14	548.189	C27H32O12	[M+H]+	Maohuoside A	Flavonoids	Flavonols	128988-55-6	2	85980	137190	113950	24115	31450	43374	58094	87571	57231	--	--
pmp000589	551.1	303.05	550.096	C24H22O15	[M+H]+	Quercetin-7-O-(6''-malonyl)glucoside*	Flavonoids	Flavonols	-	1	9	9	9	3833400	3417900	3664100	2120400	1764300	2289900	--	--
Hmln002189	549.09	505.11	550.096	C24H22O15	[M-H]-	Quercetin-3-O-(6''-malonyl)galactoside*	Flavonoids	Flavonols	-	1	9	9	9	3495100	3800100	3844500	1857400	1944700	1903200	--	--
pmb3032	561.12	329.1	562.132	C26H26O14	[M-H]-	Tricin-7-O-(2''-Malonyl)rhamnoside	Flavonoids	Flavones	-	3	12373	13574	14656	20653	23792	21626	17379	17290	18113	--	--
HJAP064	565.12	317.08	564.088	C25H24O15	[M+H]+	Isorhamnetin-3-O-(6''-malonyl)glucoside*	Flavonoids	Flavonols	-	1	17454	18807	19765	5149900	5472200	5228200	2770100	2649300	2679500	--	--
Zmhp005139	565.12	317.07	564.112	C25H24O15	[M+H]+	Tamarixetin-3-O-(6''-malonyl)glucoside*	Flavonoids	Flavonols	-	1	32587	34626	33268	5457100	5652100	6386800	2635400	3043900	2944000	--	--
mws1292	565.16	409.09	564.123	C26H28O14	[M+H]+	Isoschaftoside*	Flavonoids	Flavonoid carbonoside	52012-29-0	1	2878100	3663000	3551800	1238700	1254200	1275900	2009700	1903500	2032000	--	--
mws1660	565.16	529.13	564.123	C26H28O14	[M+H]+	Schaftoside*	Flavonoids	Flavonoid carbonoside	51938-32-0	1	57055	62472	63405	9334.6	10742	16613	32501	26634	26637	C10181	--
Lmtp002474	565.16	427.1	564.148	C26H28O14	[M+H]+	Apigenin-6-C-(2''-glucosyl)arabinoside*	Flavonoids	Flavonoid carbonoside	-	1	2836700	3650500	3726200	1612800	1677900	1439500	2206000	1978200	2173100	--	--
pmp000236	565.16	367.1	564.148	C26H28O14	[M+H]+	Apigenin-6-C-glucoside-8-O-xylcoside*	Flavonoids	Flavonoid carbonoside	-	1	66345	92255	97024	28972	16020	11475	28806	45059	28785	--	--
Lmtp004126	567.1	319.04	566.091	C24H22O16	[M+H]+	Myricetin-3-O-(6''-malony)glucoside	Flavonoids	Flavonols	-	3	9	9	9	821250	765940	942230	510990	511900	457290	--	--
Zmzp006857	569.16	331.08	568.158	C29H28O12	[M+H]+	Tricin-4'-O-[β-guaiacyl-(9''-O-acetyl)glycerol]ether	Flavonoids	Flavones	-	1	104570	155760	181600	75327	62994	68171	99826	101870	97122	--	--
Zmxp005470	579.13	331.08	578.127	C26H26O15	[M+H]+	Tricin-7-O-(6''-O-malonyl)glucoside	Flavonoids	Flavones	-	1	499710	777060	764810	2016200	2367100	2106000	1341500	1350700	1266400	--	--
pme0434	577.14	407.1	578.142	C30H26O12	[M-H]-	Procyanidin B2*	Tannins	Proanthocyanidins	29106-49-8	3	9	1513.5	1006.4	6975.2	6933.1	9000.1	3988.2	4247.8	3245.9	C17639	--
pme0436	577.14	407.1	578.142	C30H26O12	[M-H]-	Procyanidin B3*	Tannins	Proanthocyanidins	23567-23-9	3	9	1513.5	1006.4	6975.2	6933.1	9000.1	3988.2	4247.8	3245.9	--	--
Lmpp003930	579.15	271.06	578.142	C30H26O12	[M+H]+	Apigenin-7-O-(6''-p-Coumaryl)glucoside	Flavonoids	Flavones	-	1	19530000	24216000	25494000	15134000	14736000	14383000	17010000	16668000	17801000	--	--
mws0836	577.14	425.1	578.142	C30H26O12	[M-H]-	Procyanidin B1*	Tannins	Proanthocyanidins	20315-25-7	3	9	9	9	5688.6	7527.1	7796.3	6445.3	5724.9	4437.1	--	--
Lmgp004474	579.17	271.06	578.164	C27H30O14	[M+H]+	Genistein-7-O-galactoside-rhamnose*	Flavonoids	Isoflavones	-	1	18384000	21537000	23271000	14923000	15377000	13964000	17139000	18237000	16966000	--	--
pme0368	579.17	271.01	578.164	C27H30O14	[M+H]+	Apigenin-7-O-rutinoside (Isorhoifolin)*	Flavonoids	Flavones	552-57-8	1	18994000	19708000	22702000	15591000	14467000	15016000	17728000	15979000	16927000	--	--
Smsp002643	579.17	271.06	579.171	C27H31O14+	[M]+	Pelargonidin-3-O-rutinoside	Flavonoids	Anthocyanidins	-	1	18968	28753	11229	2309100	2316100	2221300	1072100	1104700	1114800	C12644	ko00942
Lmlp007435	581.17	147.04	580.158	C30H28O12	[M+H]+	Isosalipurposide-6''-O-p-coumaric acid	Flavonoids	Chalcones	-	3	14625	19996	13503	8644.8	10621	25880	31228	26440	28603	--	--
mws0046	579.17	271.06	580.179	C27H32O14	[M-H]-	Naringenin-7-O-Neohesperidoside(Naringin)	Flavonoids	Flavanones	10236-47-2	3	430300	443900	416250	224530	205450	187190	291660	269250	260370	C09789	ko00941
Lmjp001877	581.15	287.05	581.15	C26H29O15+	[M]+	Cyanidin-3-O-sambubioside [Cyanidin-3-O-(2''-O-xylosyl)glucoside]	Flavonoids	Anthocyanidins	63535-17-1	3	9	9	9	265490	350480	122750	167370	153780	171560	C20490	ko00942
Lmfn004769	585.09	301.03	586.096	C27H22O15	[M-H]-	Quercetin-3-O-(4''-O-galloyl)arabinoside	Flavonoids	Flavonols	-	3	3804.9	5653.9	4892.6	15864	18154	15289	12594	13288	11976	--	--
pmp000239	595.13	505.09	594.122	C26H26O16	[M+H]+	Luteolin-6-C-(5''-glucuronyl)xyloside	Flavonoids	Flavones	-	3	30126	26863	48741	10177	3953.6	10280	20883	19525	16442	--	--
MWSslk094	593.13	125.03	594.137	C30H26O13	[M-H]-	Proanthocyanidins	Tannins	Proanthocyanidins	20347-71-1	3	13779	16841	20826	614470	636590	641910	277720	276700	293260	--	--
mws1073	595.17	457.2	594.158	C27H30O15	[M+H]+	Apigenin-6,8-di-C-glucoside	Flavonoids	Flavones	23666-13-9	3	139030	169990	206180	59599	36685	65124	96689	97373	92535	C10195	--
pmp000593	595.17	449.1	594.158	C27H30O15	[M+H]+	Luteolin-7-O-rutinoside*	Flavonoids	Flavones	3563-98-2	1	2049000	2435400	2236800	3921100	3847600	4103100	3130500	2980300	3052700	--	--
Lmsp004670	595.17	287.06	594.158	C27H30O15	[M+H]+	Kaempferol-3-O-glucoside-7-O-rhamnoside*	Flavonoids	Flavonols	-	1	7104400	8496600	8551200	13534000	15489000	15441000	11861000	11292000	11600000	--	--
Hmcp001829	595.16	303.04	594.158	C27H30O15	[M+H]+	Quercetin-3,7-Di-O-rhamnoside	Flavonoids	Flavonols	28638-13-3	3	9	9	9	184680	166320	209270	122900	104260	105030	--	--
MWSslk254	595.17	287.06	594.158	C27H30O15	[M+H]+	Kaempferol-3-O-glucorhamnoside*	Flavonoids	Flavonols	40437-72-7	1	6996700	8346400	8288500	14352000	15461000	15562000	11995000	12057000	11574000	--	--
Zmhp002431	595.17	433.11	594.158	C27H30O15	[M+H]+	saffloquinoside A	Flavonoids	Chalcones	-	2	49488	52757	20660	52236	48811	66805	36459	38672	43904	--	--
MWSHY0080	595.17	287.06	594.158	C27H30O15	[M+H]+	Luteolin-7-O-neohesperidoside (Lonicerin)*	Flavonoids	Flavones	25694-72-8	1	7223400	8817100	8351100	14596000	14834000	15257000	12254000	11611000	11303000	C12630	ko00944
MWSHY0061	595.16	287.06	594.158	C27H30O15	[M+H]+	Kaempferol-3-O-neohesperidoside	Flavonoids	Flavonols	32602-81-6	1	6752100	8209800	8020100	13903000	14073000	13871000	10671000	10762000	10717000	--	--
pme1605	593.15	285	594.158	C27H30O15	[M-H]-	Kaempferol-3-O-robinobioside(Biorobin)	Flavonoids	Flavonols	17297-56-2	3	9	173780	9	10646000	10699000	10444000	5010100	5244600	4300500	--	--
Lmsn002815	593.15	285.04	594.158	C27H30O15	[M-H]-	Kaempferol-3-O-rutinoside(Nicotiflorin)	Flavonoids	Flavonols	17650-84-9	2	1581600	1778300	1835300	3279500	3118300	3236900	2237400	2454600	2636000	C21833	ko00944,ko01110
pme1793	595.17	271.06	595.166	C27H31O15+	[M]+	Pelargonidin-3,5-O-diglucoside	Flavonoids	Anthocyanidins	17334-58-6	3	9	9	9	13088	21719	12036	11924	8447.8	12081	C08725	ko00942
pme1773	595.17	287.06	595.166	C27H31O15+	[M]+	Cyanidin-3-O-rutinoside (Keracyanin)	Flavonoids	Anthocyanidins	28338-59-2	3	236600	63308	53633	136220000	136170000	133190000	74817000	79556000	80266000	C08620	ko00942
pmb0562	605.11	271.06	605.114	C27H25O16+	[M]+	Pelargonidin-3-O-(3'',6''-O-dimalonylglucoside)	Flavonoids	Anthocyanidins	-	2	9	9	9	4655600	4455200	4677900	2040900	2550400	2503600	C16288	ko00942
pmb3002	607.17	299	608.174	C28H32O15	[M-H]-	Chrysoeriol-7-O-rutinoside	Flavonoids	Flavones	-	1	2717300	2939700	2856000	9799000	10391000	10026000	6761800	6725600	6874000	--	--
pmp001080	609.18	301.07	608.174	C28H32O15	[M+H]+	Diosmetin-7-O-Neohesperidoside (Neodiosmin)*	Flavonoids	Flavones	38665-01-9	1	496150	620610	626300	1879600	2126800	2376900	1220100	1256500	1373500	--	--
mws1661	609.18	301	608.174	C28H32O15	[M+H]+	Diosmetin-7-O-rutinoside (Diosmin)*	Flavonoids	Flavones	520-27-4	1	6953100	8738900	8343400	22456000	23656000	25950000	17138000	14904000	15456000	C10039	--
Hmgp002121	609.18	463.08	608.176	C31H28O13	[M+H]+	Hispidulin-7-O-(6''-O-p-Coumaroyl)Glucoside	Flavonoids	Flavones	-	2	3632100	4811500	5325500	13110000	15354000	14514000	9575600	9516400	9050000	--	--
Lmpp003977	609.16	301.07	609.16	C31H29O13+	[M]+	Peonidin-3-O-(6''-O-p-Coumaroyl)glucoside	Flavonoids	Anthocyanidins	-	3	4663600	5757900	5600200	16673000	14899000	15613000	11561000	10339000	10493000	--	--
Lmtp003079	609.18	301.07	609.181	C28H33O15+	[M]+	Peonidin-3-O-rutinoside	Flavonoids	Anthocyanidins	-	2	9	9	9	67596000	64641000	68675000	36592000	37492000	34949000	--	--
Lmyp004052	611.14	147.04	610.132	C30H26O14	[M+H]+	Quercetin-3-O-(6''-p-Coumaroyl)galactoside*	Flavonoids	Flavonols	-	3	17318	18117	20583	9	9	9	22417	26101	23954	--	--
Lmdp004267	611.14	147.04	610.132	C30H26O14	[M+H]+	Quercetin-3-O-(6''-p-Coumaroyl)glucoside*	Flavonoids	Flavonols	-	3	19818	19854	17210	17385	20086	18225	25454	27271	25184	--	--
Lmyp004516	611.14	147.04	610.132	C30H26O14	[M+H]+	Quercetin-3-O-(2''-p-Coumaroyl)galactoside*	Flavonoids	Flavonols	-	3	19818	19854	17210	17385	20086	18225	25454	27271	25184	--	--
Lmmp000897	611.14	287.05	610.132	C30H26O14	[M+H]+	Gallocatechin-(4α→8)-gallocatechin	Flavonoids	Flavanols	-	3	4990.5	17740	11361	34923	51607	44096	20573	31707	32691	--	--
pmb0665	611.16	465.1	610.153	C27H30O16	[M+H]+	Luteolin-8-C-glucoside-7-O-glucoside	Flavonoids	Flavonoid carbonoside	-	3	9	9	9	291550	303350	254220	174320	194230	216010	--	--
Lmbp002592	611.16	287.05	610.153	C27H30O16	[M+H]+	Kaempferol-3,7-di-O-glucoside*	Flavonoids	Flavones	-	3	9	9	9	93044	70192	73285	46984	48065	39042	--	--
Lmjp002461	611.16	303.05	610.153	C27H30O16	[M+H]+	Quercetin-3-O-neohesperidoside*	Flavonoids	Flavonols	117611-67-3	1	1008900	485450	499750	10035000	10387000	10361000	6909100	6633800	6960000	--	--
pmb0711	611.16	303.1	610.153	C27H30O16	[M+H]+	Quercetin-7-O-rutinoside*	Flavonoids	Flavonols	147714-62-3	1	898800	568990	432560	10787000	10190000	9961900	6619300	6765800	5771000	--	--
Lmbp002336	611.16	303.05	610.153	C27H30O16	[M+H]+	Quercetin-3-O-(2''-O-rhamnosyl)galactoside	Flavonoids	Flavonols	-	3	1008900	485450	499750	10035000	10387000	10361000	6909100	6633800	6960000	--	--
MWSHY0067	611.16	303.05	610.153	C27H30O16	[M+H]+	Quercetin-3-O-rutinoside (Rutin)	Flavonoids	Flavonols	153-18-4	1	892830	516440	374940	9792800	9479800	8448800	7306500	6176100	6661200	C05625	ko00944,ko01100,ko01110
Lmsp004166	611.16	303.05	610.153	C27H30O16	[M+H]+	Quercetin-3-O-glucoside-7-O-rhamnoside*	Flavonoids	Flavonols	-	1	909320	513810	456920	10397000	10825000	9994000	6585400	7203700	6852500	--	--
pmn001583	609.15	300	610.153	C27H30O16	[M-H]-	Quercetin-3-O-robinobioside	Flavonoids	Flavonols	52525-35-6	2	375630	202650	237380	6761400	6163300	5141700	3533900	4197200	4312200	--	--
Hmpp002612	611.16	287.05	610.153	C27H30O16	[M+H]+	Luteolin-7-O-gentiobioside*	Flavonoids	Flavones	-	3	9	9	9	68218	92935	73285	43478	49300	52044	--	--
Lmyn001269	609.15	285.04	610.154	C27H30O16	[M-H]-	Kaempferol-3-O-sophoroside	Flavonoids	Flavones	19895-95-5	3	5810.8	6676.5	6386.1	9	9	9	8777.6	8524.8	8443.1	C12634	ko00944
pme0001	609.18	301	610.19	C28H34O15	[M-H]-	Hesperetin-7-O-neohesperidoside(Neohesperidin)*	Flavonoids	Flavanones	13241-33-3	3	160890	135770	148200	112390	127570	144040	148710	141170	118570	C09806	ko00941
mws0036	609.18	301.09	610.19	C28H34O15	[M-H]-	Hesperetin-7-O-rutinoside (Hesperidin)*	Flavonoids	Flavanones	520-26-3	3	276540	196560	217170	194490	187120	242390	332200	190840	238860	C09755	--
pme1777	611.16	287.06	611.161	C27H31O16+	[M]+	Cyanidin-3,5-O-diglucoside (Cyanin)	Flavonoids	Anthocyanidins	2611-67-8	3	9	9	9	513890	555110	540250	243780	258470	262690	C08639	ko00942
Lmyp003349	617.11	153.02	616.106	C28H24O16	[M+H]+	Quercetin-3-O-(6''-galloyl)glucoside	Flavonoids	Flavonols	56316-75-7	3	25996	29713	29362	8662	23353	16523	24214	19254	27085	--	--
pmb0557	621.11	287.06	621.109	C27H25O17+	[M]+	Cyanidin-3-O-(3'',6''-O-dimalonyl)glucoside	Flavonoids	Anthocyanidins	171828-60-7	2	23817	7086.7	4332	11201000	10894000	10794000	5538900	5443400	6032100	C16289	ko00942
Lmcp003751	623.16	287.06	623.161	C28H31O16+	[M]+	"Cyanidin-3-O-(6""-O-acetyl-2""-O-xylosyl)glucoside"	Flavonoids	Anthocyanidins	-	3	9	9	9	4082800	4266000	3498800	2069900	2166800	2046700	--	--
HJN051	623.16	315.05	624.168	C28H32O16	[M-H]-	Tamarixetin-3-O-rutinoside	Flavonoids	Flavonols	-	2	212170	226990	197260	2379600	2647400	2101000	1396300	1114200	1459300	--	--
pmb0603	625.18	301.6	624.169	C28H32O16	[M+H]+	Chrysoeriol-7,4'-di-O-glucoside	Flavonoids	Flavones	-	3	9	4307.9	3629.1	31706	45260	43235	15051	16743	29824	--	--
Lmnp002584	625.18	463.13	624.169	C28H32O16	[M+H]+	Hispidulin-8-C-(2''-O-glucosyl)glucoside	Flavonoids	Flavonoid carbonoside	-	3	12387	17174	34874	194100	202070	175890	111470	116230	120880	--	--
Zmxp004480	625.18	301.07	624.169	C28H32O16	[M+H]+	Chrysoeriol-7-O-gentiobioside	Flavonoids	Flavones	-	2	36803	26925	52807	249630	299630	264750	202580	171260	140560	--	--
pmf0614	625.18	301.07	625.176	C28H33O16+	[M]+	Peonidin-3,5-O-diglucoside	Flavonoids	Anthocyanidins	47851-83-2	3	9	9	9	131910	121540	131800	58656	58883	59847	--	--
pmp001311	627.16	303.1	626.148	C27H30O17	[M+H]+	6-Hydroxykaempferol-7,6'-O-Diglucoside	Flavonoids	Flavonols	-	3	9	9	9	17992	33741	23232	18215	20933	17747	--	--
Lmsp003729	627.16	319.05	626.148	C27H30O17	[M+H]+	Myricetin-3-O-rutinoside*	Flavonoids	Flavonols	-	3	9	9	9	543370	439780	456760	294630	305370	287130	--	--
Zmdp003457	627.16	319.05	626.148	C27H30O17	[M+H]+	Myricetin-3-O-galactoside-3'-O-rhamnoside*	Flavonoids	Flavonols	-	3	9	9	9	538910	480750	448600	298010	350510	323460	--	--
pmp001310	627.16	303.1	626.148	C27H30O17	[M+H]+	6-Hydroxykaempferol-3,6-O-Diglucoside	Flavonoids	Flavonols	-	3	6827.6	11001	16787	39866	12959	28350	31966	34791	33503	--	--
Lmmp003487	639.12	287.05	638.112	C27H26O18	[M+H]+	Luteolin-7-O-glucuronide-(2→1)-glucuronide	Flavonoids	Flavones	-	1	9	9	9	234260	270320	263830	145780	128280	120270	--	--
Hmlp002975	639.15	493.1	638.139	C28H30O17	[M+H]+	Isorhamnetin-3-O-glucuronide-7-O-rhamnoside	Flavonoids	Flavonols	-	3	2573000	2966800	3489700	6320400	5786000	5735800	4267900	4045800	4411000	--	--
Lmgp004959	639.19	331.08	638.185	C29H34O16	[M+H]+	Tricin-7-O-neohesperidoside	Flavonoids	Flavones	53766-40-8	2	2102800	3231800	3036900	5755300	5739600	5283200	3689500	3698700	3783100	--	--
Lmpp003958	639.17	331.08	639.171	C32H31O14+	[M]+	Malvidin-3-O-(6''-O-p-coumaroyl)glucoside	Flavonoids	Anthocyanidins	-	3	2715700	3277500	3315800	5682700	6144100	4575100	4354900	4074500	4252700	--	--
Hmgp002080	641.17	317.06	640.167	C28H32O17	[M+H]+	Patuletin-7-O-rutinoside	Flavonoids	Flavonols	-	3	7115.4	6255	10298	126870	124580	85482	55764	55159	79778	--	--
Hmgp001888	641.17	317.06	640.167	C28H32O17	[M+H]+	Patuletin-3-O-rutinoside	Flavonoids	Flavonols	-	3	7115.4	6255	10298	126870	124580	85482	55764	55159	79778	--	--
Lmpp003228	641.15	317.07	641.15	C31H29O15+	[M]+	Petunidin-3-O-(6''-O-caffeoyl)glucoside	Flavonoids	Anthocyanidins	-	3	29720	43333	33174	12033	13529	14465	21861	27082	26194	--	--
pmb3014	641.15	285.3	642.158	C31H30O15	[M-H]-	Luteolin-7-O-(6''-eudesmyl)glucoside	Flavonoids	Flavones	-	3	9	9	9	209290	205900	222590	130480	113100	130150	--	--
Hmln001302	649.07	169.01	650.076	C27H22O19	[M-H]-	Furosin	Tannins	Tannin	81552-37-6	3	24568	30600	31447	5702.7	5553	25614	21105	20816	20739	--	--
pmp001289	653.13	301.1	652.128	C28H28O18	[M+H]+	Chrysoeriol-7-O-(2''-O-glucuronyl)glucuronide	Flavonoids	Flavones	-	1	9	9	9	1898100	1819100	2150700	1194100	1175500	1081900	--	--
Hmln001836	651.16	489.12	652.164	C29H32O17	[M-H]-	Kaempferol-3-O-(6''-Acetyl)glucosyl-(1→3)-Galactoside	Flavonoids	Flavonols	-	3	16839	17938	23658	20201	22098	15134	19986	19237	16793	--	--
Zmbp002578	653.18	287.06	653.171	C29H33O17+	[M]+	Cyanidin-3-O-(6''-O-acetyl)glucoside-5-O-glucoside	Flavonoids	Anthocyanidins	-	3	9	9	9	451340	446050	511600	361270	348260	204380	--	--
pmb0578	655.17	207	654.158	C32H30O15	[M+H]+	Luteolin-7-O-(6''-sinapoyl)glucoside	Flavonoids	Flavones	-	3	22845	25659	25684	43518	40484	47179	37545	33509	35442	--	--
pmb0713	655.19	331.08	654.18	C29H34O17	[M+H]+	Tricin-7-O-(2''-O-glucosyl)glucoside*	Flavonoids	Flavones	-	1	45899	56144	59794	83064	69998	68110	57711	53284	64208	--	--
Zmxp004503	655.18	331.06	654.18	C29H34O17	[M+H]+	Tricin-5,7-O-diglucoside*	Flavonoids	Flavones	-	1	65782	63833	61224	74449	45442	62215	56028	57607	55308	--	--
Lmgp003803	655.19	331.08	654.18	C29H34O17	[M+H]+	5,7,4'-Trihydroxy-6,8-dimethoxyisoflavone-7-O-galactoside-rhamnose	Flavonoids	Isoflavones	-	3	45899	56144	59794	83064	69998	68110	57711	53284	64208	--	--
Lmnp002616	655.19	493.14	654.18	C29H34O17	[M+H]+	Cirsiliol-8-C-(2''-glucosyl)glucoside	Flavonoids	Flavonoid carbonoside	-	3	51056	49734	75725	80216	61402	80589	56601	59567	55314	--	--
Lmpp003611	655.17	331.08	655.166	C32H31O15+	[M]+	Malvidin-3-O-(6''-O-caffeoyl)glucoside	Flavonoids	Anthocyanidins	-	3	46260	55950	76715	48959	52566	56473	53792	47524	58019	--	--
pmb0739	659.2	331.08	658.19	C32H34O15	[M+H]+	Tricin-4'-O-(syringyl alcohol)ether-7-O-glucoside*	Flavonoids	Flavones	-	3	19088	31999	22760	29447	19841	19274	22935	18265	17945	--	--
pmb0719	659.2	331.08	658.19	C32H34O15	[M+H]+	Tricin-4'-O-(syringyl alcohol)ether-5-O-glucoside*	Flavonoids	Flavones	-	3	11934	23150	24673	13352	17175	17556	19426	20208	22116	--	--
Hmqp003184	667.15	287.06	666.143	C29H30O18	[M+H]+	Luteolin-7-O-(6''-malonyl)glucoside-5-O-arabinoside	Flavonoids	Flavones	-	3	6560.4	13075	11859	59820	71911	55143	26842	27681	27814	--	--
pmb0725	669.18	331.08	668.174	C33H32O15	[M+H]+	Tricin-7-O-(2''-feruloyl)glucoside	Flavonoids	Flavones	-	1	4445.4	5349.1	5171.3	5531.1	5277.9	6903	4444.6	4641.3	4488.7	--	--
pmb0475	671.18	509	670.174	C29H34O18	[M+H]+	Gallic acid-4-O-(6'''-feruloyl)sophoroside	Tannins	Tannin	-	3	25212	39636	61500	52230	37593	37657	39922	34491	52144	--	--
Hmcp001919	683.18	521.12	682.174	C30H34O18	[M+H]+	Isorhamnetin-3-O-(6''-acetylglucosyl)(1→3)-glucoside	Flavonoids	Flavonols	-	3	23487	35863	24984	31898	40440	28816	22786	24245	24984	--	--
pmb1312	689.21	331.08	688.2	C33H36O16	[M+H]+	Tricin-4'-O-(guaiacylglycerol)ether-7-O-glucoside	Flavonoids	Flavones	-	3	93602	153050	152570	108930	109790	122820	130530	117410	130570	--	--
pmb0738	699.19	331.08	698.185	C34H34O16	[M+H]+	Tricin-7-O-(2''-Sinapoyl)glucoside	Flavonoids	Flavones	-	3	13669	21153	17171	54271	57199	53819	36254	37511	36503	--	--
pmb3039	703.13	329.2	704.138	C35H28O16	[M-H]-	Tricin-4'-O-oxalic acid-7-O-(p-coumaroyl)shikimic acid	Flavonoids	Flavones	-	3	3372.7	4712.4	5130.9	4778.2	4712.2	5362	4263.7	4057.7	4272.1	--	--
Lmmp002995	713.15	303.06	712.149	C30H32O20	[M+H]+	Quercetin-7-O-(2''-malonyl)glucosyl-5-O-glucoside*	Flavonoids	Flavonols	-	3	3696.9	9	6551.9	102540	103800	66432	53540	57695	55681	--	--
pmb0709	713.16	465.2	712.149	C30H32O20	[M+H]+	Quercetin-7-O-(6''-malonyl)glucosyl-5-O-glucoside*	Flavonoids	Flavonols	-	3	1359.6	9	1379.6	91847	83016	61538	42834	47946	55956	--	--
Xmbp008275	741.18	455.14	740.174	C39H32O15	[M+H]+	Castanoside B [Kaempferol-3-O-(4'',6''-di-p-coumaroyl)mannoside]	Flavonoids	Flavones	-	3	2855.9	2825.1	4110.3	9	9	9	1843.5	1798.8	1884.8	--	--
pmb0680	741.2	147.3	740.195	C36H36O17	[M+H]+	Apigenin-8-C-glucoside-7-O-(6''-p-coumaroyl)glucoside	Flavonoids	Flavonoid carbonoside	-	3	35607	66909	53089	23439	37271	27201	26463	24245	27275	--	--
pmb2991	739.21	269.2	740.216	C33H40O19	[M-H]-	Apigenin-7-O-glucoside-4'-O-rutinoside	Flavonoids	Flavones	-	3	579790	557010	544540	225110	218130	238020	365260	390710	419350	--	--
pmb2981	739.21	563.2	740.216	C33H40O19	[M-H]-	Apigenin-8-C-glucoside-7-O-rutinoside	Flavonoids	Flavones	-	3	7150.8	6962	6976.9	4192.7	4367.6	4438.9	5770.1	3790.4	5078.5	--	--
Lmzn001875	741.23	579.18	742.232	C33H42O19	[M-H]-	Naringenin-7-O-Rutinoside-4'-O-glucoside	Flavonoids	Flavones	-	3	9555.3	12122	8510.4	22313	23480	17528	15129	17649	16054	--	--
Xmyp004945	757.22	287.06	756.211	C33H40O20	[M+H]+	Kaempferol-3-O-(6''-Rhamnosyl-2''-Glucosyl)Glucoside (Camelliaside A)	Flavonoids	Flavones	135095-52-2	3	207190	235090	175580	121940	118540	135360	180160	184440	140970	--	--
pmp001105	757.22	287.06	756.211	C33H40O20	[M+H]+	Kaempferol-3-O-neohesperidoside-7-O-glucoside	Flavonoids	Flavonols	-	3	32185	34354	38405	27658	34689	24932	29191	24365	33037	--	--
Lmpp003268	757.22	287.06	756.211	C33H40O20	[M+H]+	Kaempferol-3-O-rutinoside-7-O-glucoside	Flavonoids	Flavonols	-	3	180040	202250	240050	153700	127600	114690	140770	155310	153800	--	--
Smsp001702	757.22	287.06	757.219	C33H41O20+	[M]+	Cyanidin-3-O-rutinoside-5-O-glucoside	Flavonoids	Anthocyanidins	-	3	9	9	9	25317	28189	27082	13674	14472	8279.9	C12646	ko00942
pmb0672	771.21	463.1	770.206	C37H38O18	[M+H]+	Apigenin-6-C-glucoside-7-O-(6''-feruloyl)glucoside	Flavonoids	Flavonoid carbonoside	-	3	139000	179460	187190	154200	176760	153470	159020	184650	149740	--	--
pmb0592	771.23	463.2	770.227	C34H42O20	[M+H]+	Chrysoeriol-7-O-rutinoside-5-O-glucoside	Flavonoids	Flavones	-	2	139200	177410	169110	174210	189000	183640	154470	191300	175240	--	--
Lmpp003387	771.21	301.07	771.213	C37H39O18+	[M]+	Peonidin-3-O-(6''-O-p-Coumaroylglucoside)-5-O-Glucoside	Flavonoids	Anthocyanidins	-	3	20855	33268	34270	37304	32574	31363	35084	39523	21666	--	--
Lmtp001633	771.23	609.2	771.234	C34H43O20+	[M]+	Peonidin-3-O-rutinoside-5-O-glucoside	Flavonoids	Anthocyanidins	-	3	9	9	9	134160	164010	156670	70539	74523	73835	--	--
pmb1108	773.21	593	772.206	C33H40O21	[M+H]+	Luteolin-6,8-di-C-glucoside-7-O-glucoside	Flavonoids	Flavonoid carbonoside	-	3	9	9	9	6683.1	9582	5352.4	2571.7	2251.3	2540.4	--	--
Hmgp003540	775.21	331.08	774.2	C36H38O19	[M+H]+	Tricin-4'-O-(β-guaiacylglycerol)ether-7-O-(6''-malonyl)glucoside	Flavonoids	Flavones	-	2	20933	18885	24217	35334	32632	29420	26010	22319	20555	--	--
Hmcp001589	787.23	317.06	786.221	C34H42O21	[M+H]+	Isorhamnetin-3-O-rutinoside-4'-O-glucoside*	Flavonoids	Flavonols	111393-97-6	3	9123.8	5902.9	12789	15604	27962	17820	15121	17232	18360	--	--
Lmsp003790	787.23	317.07	786.222	C34H42O21	[M+H]+	Isorhamnetin-3-O-sophoroside-7-O-rhamnoside*	Flavonoids	Flavonols	41328-75-0	3	4845.7	5981.5	9	20466	12377	22040	25058	18056	10965	--	--
pmb0666	801.22	639.1	800.216	C38H40O19	[M+H]+	Apigenin-6-C-glucoside-7-O-(6''-sinapoyl)glucoside	Flavonoids	Flavonoid carbonoside	-	3	60429	67301	81789	95936	98350	105600	67301	96420	81124	--	--
pmb0676	801.22	207.1	800.216	C38H40O19	[M+H]+	Chrysoeriol-8-C-glucoside-7-O-(6''-feruloyl)glucoside	Flavonoids	Flavonoid carbonoside	-	3	72655	72557	68426	151990	192440	156160	71336	46968	61765	--	--
Zmpp002858	801.22	639.17	801.224	C38H41O19+	[M]+	Malvidin-3-O-(6''-O-p-coumaroyl)glucoside-5-O-glucoside	Flavonoids	Anthocyanidins	-	3	63990	101790	92054	110930	98241	133820	80295	106750	121040	--	--
pmb0677	831.23	207.1	830.227	C39H42O20	[M+H]+	Chrysoeriol-6-C-glucoside-4'-O-(6''-sinapoyl)glucoside	Flavonoids	Flavonoid carbonoside	-	3	7149.7	35681	13201	36142	25116	43888	21183	31994	40333	--	--
pmb0721	831.23	177.1	830.227	C39H42O20	[M+H]+	Tricin-7-O-(2''-feruloyl)glucoside-5-O-glucoside	Flavonoids	Flavones	-	3	32919	88500	26892	9	9	9	38744	18903	39877	--	--
Lmdp004550	919.22	369.12	918.207	C41H42O24	[M+H]+	Quercetin-3-O-(6''-sinapoyl)glucoside-7-O-(6''-malonyl)glucoside	Flavonoids	Flavonols	-	3	35354	41698	45748	52128	40835	49132	38318	51931	26588	--	--
Lmdp004580	963.28	369.12	962.269	C44H50O24	[M+H]+	Kaempferol-3-O-neohesperidoside-7-O-(2''-sinapoyl)glucoside	Flavonoids	Flavonols	-	2	70101	84150	98575	94901	98104	66590	103100	49289	84283	--	--
