# Supplementary material for: Integrated Metabolomic and Transcriptomic Analysis of Anthocyanin Metabolism in Wheat Pericarp
Source: Research Square preprint supplement (doi:10.21203/rs.3.rs-5030591/v1), 2024-12-05
Supplement: Supplementary file 6 [file e6efb5ab08264d98cff4fa46.docx]

**Supplementary Figures**


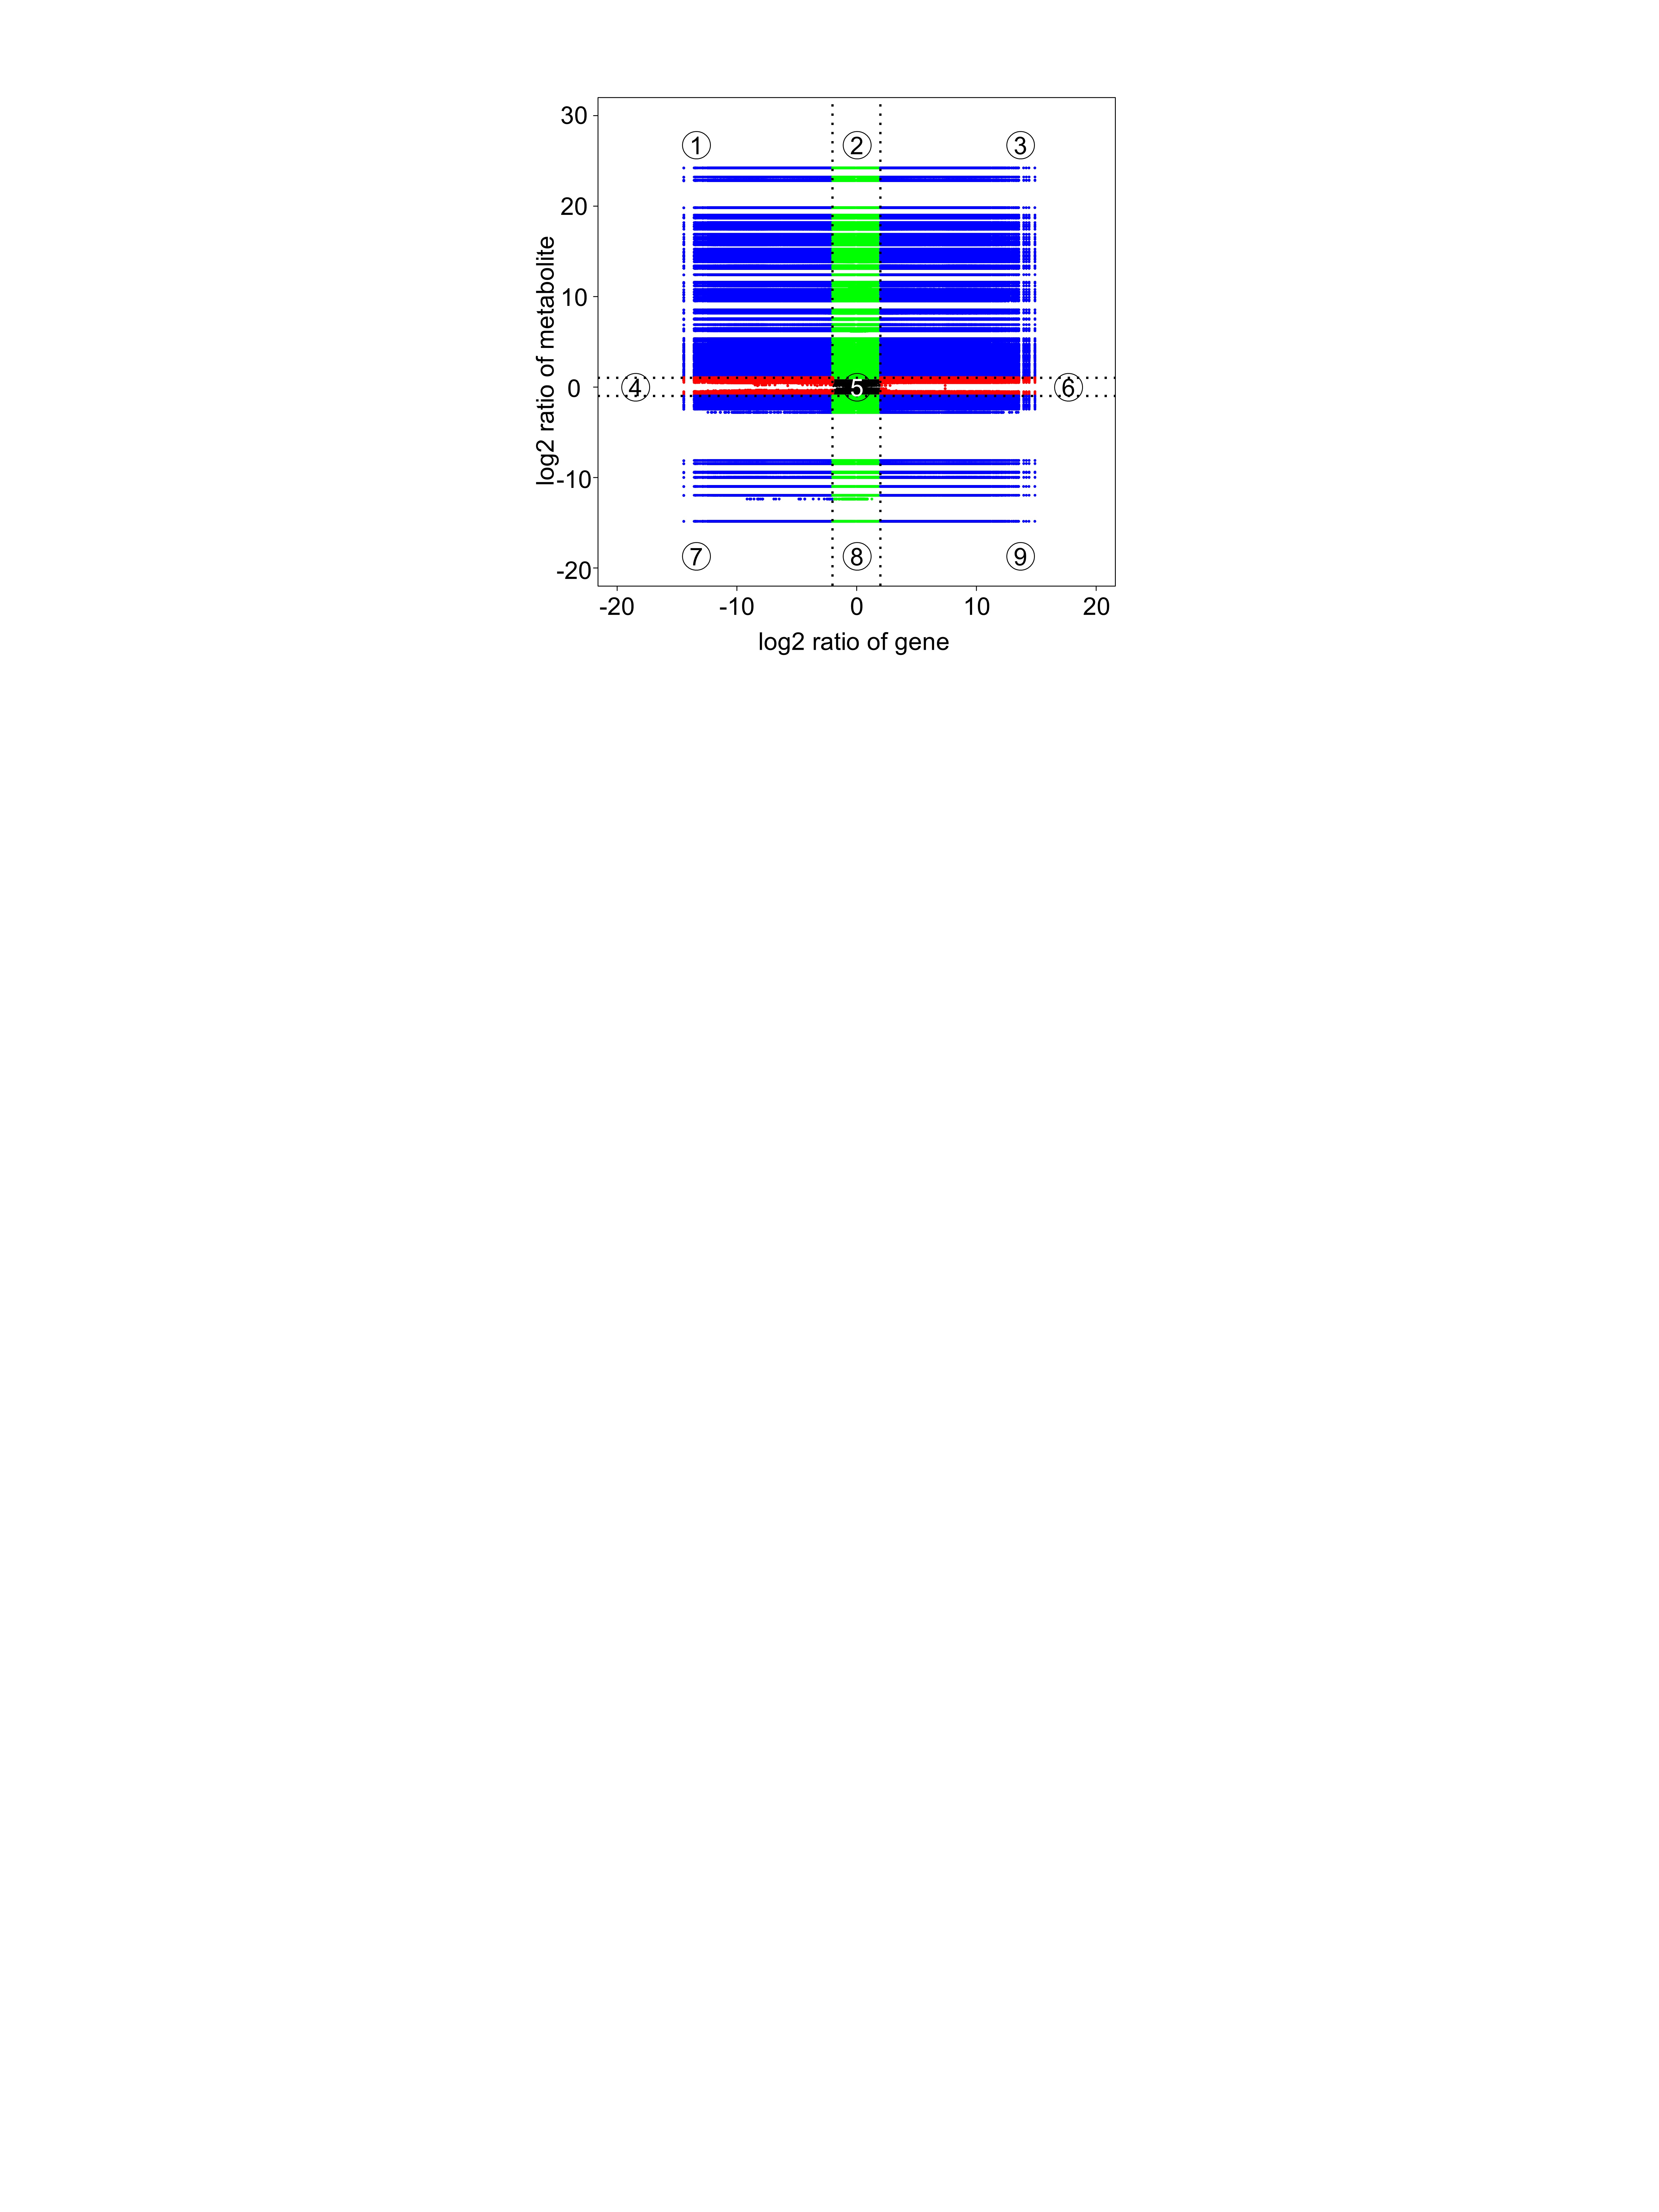


**Fig. S1** The quadrant diagram representing the association of correlated (R2 > 0.9) genes and flavonoid metabolites between Shiluan02-1 and Hengzi151. The X-axis indicates log2 ratio of genes and the Y-axis indicates the log2 ratio of metabolites; The dashed lines divide the area into ①–⑨ quadrants from left to right and from top to bottom according to different thresholds; each point represents a gene or flavonoid metabolite; black dots represent the unchanged genes or flavonoid metabolites; green dots represent differentially expressed flavonoid metabolites with unchanged genes; red dots represent genes with unchanged flavonoid metabolites; blue dots represent both differentially expressed genes and differentially accumulated flavonoid metabolites; the ①, ②and ④ quadrants indicate that the expression abundance of flavonoid metabolites is higher than that of genes; the ③ and ⑦ quadrants indicate that the expression patterns of genes are consistent with the flavonoid metabolites; the ⑤ quadrant indicates that the genes and flavonoid metabolites are not differentially expressed; the ⑥, ⑧ and ⑨ quadrants indicate that the expression abundance of flavonoid metabolites is lower than that of genes.


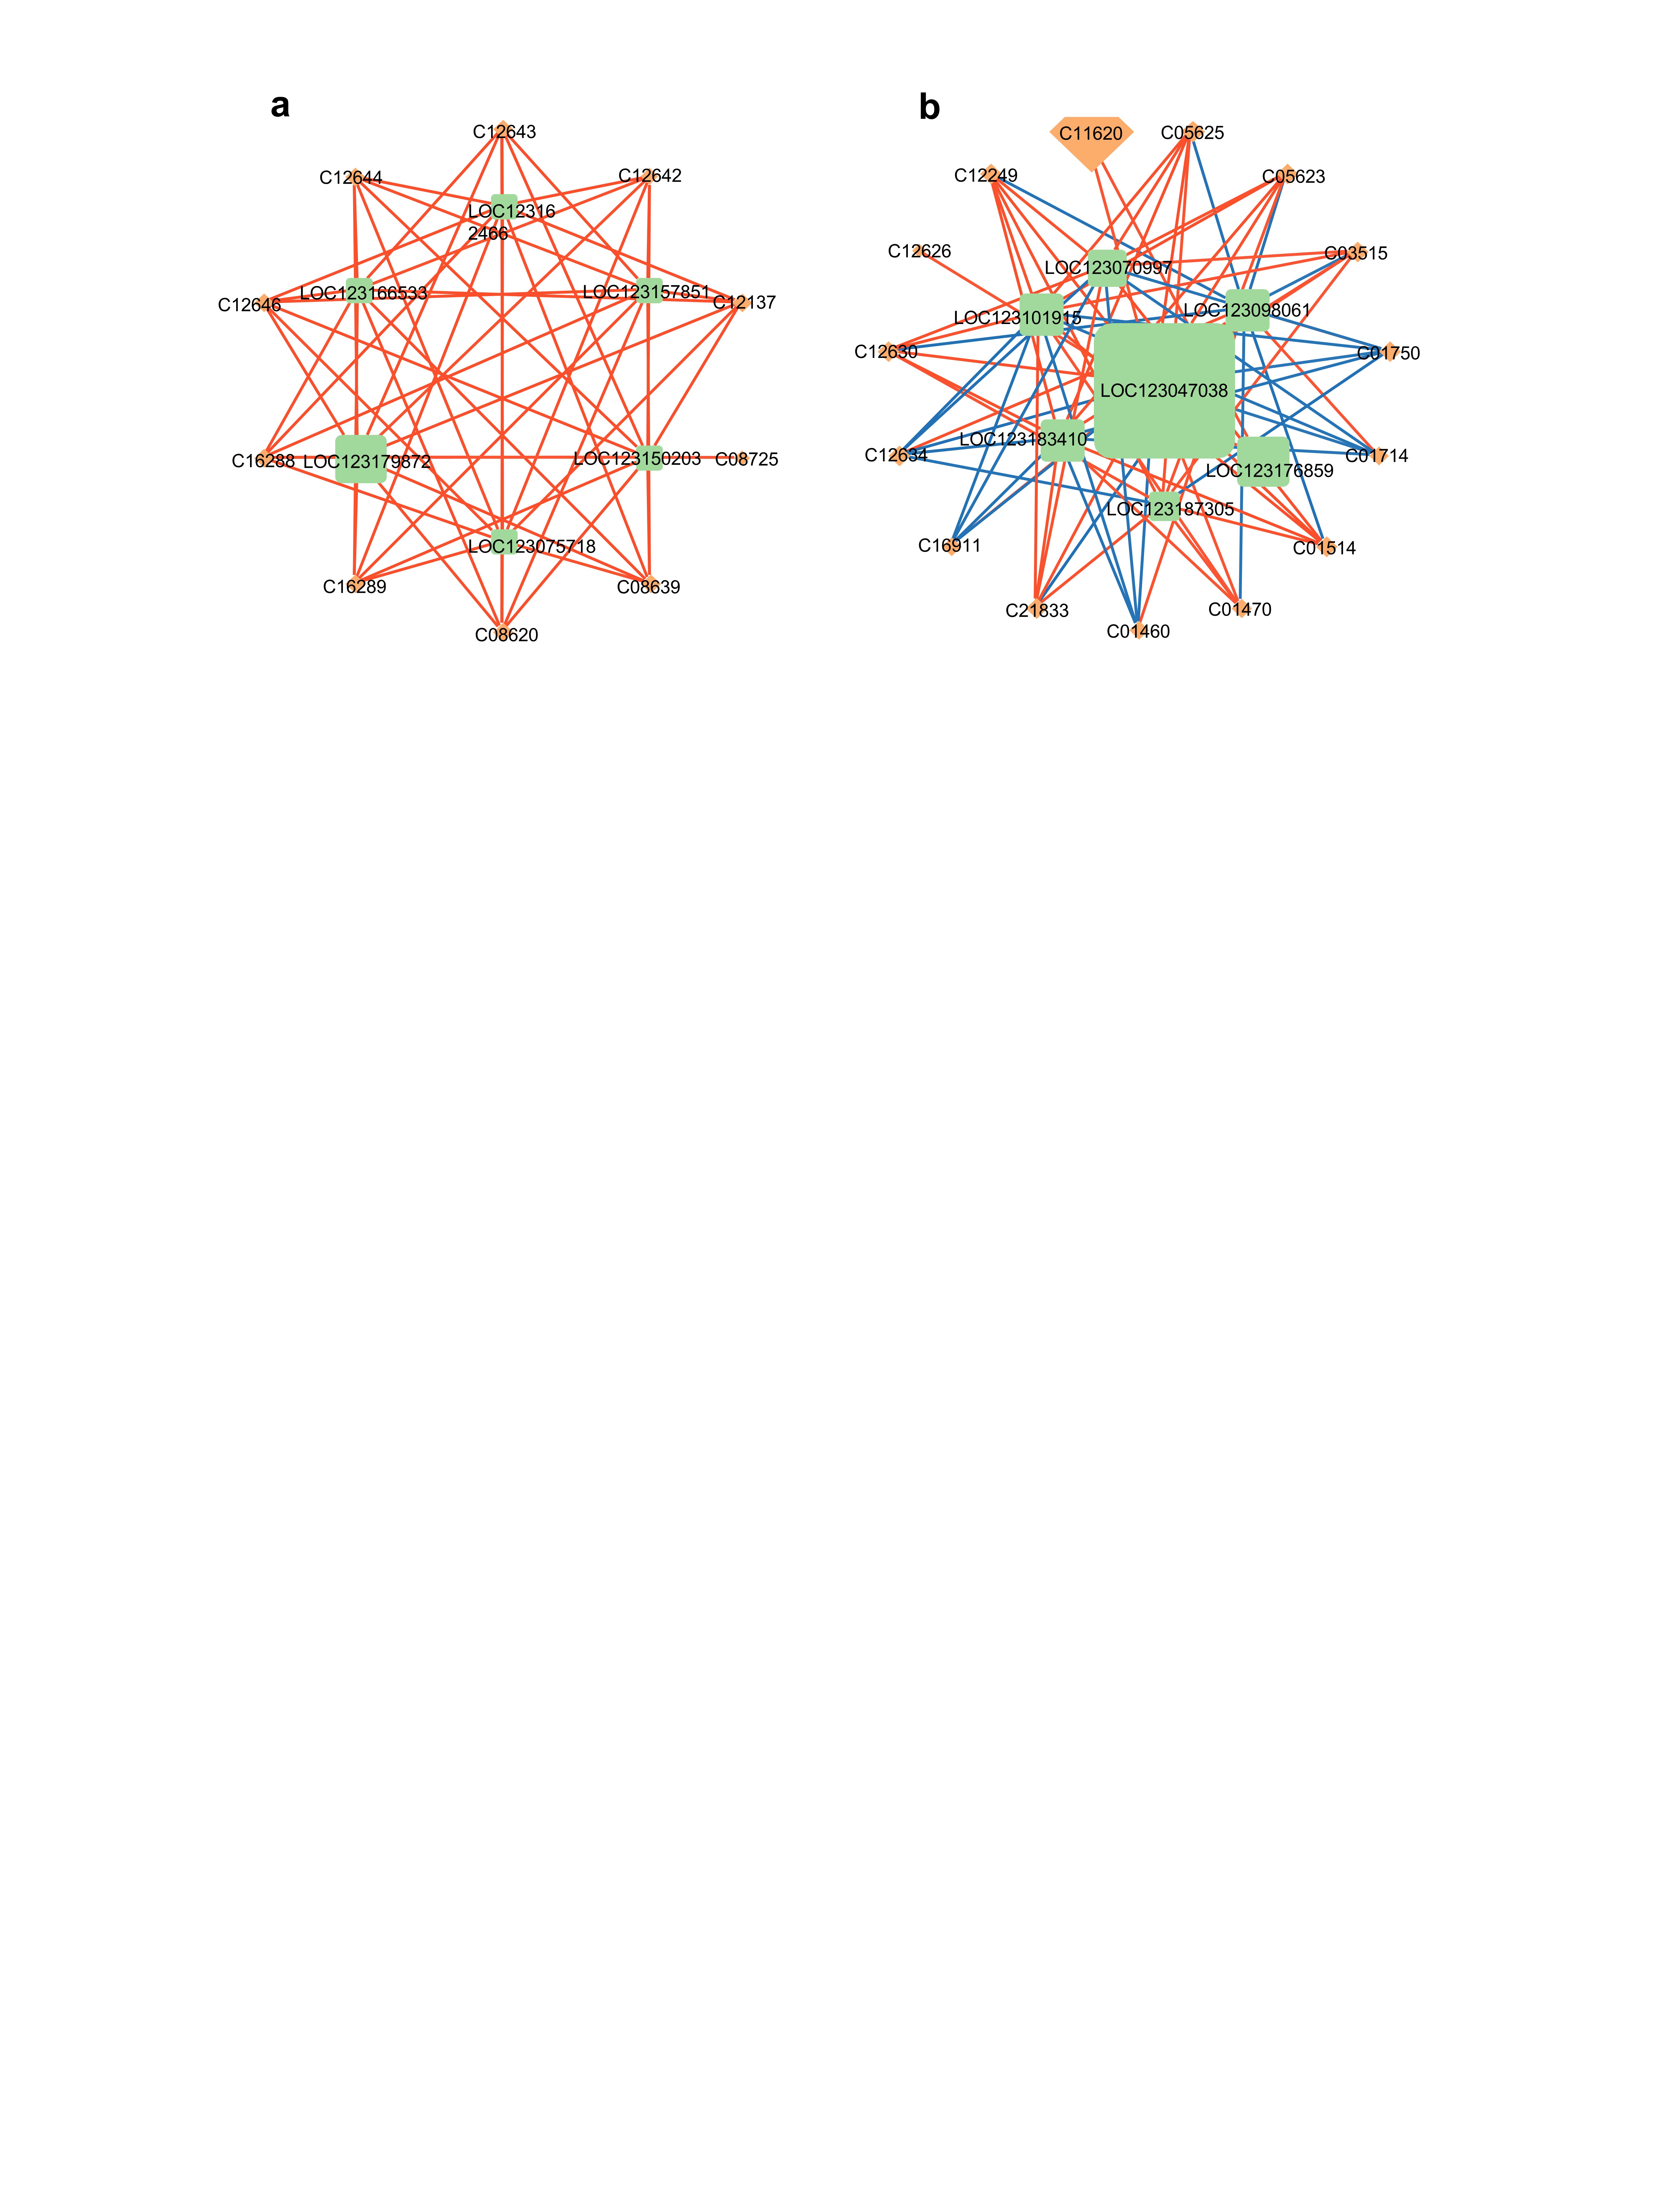


**Fig. S2** Connection network between DEGs and DAFs in Hengzi151 vs. Shiluan02-1 comparison in the taes00942 (a) and taes00944 (b) pathways. Green boxes represent genes, yellow diamonds represent metabolites. The size of green box and yellow diamond represents the number of associations between the metabolites and genes, respectively. Red lines indicate positive correlation, blue lines indicate negative correlation.


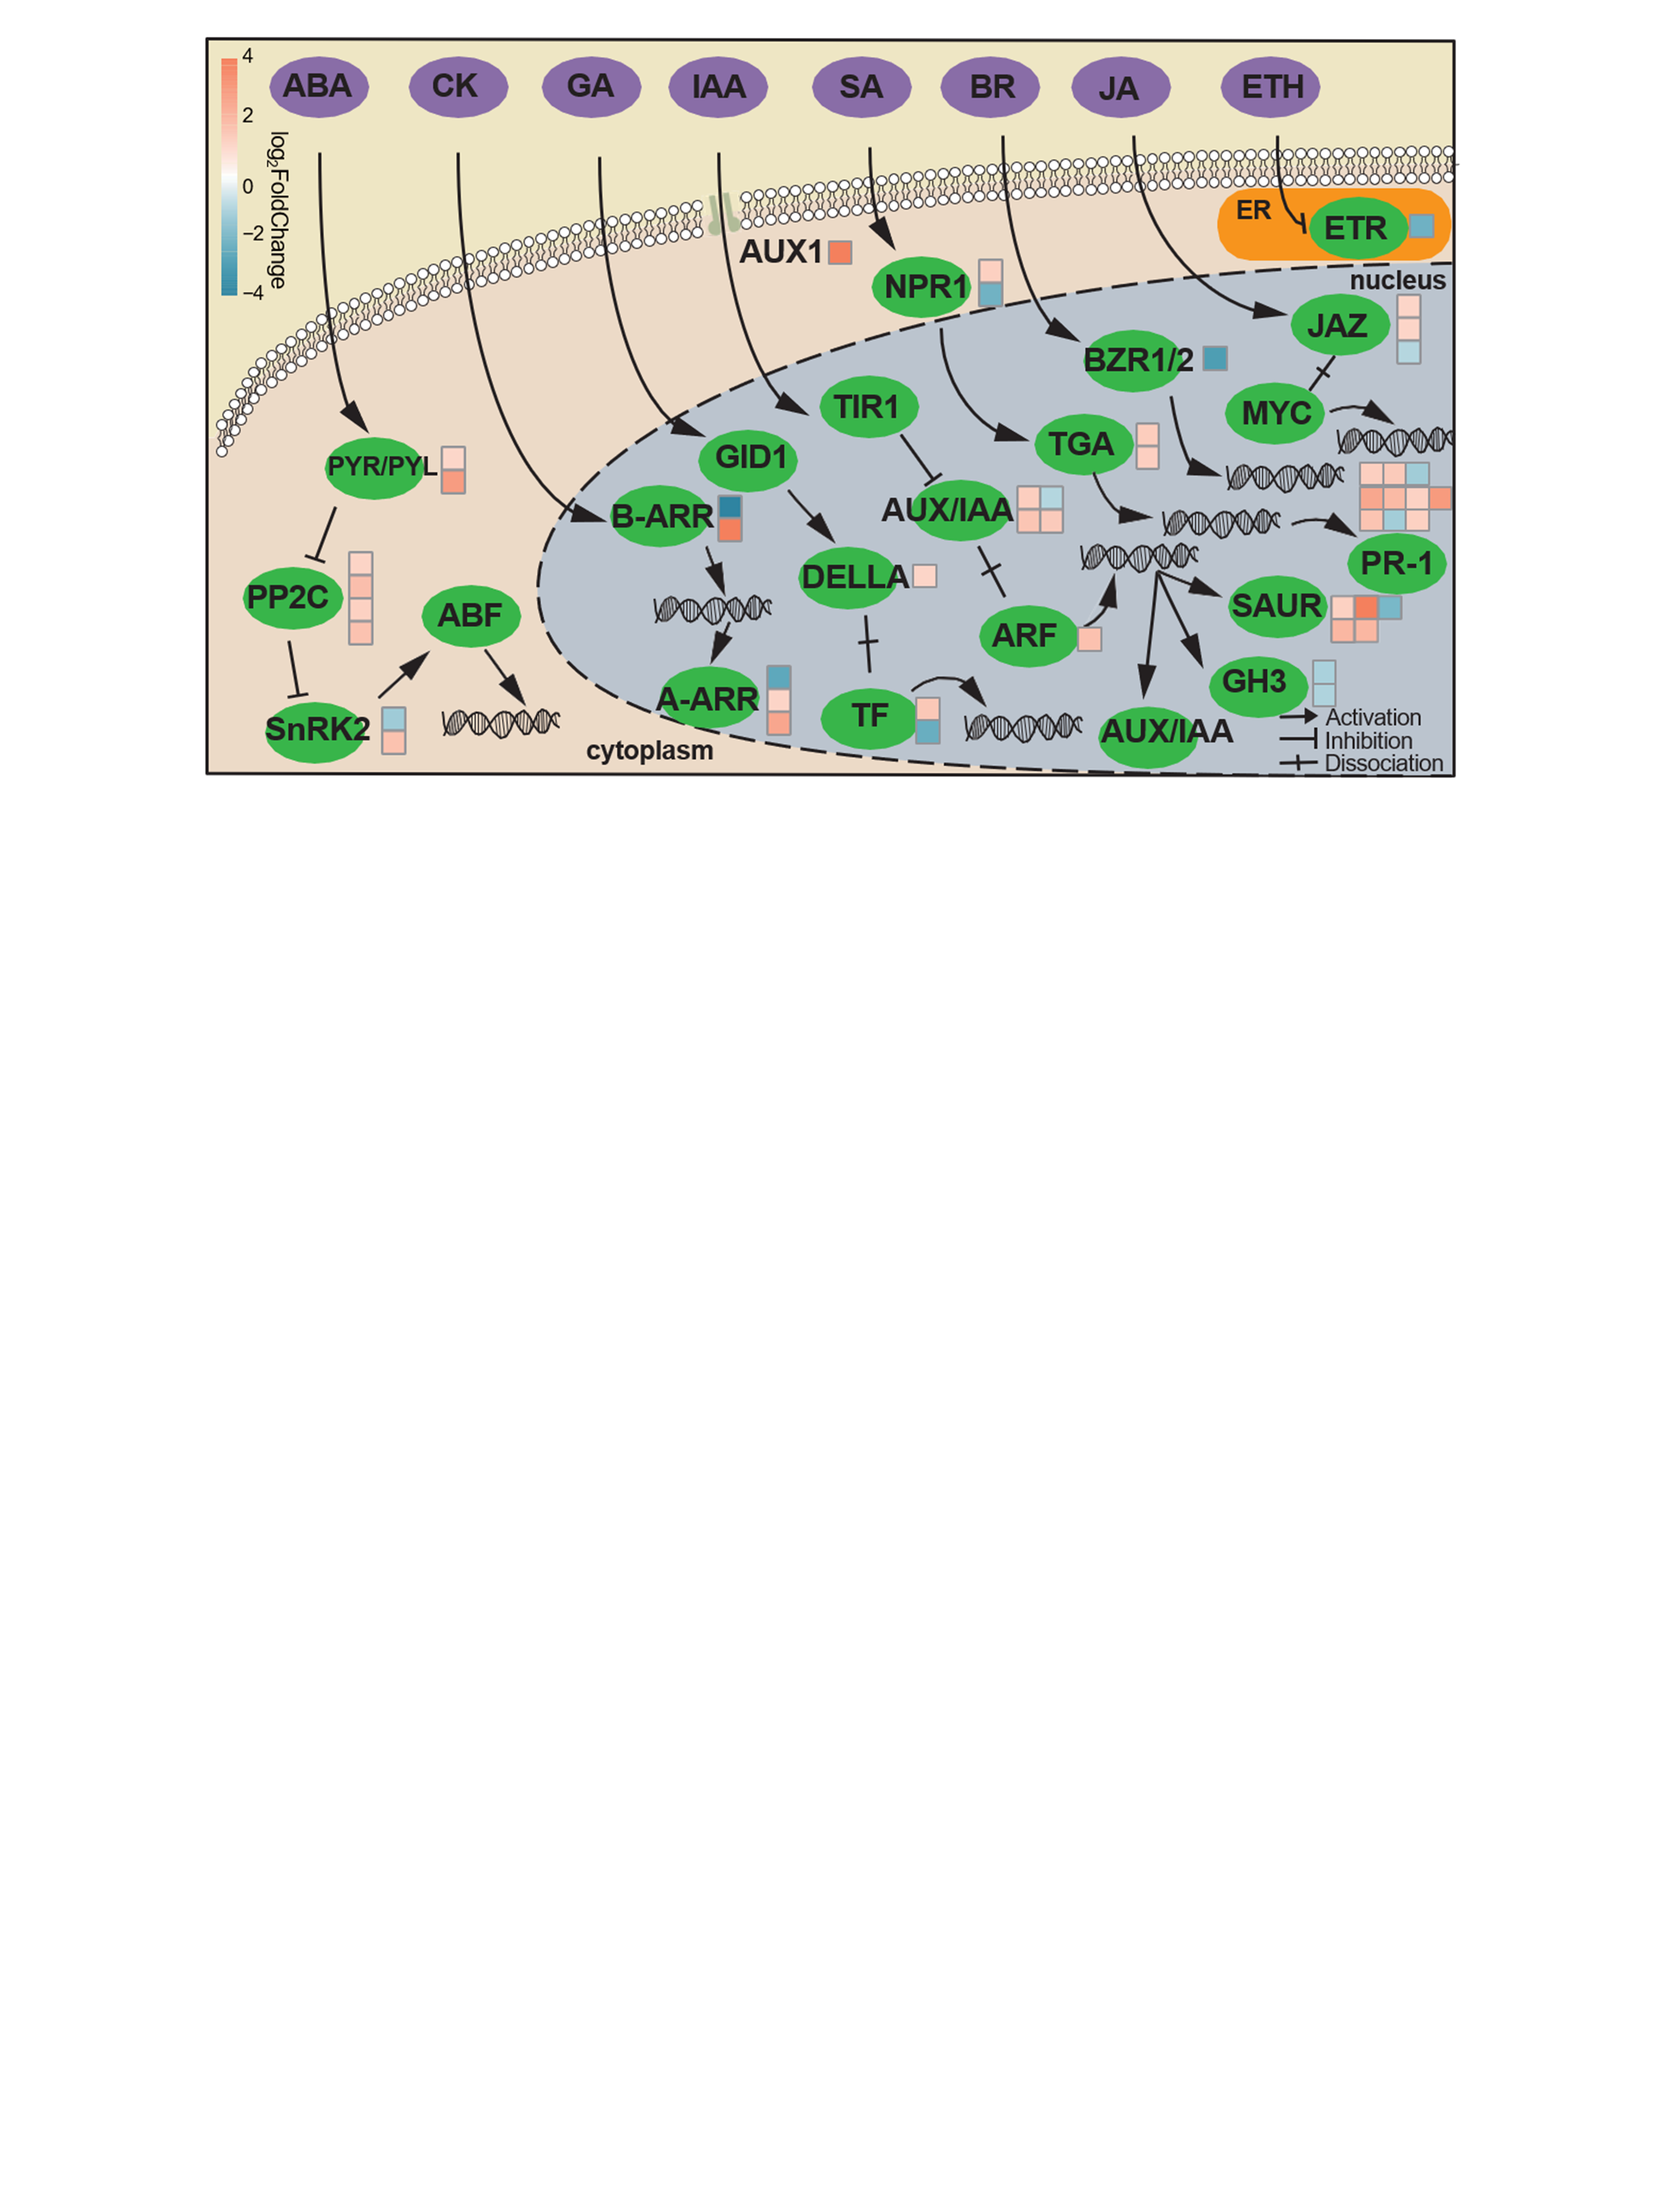


**Fig. S3** The DEGs identified in signal transduction pathways of hormones. The expression level of DEGs based on scaled FPKM values are shown in heatmap. The plot was drawn based on Taes04075 in KEGG pathway database. Notations are shown in bottom right.
